# Supplementary material for: Design of Experiments: Model Development and Optimization of the Cold Crystallization Process in Potash Production
Source: Research Square preprint supplement (doi:10.21203/rs.3.rs-7954338/v1), 2025-11-19
Supplement: Supplementary file 1 [file 26b30610be0b44fa218178cc.xlsx]

## Sheet: Sheet1
标准序	运行序	中心点	区组	小时矿量（t/h）	原矿在线检测-氯化钾含量	调和母液小时流量(m3/h)	结晶器底流液相氯化钾含量	结晶器底流体积流量(m3/h)	结晶器水雾水流量(m3/h)	结晶器淡水加入量	结晶器底流浓度
1	1	1	1	126.313	6.7409	93.48	4.76	436.544	81.1319	0.141	0.418368
5	2	1	1	126.313	6.7409	178.848	4.76	140.953	0.4318	148.723	0.49692
9	3	0	1	322.618	14.2491	136.164	3.895	288.749	40.7819	74.432	0.321821
2	4	1	1	518.923	6.7409	93.48	3.03	140.953	81.1319	148.723	0.419777
3	5	1	1	126.313	21.7572	93.48	3.03	436.544	0.4318	148.723	0.425328
7	6	1	1	126.313	21.7572	178.848	3.03	140.953	81.1319	0.141	0.290238
8	7	1	1	518.923	21.7572	178.848	4.76	436.544	81.1319	148.723	0.345428
6	8	1	1	518.923	6.7409	178.848	3.03	436.544	0.4318	0.141	0.297765
4	9	1	1	518.923	21.7572	93.48	4.76	140.953	0.4318	0.141	0.302927
				147.375	16.7707	120.957	3.41762	172.473	28.5892	83.6112	0.414382
				250.836	15.7726	133.201	3.77167	237.102	22.7952	88.9566	0.593026
				200.625	18.1657	178.848	4.10802	310.685	29.9717	74.66	0.290238
				257.553	15.7081	159.01	4.04125	368.866	30.701	83.1387	0.450068
				295.075	15.9309	150.829	3.97	404.41	30.8317	75.3816	0.284369
				264.03	17.3018	113.589	3.46	254.873	30.335	74.6445	0.49692
				518.923	16.8016	114.275	4.12	404.952	30.2643	83.0512	0.653575
				170.25	17.3361	142.384	3.75	255.414	18.3327	71.5913	0.305462
				266.625	17.139	121.85	4.6	415.647	18.4276	78.8126	0.230186
				284.5	18.7892	120.497	3.7225	401.531	27.3686	81.4548	0.442438
				126.312	17.188	119.408	4.71	140.953	27.2849	76.5861	0.425328
				191.375	16.7028	122.162	4.28	341.051	33.0204	81.42	0.220724
				210.125	15.7768	119.148	4.28	212.322	36.7244	83.1978	0.510922
				147.375	16.7707	120.957	3.41762	172.473	28.5892	83.6112	0.414382
				206.75	15.7022	124.402	3.47	303.512	29.7776	79.0724	0.23597
				240	15.3937	139.864	3.43	240.6	43.1292	75.7386	0.392023
				264.312	14.2944	141	3.95708	389.771	58.259	72.8731	0.222198
				369.625	16.0867	124.215	3.71531	424.29	0.919785	0.383173	0.381181
				368.438	15.2268	127.482	3.75656	423.454	1.67252	30.3139	0.354994
				365.312	11.9466	117.215	3.8325	405.16	1.70083	126.805	0.241267
				348.969	15.6114	133.248	3.37	412.09	32.7529	0.26581	0.268119
				356.5	15.5645	103.746	3.91857	409.367	35.6858	0.303656	0.418368
				348.438	16.6921	108.392	3.14	411.778	0.867787	0.355682	0.42548
				352.312	16.0947	124.644	3.15	413.445	81.1319	78.8783	0.36396
				345.062	17.4213	128.943	3.76625	419.403	0.431812	0.297808	0.317101
				338.25	17.8646	118.34	4.08604	410.419	0.870354	0.281326	0.48857
				349.125	16.0806	120.536	4.08354	408.932	0.890764	0.281326	0.44814
				346.812	17.4594	116.994	4.08104	410.51	0.848908	0.281326	0.4003
				332.438	16.9468	114.746	4.07854	410.229	0.829155	0.281391	0.367664
				341.5	13.4629	117.343	4.07604	404.122	0.821697	0.283372	0.288645
				335.75	15.5677	122.454	4.07354	411.451	0.863367	0.285354	0.322184
				358.125	15.954	122.762	3.85625	422.272	2.00384	148.723	0.301056
				354.375	16.3287	139.902	3.91125	405.161	1.24379	0.310005	0.390752
				348.5	15.5836	120.981	3.89625	419.607	1.46638	0.300513	0.323872
				346.625	17.4031	119.357	3.88125	426.704	1.37723	0.291022	0.368142
				344	15.9927	120.424	3.86625	417.797	1.33539	0.28153	0.330681
				372.125	18.8775	110.357	3.735	419.373	1.10082	16.4948	0.370506
				343.125	11.3427	118.342	4.14	409.262	1.22766	125.829	0.167938
				343.25	11.3282	117.595	4.14	410.41	2.08974	122.367	0.173345
				332.25	11.3137	120.497	4.14	409.401	1.47204	126.07	0.166022
				346.875	11.2992	121.909	4.14	409.658	1.62587	127.07	0.174945
				341.875	11.7648	115.839	4.14	406.714	1.70601	123.12	0.182512
				343.75	11.8172	113.465	4.14375	409.718	1.66497	126.087	0.191707
				336.75	11.7963	124.196	4.15125	413.183	1.60879	125.943	0.255314
				339.875	11.7753	122.315	4.15875	398.278	1.64109	120.566	0.27433
				342	11.7543	118.945	4.16625	413.82	1.1997	124.836	0.238179
				340.5	11.7334	114.805	4.17375	414.555	0.810547	120.678	0.254108
				342.625	11.7124	118.147	4.18125	412.715	1.33687	121.17	0.236019
