# Supplementary material for: Design of Experiments: Model Development and Optimization of the Cold Crystallization Process in Potash Production
Source: Research Square preprint supplement (doi:10.21203/rs.3.rs-7954338/v1), 2025-11-19
Supplement: Supplementary file 2 [file c7a0603efa1870040a4f8093.xlsx]

## Sheet: 副本jjq_2021.4.8
	小时矿量（T/h）	原矿在线检测（氯化钾含量）	调和母液氯化钾含量	调和母液小时流量m³/h	调和母液水比重	结晶器底流液相氯化钾含量	结晶器底流体积流量m³/h	结晶器底流液相比重	结晶器底流料浆比重	结晶器底流固相氯化钾含量	计算得出的结晶器底流浓度	结晶器底流质量流量t/h	结晶器计算得出的分解收率	结晶器水雾水流量m³/h	结晶器淡水加入量	结晶器搅拌频率	结晶器分解时间
time	shangkuangA	glskcl	tiaohe_kcl	tijiliuliang	yuankuangbizhong	diyekcl	diliuliang	diyebizhong	gudingbizhong	digu_kcl	nongdu	zhiliangliuliang	fenjieshoulv	jiejingqishuiwushuiA	jiejingqidanshuiA	jiejingqiAjiaobanpinlv
2021-01-01 01:30:00	376.812	16.4948	5.16	103.401	1.14	3.35	404.279	1.2392	1.35	27.28	0.289185	545.777	88.8765	56.2381	72.7568	38	1.94295
2021-01-01 02:30:00	372.75	14.732	5.16	99.463	1.14	3.35	404.538	1.2392	1.35	27.28	0.324966	546.126	88.1649	54.5891	68.02	38	1.99063
2021-01-01 03:30:00	367.438	15.3098	5.16	113.423	1.14	3.35	404.797	1.2392	1.35	27.28	0.341199	546.475	90.4209	53.2855	68.6147	38	1.9588
2021-01-01 04:30:00	360.562	17.4537	5.16	114.021	1.14	3.35	403.449	1.2392	1.35	27.28	0.394308	544.657	93.0969	58.8579	72.4058	38	1.94881
2021-01-01 05:30:00	371.938	13.974	5.16	113.5	1.14	3.35	408.415	1.2392	1.35	27.28	0.304535	551.36	88.1305	56.634	72.5818	38	1.92182
2021-01-01 06:30:00	365.562	16.1776	5.16	113.665	1.14	3.35	420.493	1.2392	1.35	27.28	0.344581	567.665	90.2303	52.8055	71.6052	38	1.95592
2021-01-01 07:30:00	363.75	16.6153	5.16	106.463	1.14	3.35	414.588	1.2392	1.35	27.28	0.358018	559.693	90.4457	52.0656	72.1484	38	1.98872
2021-01-01 08:30:00	359.25	16.6501	5.16	113.229	1.14	3.35	423.429	1.2392	1.35	27.28	0.345978	571.629	90.1971	52.7969	68.6906	38	1.98713
2021-01-01 09:30:00	341	16.198	5.16	109.936	1.14	3.35	399.485	1.2392	1.35	27.28	0.338113	539.305	90.0584	52.4158	71.6431	38	2.05254
2021-01-01 10:30:00	371.625	15.9674	5.16	105.739	1.14	3.35	404.89	1.2392	1.35	27.28	0.361217	546.601	90.7702	52.1127	71.8142	38	1.96689
2021-01-01 11:30:00	361.188	16.5204	5.92	113.018	1.14	3.35	404.56	1.2392	1.35	27.28	0.374924	546.156	93.6163	53.1712	71.725	38	1.97063
2021-01-01 12:30:00	367.438	15.44	5.12	107.186	1.14	4.13	404.913	1.2392	1.35	28.2667	0.306298	546.633	83.4227	53.3097	68.2176	38	1.98278
2021-01-01 13:30:00	350.125	15.557	5.98213	106.548	1.14	4.13	405.266	1.2392	1.35	28.2767	0.296268	547.109	84.1468	52.7056	74.0301	38	2.0253
2021-01-01 14:30:00	350.5	16.4102	6.02894	97.2819	1.14	4.13	405.041	1.2392	1.35	28.2867	0.315095	546.806	84.7332	52.8663	70.2966	38	2.07298
2021-01-01 15:30:00	350	16.6938	6.3	99.1307	1.14	4.13	405.284	1.2392	1.35	28.2967	0.324838	547.133	86.0739	53.6277	70.3945	38	2.06427
2021-01-01 16:30:00	351.625	16.0003	5.76	106.113	1.14	3.88104	404.977	1.2392	1.35	28.3067	0.314593	546.719	86.5352	53.6577	70.8543	38	2.02944
2021-01-01 17:30:00	369.312	15.1194	6.25	103.54	1.14	3.88354	407.803	1.2392	1.35	28.3167	0.31101	550.534	86.8305	57.5486	69.8112	38	1.97133
2021-01-01 18:30:00	359.625	14.8383	5.46	101.364	1.14	3.88604	412.98	1.2392	1.35	28.3267	0.278918	557.523	82.5469	52.957	70.0665	38	2.02572
2021-01-01 19:30:00	365.75	16.2015	6.49	99.3479	1.14	3.88854	415.734	1.2392	1.35	28.3367	0.326378	561.241	87.595	51.9074	70.331	38	2.01547
2021-01-01 20:30:00	374.125	15.6061	5.01	98.4746	1.14	3.89104	417.652	1.2392	1.35	28.34	0.305198	563.831	83.5254	54.1934	69.9846	38	1.98471
2021-01-01 21:30:00	369.562	15.1886	5.01	99.2196	1.14	3.89354	422.047	1.2392	1.35	28.34	0.284407	569.763	81.8144	51.6796	72.2263	38	1.99775
2021-01-01 22:30:00	371.562	16.4236	4.69	103.691	1.14	3.89604	427.539	1.2392	1.35	28.34	0.312441	577.178	83.7486	54.1649	74.5576	38	1.95926
2021-01-01 23:30:00	361.812	15.7755	5.8578	103.421	1.14	3.89854	409.943	1.2392	1.35	28.06	0.317157	553.423	86.2884	52.929	69.1938	38	2.01349
2021-01-02 00:30:00	356.812	15.875	6.8	97.2544	1.14	3.9	413.943	1.2392	1.35	28.06	0.313968	558.822	86.9143	53.0614	69.3876	38	2.05342
2021-01-02 01:30:00	364.375	16.082	6.8	99.5843	1.14	3.9	400.459	1.2392	1.35	28.06	0.346322	540.619	89.6543	57.1552	70.5864	38	2.00083
2021-01-02 02:30:00	367.188	15.1591	6.81	96.9224	1.14	3.06	413.424	1.2392	1.35	24.46	0.386042	558.123	94.6803	52.5124	70.7014	38	2.01665
2021-01-02 03:30:00	368.75	15.4715	4.9	97.3465	1.14	3.06	414.818	1.2392	1.35	24.46	0.378442	560.004	90.862	56.8339	74.5696	38	1.98287
2021-01-02 04:30:00	369.75	15.0593	5.33	97.2866	1.14	3.06	408.354	1.2392	1.35	24.46	0.379102	551.278	91.8058	53.09	73.2287	38	1.99644
2021-01-02 05:30:00	370.188	16.2524	6.44	103.882	1.14	3.06	420.66	1.2392	1.35	24.46	0.414829	567.891	95.7746	54.3681	76.0558	38	1.95754
2021-01-02 06:30:00	369	14.8035	6.44	102.837	1.14	3.06	429.935	1.2392	1.35	24.46	0.357579	580.412	92.9338	51.7546	70.7389	38	1.99069
2021-01-02 07:30:00	362.625	15.9889	6.44	100.128	1.14	3.06	425.031	1.2392	1.35	24.46	0.389055	573.792	94.1773	57.0346	75.4451	38	1.98898
2021-01-02 08:30:00	373.188	15.2447	5.48464	98.401	1.14	3.06	428.913	1.2392	1.35	24.46	0.365785	579.032	91.0623	57.9167	69.4926	38	1.97755
2021-01-02 09:30:00	370.188	15.6387	5.13	95.8839	1.14	3.06	417.633	1.2392	1.35	24.46	0.383307	563.804	91.3081	57.1087	72.8617	38	1.98828
2021-01-02 10:30:00	373.562	14.6766	5.13	97.3069	1.14	3.06	420.035	1.2392	1.35	24.46	0.355715	567.047	89.9889	57.6134	76.2072	38	1.95983
2021-01-02 11:30:00	364.75	15.5715	4.91	106.652	1.14	3.06	424.15	1.2392	1.35	24.46	0.369237	572.602	91.052	52.8906	74.4823	38	1.97454
2021-01-02 12:30:00	369.938	16.7468	5.82	105.996	1.14	3.61333	424.639	1.2392	1.35	28.17	0.3429	573.262	89.3815	52.8709	73.9289	38	1.96218
2021-01-02 13:30:00	365.5	16.7548	5.98	109.865	1.14	3.58833	431.45	1.2392	1.35	28.17	0.334047	582.457	89.5017	55.6132	30.6433	38	2.10015
2021-01-02 14:30:00	362.812	16.0211	5.56759	109.123	1.14	3.56333	420.56	1.2392	1.35	28.17	0.320829	567.756	88.2769	54.187	67.4079	38	1.99043
2021-01-02 15:30:00	367.938	14.9643	5.5787	104.806	1.14	3.53833	413.634	1.2392	1.35	28.17	0.305111	558.405	87.1694	54.4101	74.8785	38	1.96494
2021-01-02 16:30:00	366.75	15.0326	5.15752	114.193	1.14	3.51333	427.927	1.2392	1.35	30.78	0.263774	577.701	85.0744	52.7454	59.7304	38	1.98848
2021-01-02 17:30:00	373.938	15.1887	6.06	113.172	1.14	3.48833	414.514	1.2392	1.35	30.78	0.295268	559.594	89.5444	57.3275	60.1251	38	1.95322
2021-01-02 18:30:00	372	14.4274	6.06	115.842	1.14	3.46333	410.548	1.2392	1.35	30.78	0.280566	554.239	89.1805	52.167	59.1634	38	1.96914
2021-01-02 19:30:00	368.562	14.5206	5.86451	123.728	1.14	3.43833	418.521	1.2392	1.35	30.78	0.274225	565.003	89.111	52.3153	71.2132	38	1.91393
2021-01-02 20:30:00	368.812	15.4148	5.88535	114.693	1.14	3.44833	418.469	1.2392	1.35	30.78	0.291867	564.933	89.2705	52.5603	74.3062	38	1.93444
2021-01-02 21:30:00	364.719	14.6083	5.90618	118.722	1.14	3.47583	410.975	1.2392	1.35	30.78	0.277173	554.816	88.8404	60.231	59.5195	38	1.95509
2021-01-02 22:30:00	360.625	14.5407	6.52	118.435	1.14	3.50333	405.891	1.2392	1.35	30.78	0.281298	547.953	90.477	54.4915	63.2641	38	1.97554
2021-01-02 23:30:00	359.312	15.3513	4.81	121.553	1.14	3.53083	409.256	1.2392	1.35	27.28	0.322504	552.495	88.1232	53.8416	70.9298	38	1.94617
2021-01-03 00:30:00	357.188	17.3576	6.35	117.114	1.14	3.55833	408.264	1.2392	1.35	27.28	0.389044	551.157	94.3479	57.5886	64.6743	38	1.97695
2021-01-03 01:30:00	358.562	17.0677	5.30607	120.726	1.14	3.58583	397.874	1.2392	1.35	27.28	0.386901	537.13	92.637	52.5586	50.318	38	2.0228
2021-01-03 02:30:00	361.5	15.036	5.31434	124.926	1.14	3.61333	403.473	1.2392	1.35	25.41	0.355802	544.688	90.5984	52.7658	70.0653	38	1.93346
2021-01-03 03:30:00	352.625	15.8542	5.92	121.045	1.14	3.64083	408.328	1.2392	1.35	25.41	0.366707	551.242	91.8774	57.5518	72.0065	38	1.95395
2021-01-03 04:30:00	359.625	16.1725	5.92	118.363	1.14	3.65	404.701	1.2392	1.35	25.41	0.388668	546.346	92.7737	53.1276	68.493	38	1.96662
2021-01-03 05:30:00	350	16.3779	4.74	119.148	1.14	3.65	405.683	1.2392	1.35	25.41	0.367289	547.671	89.1673	52.1237	69.8801	38	1.99363
2021-01-03 06:30:00	357.25	16.0997	5.42	117.303	1.14	3.65	412.453	1.2392	1.35	25.41	0.366785	556.811	90.2266	56.4237	6.04354	38	2.18955
2021-01-03 07:30:00	308.75	15.2156	5.42	121.312	1.14	3.65	410.275	1.2392	1.35	25.41	0.284242	553.871	85.1541	52.5683	51.083	38	2.20047
2021-01-03 08:30:00	345.312	14.6241	6.33	116.82	1.14	3.65	409.761	1.2392	1.35	25.41	0.321821	553.177	89.5778	57.0538	70.1688	38	2.00061
2021-01-03 09:30:00	366.5	15.7311	6.07777	112.976	1.14	3.65	410.276	1.2392	1.35	25.41	0.375579	553.873	91.6818	57.3453	69.9829	38	1.94627
2021-01-03 10:30:00	357.625	17.4935	6.06289	120.71	1.14	3.65	410.021	1.2392	1.35	25.41	0.420933	553.528	94.6352	53.5945	70.8096	38	1.95564
2021-01-03 11:30:00	367.875	15.9973	6.04802	115.918	1.14	3.65	409.765	1.2392	1.35	25.41	0.387556	553.183	92.568	52.3749	71.486	38	1.94234
2021-01-03 12:30:00	371.312	15.9049	6.03314	116.645	1.14	3.92208	410.1	1.2392	1.35	23.56	0.417259	553.636	92.1582	52.6195	72.6928	38	1.9247
2021-01-03 13:30:00	368.312	15.0846	6.33	113.018	1.14	3.92708	410.435	1.2392	1.35	23.56	0.385669	554.088	90.6191	58.0916	68.1472	38	1.94386
2021-01-03 14:30:00	367.25	15.1824	6.33	118.959	1.14	3.93208	410.079	1.2392	1.35	23.56	0.391799	553.606	91.651	56.9557	70.8602	38	1.92141
2021-01-03 15:30:00	366.188	15.4811	5.29211	122.524	1.14	3.93708	409.722	1.2392	1.35	23.56	0.389765	553.125	89.5975	52.713	68.2193	38	1.9333
2021-01-03 16:30:00	366.594	15.3067	5.24474	115.88	1.14	3.94208	410.54	1.2392	1.35	25.69	0.341762	554.229	86.7182	53.376	66.1734	38	1.96005
2021-01-03 17:30:00	367	14.3459	6.22	122.462	1.14	3.94708	425.43	1.2392	1.35	25.69	0.309616	574.331	86.7673	52.1322	68.412	38	1.93221
2021-01-03 18:30:00	371.625	16.2799	5.21748	123.598	1.14	3.95208	415.209	1.2392	1.35	25.69	0.375049	560.532	89.2681	52.5851	72.3477	38	1.90097
2021-01-03 19:30:00	264.312	14.2944	5.25673	141	1.14	3.95708	389.771	1.2392	1.35	25.69	0.222198	526.19	79.4993	58.259	72.8731	38	2.17875
2021-01-03 20:30:00	389.625	16.5397	6.25	122.888	1.14	3.96	403.76	1.2392	1.35	25.69	0.43576	545.076	94.6878	52.555	74.0554	38	1.84632
2021-01-03 21:30:00	360.875	15.0456	6.25	116.26	1.14	3.96	420.418	1.2392	1.35	25.69	0.32517	567.565	87.3219	56.0558	68.2756	38	1.96164
2021-01-03 22:30:00	360.75	15.7552	5.25	116.818	1.14	3.96	428.742	1.2392	1.35	25.69	0.325251	578.801	85.0906	51.8402	75.1187	38	1.95173
2021-01-03 23:30:00	358.875	16.3589	5.74889	113.031	1.14	3.66031	424.625	1.2392	1.35	28	0.323476	573.243	88.4387	52.7724	67.7674	38	1.99219
2021-01-04 00:30:00	358.125	16.388	5.85145	121.447	1.14	3.67406	429.059	1.2392	1.35	28	0.322985	579.229	89.2546	56.8467	68.0548	38	1.94986
2021-01-04 01:30:00	352.125	15.4845	5.88797	122.648	1.14	3.68781	425.36	1.2392	1.35	28	0.297834	574.236	87.8273	54.7417	71.2888	38	1.96091
2021-01-04 02:30:00	368.438	15.6325	5.96424	121.609	1.14	3.70156	427.974	1.2392	1.35	28	0.316823	577.766	88.9884	54.431	66.9335	38	1.92826
2021-01-04 03:30:00	369.625	16.0867	6.72	124.215	1.14	3.71531	424.29	1.2392	1.35	25.56	0.381181	572.792	93.856	0.919785	0.383173	38	2.36432
2021-01-04 06:30:00	368.438	15.2268	6.62	127.482	1.14	3.75656	423.454	1.2392	1.35	25.56	0.354994	571.662	92.459	1.67252	30.3139	38	2.2204
2021-01-04 07:30:00	365.312	15.4741	4.65	122.77	1.14	3.76	411.424	1.2392	1.35	25.56	0.348134	555.422	87.4304	54.816	58.5704	38	1.95874
2021-01-04 08:30:00	361.312	15.3721	6.63	131.662	1.14	3.76	419.948	1.2392	1.35	25.56	0.357438	566.93	93.2555	54.2349	58.1479	38	1.94263
2021-01-04 09:30:00	353.688	15.1336	5.66	116.473	1.14	3.76	408.304	1.2392	1.35	25.56	0.335503	551.21	88.3108	52.9718	50.5872	38	2.05379
2021-01-04 10:30:00	347.125	15.3213	5.66	50.5922	1.14	3.76	420.901	1.2392	1.35	25.56	0.283226	568.217	77.3439	56.5964	67.54	38	2.29099
2021-01-04 11:30:00	246.438	15.1555	6.6	-0.647254	1.14	3.76	311.075	1.2392	1.35	25.56	0.234955	419.951	67.5254	55.2946	74.7148	38	3.22534
2021-01-04 12:30:00	364.188	15.3755	6.06	120.179	1.14	3.49	334.089	1.2392	1.35	26.04	0.477434	451.021	100.137	55.5119	65.8798	38	1.94639
2021-01-04 13:30:00	335.312	16.0876	6.06	129.123	1.14	3.49	410.425	1.2392	1.35	26.04	0.348372	554.074	93.1775	56.4861	67.0958	38	1.99934
2021-01-04 14:30:00	334.938	15.2529	5.61	140.919	1.14	3.49	409.349	1.2392	1.35	26.04	0.327514	552.622	92.2534	52.5902	63.8678	38	1.97991
2021-01-04 15:30:00	339.062	17.2148	7.4	131.012	1.14	4.04	409.645	1.2392	1.35	31.23	0.313096	553.02	92.6423	55.7239	71.6787	38	1.96777
2021-01-04 16:30:00	334.312	14.4364	7.4	94.2358	1.14	4.04	408.295	1.2392	1.35	31.23	0.226488	551.198	80.782	56.1911	59.8231	38	2.17262
2021-01-04 17:30:00	337.062	15.8739	7.11	111.573	1.14	4.04	410.914	1.2392	1.35	31.23	0.266106	554.734	86.162	56.4675	70.2561	38	2.05048
2021-01-04 18:30:00	345.375	15.7099	6.28	127.36	1.14	4.04	409.952	1.2392	1.35	31.23	0.272577	553.436	86.8289	54.5339	65.2041	38	1.98556
2021-01-04 19:30:00	350.5	16.6858	6.03271	119.458	1.14	4.04	410.39	1.2392	1.35	31.23	0.294188	554.027	87.0349	57.0795	63.5099	38	1.99547
2021-01-04 20:30:00	340.438	16.6231	6.05305	127.623	1.14	4.04	409.834	1.2392	1.35	31.23	0.286139	553.276	87.3659	56.0252	64.2822	38	1.99888
2021-01-04 21:30:00	330.812	15.6698	6.07339	120.478	1.14	4.04	409.811	1.2392	1.35	31.23	0.251471	553.245	83.8169	55.2089	70.1217	38	2.04181
2021-01-04 22:30:00	367.812	15.5475	6.21	117.072	1.14	3.33	407.572	1.2392	1.35	25.42	0.387935	550.223	94.8825	53.019	66.9966	38	1.95044
2021-01-04 23:30:00	394.938	13.8197	5.89	120.75	1.14	3.33	410.688	1.2392	1.35	25.42	0.361096	554.429	93.2431	51.5286	121.118	38	1.71827
2021-01-05 00:30:00	359.938	14.4975	6.62	124.125	1.14	3.33	409.44	1.2392	1.35	25.42	0.353338	552.744	95.1415	61.7557	130.52	38	1.74681
2021-01-05 01:30:00	352.375	14.6114	7.23	112.799	1.14	3.33	410.636	1.2392	1.35	25.42	0.345621	554.358	94.5951	55.7363	127.269	38	1.82506
2021-01-05 02:30:00	356.875	17.4848	6.61607	110.59	1.14	4.04	409.624	1.2392	1.35	23.65	0.446314	552.992	93.5435	61.2988	119.983	38	1.82435
2021-01-05 03:30:00	354.469	15.8055	6.59639	108.904	1.14	4.04	415.119	1.2392	1.35	23.65	0.378305	560.411	89.4939	61.2269	120.129	38	1.83612
2021-01-05 04:30:00	352.062	15.4006	5.74	119.38	1.14	4.04	407.829	1.2392	1.35	23.65	0.368526	550.569	88.5021	60.5888	121.671	38	1.80752
2021-01-05 05:30:00	355.812	15.9368	6.02	111.639	1.14	4.04	408.499	1.2392	1.35	23.65	0.389177	551.473	89.5119	61.6389	120.331	38	1.8221
2021-01-05 06:30:00	352.625	16.101	5.69	107.962	1.14	4.04	416.509	1.2392	1.35	23.65	0.372403	562.287	87.224	55.7313	120.866	38	1.85772
2021-01-05 07:30:00	361.938	15.3278	6.6	116.32	1.14	4.04	417.957	1.2392	1.35	23.65	0.374463	564.242	90.0726	61.4999	116.806	38	1.80099
2021-01-05 08:30:00	360.75	17.5775	6.6	107.303	1.14	4.04	412.697	1.2392	1.35	23.65	0.44827	557.141	93.1477	61.1788	120.466	38	1.82301
2021-01-05 09:30:00	359.562	16.704	5.90729	114.024	1.14	4.04	422.448	1.2392	1.35	23.65	0.399687	570.305	89.7561	56.2922	121.622	38	1.81551
2021-01-05 10:30:00	350.75	16.5658	6.00822	109.372	1.14	4.03938	407.937	1.2392	1.35	23.65	0.401397	550.715	89.9751	61.6136	121.868	38	1.83907
2021-01-05 11:30:00	363.562	16.2447	6.23	117.463	1.14	4.03569	408.726	1.2392	1.35	23.65	0.417026	551.781	92.1447	62.0036	120.076	38	1.78323
2021-01-05 12:30:00	360.875	16.799	5.44	117.75	1.14	4.032	413.654	1.2392	1.35	26.48	0.362244	558.432	88.3587	62.2948	110.56	38	1.81415
2021-01-05 13:30:00	348.688	16.5805	5.49363	124.973	1.14	4.02831	411.644	1.2392	1.35	26.48	0.34668	555.72	88.2407	62.4045	119.866	38	1.79943
2021-01-05 14:30:00	349.688	16.1149	5.52991	126.11	1.14	4.02462	416.808	1.2392	1.35	26.48	0.329673	562.691	87.1694	62.3082	122.451	38	1.78674
2021-01-05 15:30:00	359.562	15.8778	5.56619	113.261	1.14	4.02092	405.409	1.2392	1.35	26.48	0.343893	547.302	87.2978	62.1343	120.592	38	1.80485
2021-01-05 16:30:00	352.25	15.7581	5.60247	112.46	1.14	3.59	413.735	1.2392	1.35	26.48	0.333506	558.543	88.8634	55.4635	120.918	38	1.84489
2021-01-05 17:30:00	359.938	15.4321	5.95592	115.92	1.14	3.59	410.415	1.2392	1.35	26.48	0.343197	554.061	90.6498	57.6036	120.309	38	1.80865
2021-01-05 18:30:00	361.938	15.9927	5.96816	116.821	1.14	3.59	406.443	1.2392	1.35	26.48	0.367313	548.698	92.2004	62.8769	120.451	38	1.78614
2021-01-05 19:30:00	355.312	15.7247	6.35	107.759	1.14	3.59	407.124	1.2392	1.35	26.48	0.349274	549.617	90.9812	60.6191	119.856	38	1.83986
2021-01-05 20:30:00	349.875	17.4384	5.15	112.874	1.14	3.59	394.367	1.2392	1.35	26.48	0.398197	532.396	92.0091	61.1239	120.383	38	1.83588
2021-01-05 21:30:00	349.375	15.9535	5.15	106.708	1.14	3.59	418.129	1.2392	1.35	26.48	0.323028	564.474	86.6271	60.3368	60.1502	38	2.04864
2021-01-05 22:30:00	350.562	14.9433	3.72	107.656	1.14	3.59	417.786	1.2392	1.35	26.48	0.284295	564.011	81.0519	51.1179	70.1611	38	2.0381
2021-01-05 23:30:00	348.375	16.6944	3.47	110.492	1.14	3.94	420.378	1.2392	1.35	29.41	0.277907	567.51	79.7536	56.4689	70.5758	38	2.01501
2021-01-06 00:30:00	347.562	16.7848	3.47	109.721	1.14	3.94	412.316	1.2392	1.35	29.41	0.28741	556.626	80.6514	51.3162	70.5142	38	2.03842
2021-01-06 01:30:00	348.688	15.5773	4.57	108.216	1.14	3.94	403.54	1.2392	1.35	29.41	0.277391	544.78	81.824	55.87	69.168	38	2.02949
2021-01-06 02:30:00	344.062	16.3411	3.34	107.643	1.14	3.94	409.173	1.2392	1.35	29.41	0.274061	552.383	79.1891	55.2376	70.3241	38	2.04578
2021-01-06 03:30:00	351.188	15.6935	4.8	115.553	1.14	3.1	421.917	1.2392	1.35	27.45	0.315654	569.588	89.5478	55.0981	70.0941	38	1.99272
2021-01-06 04:30:00	350.875	16.1912	3.39	107.937	1.14	3.1	417.169	1.2392	1.35	27.45	0.317381	563.178	86.365	55.9246	71.3262	38	2.0157
2021-01-06 05:30:00	348.375	15.8567	6.32	112.027	1.14	3.1	409.409	1.2392	1.35	27.45	0.343122	552.702	94.2371	55.224	69.352	38	2.01742
2021-01-06 06:30:00	344.625	15.3329	5.07	107.665	1.14	3.1	410.283	1.2392	1.35	27.45	0.310621	553.882	89.3756	51.6836	80.5088	38	2.02115
2021-01-06 07:30:00	351.312	15.7783	4.1	111.793	1.14	3.1	409.747	1.2392	1.35	27.45	0.323018	553.158	88.4837	56.7917	81.2903	38	1.96452
2021-01-06 08:30:00	342.25	15.8324	4.37	112.624	1.14	3.1	409.749	1.2392	1.35	27.45	0.316635	553.161	88.7285	55.9414	69.6369	38	2.03245
2021-01-06 09:30:00	336.125	15.4386	5.31	106.709	1.14	3.1	409.751	1.2392	1.35	27.45	0.305908	553.164	89.5114	55.5297	0.458913	38	2.35866
2021-01-06 10:30:00	343.188	15.9117	5.31	108.96	1.14	3.1	410.404	1.2392	1.35	27.45	0.326346	554.046	90.8903	55.5932	69.6175	38	2.04483
2021-01-06 11:30:00	336.75	15.0019	4.19	107.962	1.14	3.1	409.801	1.2392	1.35	27.4258	0.28627	553.232	85.9782	55.3753	70.4388	38	2.06917
2021-01-06 12:30:00	340.375	14.9815	6.47	106.896	1.14	3.43	409.198	1.2392	1.35	27.3968	0.301592	552.418	89.5104	55.8744	69.8688	38	2.06094
2021-01-06 13:30:00	340.688	15.1631	5.84	107.984	1.14	3.43	410.438	1.2392	1.35	27.3677	0.300389	554.091	88.1779	52.0525	70.7339	38	2.06587
2021-01-06 14:30:00	343.125	15.291	6.71	104.551	1.14	3.43	409.529	1.2392	1.35	27.3387	0.313972	552.864	90.4478	54.7841	69.7817	38	2.0648
2021-01-06 15:30:00	337.938	15.7738	6.37	114.142	1.14	3.43	410.428	1.2392	1.35	27.3097	0.321886	554.078	91.3729	55.7942	57.5908	38	2.0841
2021-01-06 16:30:00	332.312	17.0325	5.82	109.249	1.14	4.25	410.6	1.2392	1.35	29.79	0.284602	554.31	83.0303	56.3623	59.625	38	2.1154
2021-01-06 17:30:00	337.438	14.5276	7.74	106.748	1.14	4.25	410.375	1.2392	1.35	29.79	0.246621	554.006	83.0288	54.7666	70.3344	38	2.07416
2021-01-06 18:30:00	341.5	15.2373	5.03	111.29	1.14	4.25	410.15	1.2392	1.35	29.79	0.246681	553.703	78.196	55.3597	60.4387	38	2.07438
2021-01-06 19:30:00	333.5	17.5821	4.13622	111.1	1.14	4.25	409.046	1.2392	1.35	29.79	0.286496	552.212	80.3764	45.1596	59.1472	38	2.14681
2021-01-06 20:30:00	342.562	17.2417	4.95	106.828	1.14	4.25	420.254	1.2392	1.35	29.79	0.282815	567.343	80.9281	41.8614	61.02	38	2.13634
2021-01-06 21:30:00	343.75	15.9774	4.95	119.875	1.14	4.25	414.956	1.2392	1.35	29.79	0.264751	560.191	80.4445	41.1116	70.1993	38	2.04792
2021-01-06 22:30:00	347	16.5297	6.01	121.183	1.14	4.25	412.598	1.2392	1.35	29.79	0.29515	557.007	85.3847	40.1086	70.7972	38	2.03302
2021-01-06 23:30:00	357.562	15.6847	4.14	113.648	1.14	3.65	407.808	1.2392	1.35	27.38	0.316523	550.54	85.0746	44.3623	69.4453	38	2.01653
2021-01-07 00:30:00	358.938	14.5951	4.74339	114.992	1.14	3.65	402.307	1.2392	1.35	27.38	0.300912	543.114	85.4157	42.7069	70.2091	38	2.00979
2021-01-07 01:30:00	352.75	17.2268	4.71037	117.03	1.14	3.65	400.788	1.2392	1.35	27.38	0.36842	541.064	89.8159	42.5629	70.6126	38	2.02187
2021-01-07 02:30:00	307.062	16.1319	4.43	116.038	1.14	4.1	403.692	1.2392	1.35	28.97	0.24385	544.985	77.7217	41.6957	69.699	38	2.20029
2021-01-07 03:30:00	335.312	12.4216	5.69	125.231	1.14	4.1	397.975	1.2392	1.35	28.97	0.207655	537.266	77.5986	41.5629	71.0941	38	2.05133
2021-01-07 04:30:00	388.5	15.4794	6.33	136.823	1.14	4.1	409.542	1.2392	1.35	28.97	0.344308	552.881	91.7025	44.1	69.4092	38	1.84166
2021-01-07 05:30:00	352.312	16.2169	5.83	133.598	1.14	4.1	407.175	1.2392	1.35	28.97	0.318024	549.687	88.6397	49.4613	78.1876	38	1.91659
2021-01-07 06:30:00	372.125	17.4978	5.83	129.814	1.14	4.1	418.214	1.2392	1.35	28.97	0.360316	564.589	90.5092	49.8781	69.6203	38	1.89457
2021-01-07 07:30:00	373.188	13.6621	5.15341	131.324	1.14	4.1	404.78	1.2392	1.35	28.97	0.267072	546.453	82.9248	47.4729	70.3795	38	1.89121
2021-01-07 08:30:00	356.125	15.8044	5.33068	127.895	1.14	4.1	413.447	1.2392	1.35	28.97	0.296596	558.153	85.2093	47.4898	70.0304	38	1.95625
2021-01-07 09:30:00	361.5	16.4156	5.66	131.692	1.14	4.1	400.391	1.2392	1.35	28.97	0.339792	540.528	89.6634	46.3102	70.2881	38	1.9289
2021-01-07 10:30:00	352.438	16.9428	5.66	123.984	1.14	4.10125	407.159	1.2392	1.35	28.9694	0.330448	549.665	88.12	46.6637	69.354	38	1.9872
2021-01-07 11:30:00	358.5	15.8831	4.96	124.468	1.14	4.105	415.751	1.2392	1.35	28.9676	0.293374	561.264	83.768	51.0656	71.4899	38	1.94525
2021-01-07 12:30:00	366.188	12.5615	3.14	128.8	1.14	4.10875	414.908	1.2392	1.35	28.9659	0.198195	560.126	69.907	50.204	70.7237	38	1.9115
2021-01-07 13:30:00	378.125	15.9517	4.12	126.888	1.14	4.1125	391.274	1.2392	1.35	28.9641	0.339404	528.22	86.0894	49.9111	69.1322	38	1.88805
2021-01-07 14:30:00	364.125	14.7916	5.24	130.775	1.14	4.11625	418.478	1.2392	1.35	28.9624	0.273692	564.946	83.1451	49.4401	70.4092	38	1.91419
2021-01-07 15:30:00	365.125	15.5775	4.98267	120.799	1.14	4.12	405.485	1.2392	1.35	28.9606	0.302886	547.405	84.422	49.1884	70.335	38	1.94709
2021-01-07 16:30:00	362	16.5289	5.035	114.549	1.14	4.12375	407.274	1.2392	1.35	28.57	0.325395	549.82	85.4258	48.6678	70.9833	38	1.97928
2021-01-07 17:30:00	374.062	15.5126	5.08733	115.898	1.14	4.1275	416.884	1.2392	1.35	28.57	0.301824	562.793	83.6342	48.5974	71.9855	38	1.93339
2021-01-07 18:30:00	363.188	15.7144	4.7	129.058	1.14	4.13	422.992	1.2392	1.35	28.57	0.289503	571.04	82.7564	46.4613	70.5467	38	1.93169
2021-01-07 19:30:00	366.5	14.5814	5.22	122.143	1.14	4.13	423.064	1.2392	1.35	28.57	0.26594	571.137	81.2008	49.8475	70.2239	38	1.93634
2021-01-07 20:30:00	357.938	15.2188	5.07	126.118	1.14	4.13	422.518	1.2392	1.35	28.57	0.27406	570.399	81.9877	50.8506	69.253	38	1.94879
2021-01-07 21:30:00	370.188	15.9148	3.58	120.704	1.14	4.13	420.415	1.2392	1.35	28.57	0.291255	567.561	80.1628	51.5209	67.2524	38	1.93403
2021-01-07 22:30:00	374.75	15.76	3.58	115.567	1.14	4.13	414.605	1.2392	1.35	28.57	0.297239	559.717	80.4798	51.0369	72.2223	38	1.92422
2021-01-07 23:30:00	352.812	17.3996	4.58	130.668	1.14	3.85	416.36	1.2392	1.35	25.9	0.375747	562.086	89.1076	51.1516	68.9441	38	1.94862
2021-01-08 00:30:00	353.812	15.6719	4.91	122.217	1.14	3.85	424.112	1.2392	1.35	25.9	0.318793	572.551	85.2568	51.7856	70.7036	38	1.96838
2021-01-08 01:30:00	348.125	18.0678	6.27	113.181	1.14	3.85	423.056	1.2392	1.35	25.9	0.389096	571.126	91.5057	47.6685	70.1725	38	2.03665
2021-01-08 02:30:00	365.75	11.6344	4.3	122.334	1.14	4.16	418.718	1.2392	1.35	29.58	0.174223	565.27	68.4591	52.008	69.5051	38	1.93353
2021-01-08 03:30:00	336.438	17.7949	4.98628	120.419	1.14	4.16	413.448	1.2392	1.35	29.58	0.306551	558.155	84.5389	33.6793	80.0884	38	2.06268
2021-01-08 04:30:00	339.125	16.4607	4.95837	117.803	1.14	4.16	413.822	1.2392	1.35	29.58	0.276323	558.66	81.8001	33.5536	81.0366	38	2.06083
2021-01-08 05:30:00	334.562	17.3008	4.93046	118.109	1.14	4.16	415.077	1.2392	1.35	29.58	0.289309	560.354	82.8476	35.9377	87.0169	38	2.04639
2021-01-08 06:30:00	343.375	12.7557	6.89	118.061	1.14	4.16	406.168	1.2392	1.35	29.58	0.217116	548.327	80.4002	35.9755	83.2374	38	2.0292
2021-01-08 07:30:00	337.812	17.6761	5.29	116.834	1.14	4.16	404.664	1.2392	1.35	29.58	0.317076	546.296	85.8081	35.7863	85.0141	38	2.04762
2021-01-08 08:30:00	337.562	17.5992	5.29	118.406	1.14	4.16	405.553	1.2392	1.35	29.58	0.314521	547.496	85.7397	35.2047	84.9727	38	2.04445
2021-01-08 09:30:00	318.062	17.4262	4.70034	118.873	1.14	4.16	399.302	1.2392	1.35	29.58	0.287321	539.058	82.6581	34.7839	76.1228	38	2.14672
2021-01-08 10:30:00	339.375	16.4135	4.64862	140.601	1.14	4.16	420.694	1.2392	1.35	29.58	0.273798	567.937	82.5749	35.1206	75.3797	38	1.98602
2021-01-08 11:30:00	335.375	17.0864	4.5969	120.897	1.14	4.16	413.731	1.2392	1.35	29.58	0.284575	558.537	82.0475	35.3272	64.5891	38	2.1144
2021-01-08 12:30:00	340.062	17.5528	5.04	121.828	1.14	3.6	412.562	1.2392	1.35	24.2	0.406505	556.959	91.7908	35.0309	68.2182	38	2.08141
2021-01-08 13:30:00	351.188	14.8866	7.74	122.797	1.14	3.6	418.836	1.2392	1.35	24.2	0.367104	565.428	96.0831	34.8944	68.7924	38	2.03709
2021-01-08 14:30:00	350.312	16.4388	7.74	124.147	1.14	3.6	417.404	1.2392	1.35	24.2	0.41571	563.495	98.4396	41.7706	120.386	38	1.8529
2021-01-08 15:30:00	345.688	15.4449	6.56303	128.823	1.14	4.25	418.346	1.2392	1.35	28.3	0.287329	564.767	86.0135	36.8801	62.6426	38	2.0467
2021-01-08 16:30:00	344.125	17.6073	4.13	130.364	1.14	4.24375	419.288	1.2392	1.35	28.3	0.31364	566.038	82.9192	36.1076	69.7674	38	2.02432
2021-01-08 17:30:00	351.938	16.0711	5.75	114.453	1.14	4.2375	413.914	1.2392	1.35	28.3	0.300349	558.784	83.9741	33.6492	129.135	38	1.87817
2021-01-08 18:30:00	349.438	12.6688	5.75	125.814	1.14	4.23125	412.14	1.2392	1.35	28.3	0.216362	556.39	76.956	31.3119	72.8594	38	2.02968
2021-01-08 19:30:00	351.062	16.1972	6.95774	124.304	1.14	4.225	409.715	1.2392	1.35	28.3	0.325561	553.116	89.6214	34.4208	70.2298	38	2.02837
2021-01-08 20:30:00	347.062	16.2106	7.00419	123.496	1.14	4.21875	407.291	1.2392	1.35	28.3	0.324188	549.842	89.6632	37.6042	70.1992	38	2.03439
2021-01-08 21:30:00	351.5	16.6008	7.05065	128.776	1.14	4.2125	410.759	1.2392	1.35	28.3	0.339469	554.525	91.2961	36.2051	69.7538	38	2.0054
2021-01-08 22:30:00	271.562	16.35	4.32	140.283	1.14	4.20625	416.755	1.2392	1.35	28.3	0.20393	562.619	73.1298	48.5078	70.3612	38	2.20184
2021-01-08 23:30:00	419.938	16.2596	7.41	118.975	1.14	4.2	401.63	1.2392	1.35	28.61	0.419777	542.201	95.368	51.7892	65.4611	38	1.80106
2021-01-09 00:30:00	340.625	14.5958	6.58	124.673	1.14	4.2	408.78	1.2392	1.35	28.61	0.266438	551.852	84.6122	48.2242	65.1667	38	2.03272
2021-01-09 01:30:00	362.125	16.6803	6.85	158.521	1.14	4.2	419.639	1.2392	1.35	28.61	0.354259	566.513	95.0574	47.1504	63.975	38	1.85299
2021-01-09 02:30:00	354.375	12.525	5.08	118.688	1.14	3.84	407.688	1.2392	1.35	25.69	0.250498	550.379	79.7977	52.1537	64.9182	38	1.99718
2021-01-09 03:30:00	360.812	16.4675	4.84	127.526	1.14	3.84	410.037	1.2392	1.35	25.69	0.37368	553.549	89.4358	48.4477	65.9662	38	1.95259
2021-01-09 04:30:00	358.562	16.8414	6.15	125.635	1.14	3.84	413.842	1.2392	1.35	25.69	0.391091	558.687	92.9537	51.8261	66.1459	38	1.95526
2021-01-09 05:30:00	357.875	15.9231	5.92365	123.393	1.14	3.84	418.304	1.2392	1.35	25.69	0.353618	564.71	90.0254	47.8649	66.034	38	1.97862
2021-01-09 06:30:00	361.125	16.9463	6.00442	121.046	1.14	3.84	416.726	1.2392	1.35	25.69	0.389509	562.58	91.9885	49.9844	67.0462	38	1.96672
2021-01-09 07:30:00	351.625	14.2218	6.08519	123.414	1.14	3.84	398.441	1.2392	1.35	25.69	0.322588	537.896	89.1403	48.4919	60.3728	38	2.01568
2021-01-09 08:30:00	360.25	16.0553	6.16596	131.099	1.14	3.84	414.216	1.2392	1.35	25.69	0.373058	559.191	92.6571	48.2466	60.6342	38	1.95898
2021-01-09 09:30:00	355.25	17.3394	6.82	122.25	1.14	3.84	419.119	1.2392	1.35	25.69	0.399384	565.811	94.245	48.3305	58.022	38	2.0164
2021-01-09 10:30:00	353.5	15.6235	6.82	116.893	1.14	3.84135	417.938	1.2392	1.35	25.69	0.345927	564.216	90.7876	57.3651	71.5341	38	1.96829
2021-01-09 11:30:00	357.812	15.3195	5.88	118.624	1.14	3.8576	400.911	1.2392	1.35	25.69	0.354493	541.23	89.9195	55.6748	71.8719	38	1.95264
2021-01-09 12:30:00	349.562	15.6838	6.45	115.588	1.14	3.87385	381.056	1.2392	1.35	29.24	0.332561	514.425	91.2419	44.13	61.8521	38	2.06327
2021-01-09 13:30:00	337.125	13.1623	6.15158	124.303	1.14	3.8901	379.797	1.2392	1.35	29.24	0.25501	512.725	86.158	45.7971	70.0256	38	2.03781
2021-01-09 14:30:00	345.625	13.9563	6.12526	125.037	1.14	3.90635	375.63	1.2392	1.35	29.24	0.289245	507.1	88.9123	46.1286	70.3234	38	2.00422
2021-01-09 15:30:00	336.312	15.6484	5.43	128.663	1.14	3.9226	382.387	1.2392	1.35	29.24	0.308681	516.223	88.5341	44.8524	68.159	38	2.0332
2021-01-09 16:30:00	339.188	15.4481	5.84	124.39	1.14	3.93885	382.245	1.2392	1.35	28.02	0.324738	516.031	89.6107	44.6782	71.3264	38	2.02981
2021-01-09 17:30:00	337.812	15.7362	6.82	120.312	1.14	3.9551	373.4	1.2392	1.35	28.02	0.350969	504.09	93.2544	45.0975	70.0381	38	2.05352
2021-01-09 18:30:00	341.625	16.2078	5.48545	129.4	1.14	3.96916	385.584	1.2392	1.35	28.02	0.341878	520.538	90.0569	45.295	70.2824	38	2.00389
2021-01-09 19:30:00	338.531	16.242	5.37636	124.179	1.14	3.95905	386.552	1.2392	1.35	28.02	0.333982	521.845	88.8167	44.7338	70.6635	38	2.03494
2021-01-09 20:30:00	335.438	18.315	5.95345	132.378	1.14	3.94895	380.78	1.2392	1.35	28.02	0.405051	514.052	94.9656	48.6295	65.1504	38	2.01922
2021-01-09 21:30:00	340.25	16.4077	5.92159	125.235	1.14	3.93884	404.397	1.2392	1.35	28.02	0.325386	545.936	89.1586	44.7705	70.4643	38	2.02555
2021-01-09 22:30:00	340.688	16.4397	5.00148	127.765	1.14	3.92874	425.7	1.2392	1.35	28.02	0.294071	574.695	84.5488	44.8837	70.2611	38	2.01467
2021-01-09 23:30:00	330.688	14.6614	6.1	124.462	1.14	3.91863	409.071	1.2392	1.35	25.26	0.301196	552.246	86.6606	45.1415	71.6813	38	2.05598
2021-01-10 00:30:00	338.375	14.4027	5.12	121.781	1.14	3.90853	420.042	1.2392	1.35	25.26	0.278172	567.057	81.7582	44.9308	74.7822	38	2.03008
2021-01-10 01:30:00	334.75	15.2915	6.1	130.035	1.14	3.89842	413.307	1.2392	1.35	25.26	0.322839	557.965	88.8903	45.7314	70.717	38	2.02154
2021-01-10 02:30:00	332.25	13.4238	5.48	125.234	1.14	3.4	412.236	1.2392	1.35	27.39	0.250939	556.519	85.7628	45.9468	76.028	38	2.02983
2021-01-10 03:30:00	349.312	16.74	6.28	119.46	1.14	3.4	408.307	1.2392	1.35	27.39	0.36515	551.214	94.2787	45.4588	68.4649	38	2.0216
2021-01-10 04:30:00	331.688	15.5371	6.28	122.552	1.14	3.4	406.246	1.2392	1.35	27.39	0.316655	548.432	92.2996	45.8979	69.6648	38	2.06452
2021-01-10 05:30:00	337.062	17.1172	5.84	119.052	1.14	3.4	410.932	1.2392	1.35	27.39	0.351349	554.758	92.532	45.5482	70.0631	38	2.05949
2021-01-10 06:30:00	342.812	18.7397	5.84	121.098	1.14	3.4	417.09	1.2392	1.35	27.39	0.393541	563.072	94.477	45.5594	70.1486	38	2.03125
2021-01-10 07:30:00	348.562	16.3164	5.09076	118.937	1.14	3.4	418.525	1.2392	1.35	27.39	0.328783	565.009	89.4646	45.4582	70.6884	38	2.01865
2021-01-10 08:30:00	348.125	16.0752	5.02241	122.172	1.14	3.4	416.622	1.2392	1.35	27.39	0.324865	562.44	89.4292	45.0734	70.1359	38	2.0109
2021-01-10 09:30:00	351.25	16.7213	6.36	123.833	1.14	3.4	413.57	1.2392	1.35	27.39	0.363812	558.319	94.7249	45.6222	68.3908	38	1.99823
2021-01-10 10:30:00	348.438	18.4241	6.36	122.531	1.14	3.40125	412.5	1.2392	1.35	27.39	0.405276	556.875	96.2919	44.7823	67.7348	38	2.0175
2021-01-10 11:30:00	339.812	16.3603	6.8	120.821	1.14	3.41625	410.59	1.2392	1.35	27.39	0.346343	554.296	94.5827	43.0994	70.3086	38	2.05056
2021-01-10 12:30:00	346.938	16.6607	4.97	129.586	1.14	3.43125	411.794	1.2392	1.35	30.65	0.304458	555.922	89.7488	42.037	69.9719	38	1.99743
2021-01-10 13:30:00	340.062	17.5454	4.15	131.4	1.14	3.44625	414.776	1.2392	1.35	30.65	0.305821	559.947	87.9676	45.7287	71.3251	38	1.99665
2021-01-10 14:30:00	342	16.2742	4.8	114	1.14	3.46125	415.251	1.2392	1.35	30.65	0.27879	560.59	86.0651	44.996	69.7049	38	2.06557
2021-01-10 15:30:00	345.062	14.7063	5.67	107.867	1.14	3.47625	414.297	1.2392	1.35	30.65	0.251841	559.301	85.0748	44.8066	71.0029	38	2.07555
2021-01-10 16:30:00	342.312	12.8817	4.76	116.215	1.14	4.07	411.189	1.2392	1.35	31.67	0.181512	555.105	72.3656	45.0225	70.2016	38	2.0538
2021-01-10 17:30:00	341.188	15.8609	5.9	116.549	1.14	4.07	404.619	1.2392	1.35	31.67	0.263481	546.236	84.228	44.7882	70.5345	38	2.05606
2021-01-10 18:30:00	346.188	16.5061	5.28	135.795	1.14	4.07	403.408	1.2392	1.35	31.67	0.287077	544.601	86.6501	42.6212	70.2408	38	1.97406
2021-01-10 19:30:00	350.688	13.2991	5.89	129.704	1.14	4.07	412.39	1.2392	1.35	31.67	0.212738	556.727	80.4253	42.8258	69.58	38	1.98343
2021-01-10 20:30:00	353.375	15.3689	6.29	132.749	1.14	4.07	408.991	1.2392	1.35	31.67	0.271388	552.138	87.379	42.8045	71.1381	38	1.95876
2021-01-10 21:30:00	349.938	14.2087	6.29	130.037	1.14	4.07	409.773	1.2392	1.35	31.67	0.239263	553.193	84.3055	42.8335	69.1307	38	1.98607
2021-01-10 22:30:00	349.625	15.3619	5.33	130.99	1.14	4.07	408.026	1.2392	1.35	31.67	0.258166	550.835	83.8538	42.6884	70.1683	38	1.98066
2021-01-10 23:30:00	343.188	15.5316	6	133.377	1.14	3.77312	412.033	1.2392	1.35	28.8624	0.296921	556.245	89.4319	43.1366	69.6355	38	1.99304
2021-01-11 00:30:00	348.688	16.4103	6.28121	122.825	1.14	3.78062	406.458	1.2392	1.35	28.8836	0.328656	548.718	91.0311	42.9378	69.6432	38	2.01532
2021-01-11 01:30:00	349.312	15.0948	6.31224	114.513	1.14	3.78813	409.794	1.2392	1.35	28.9049	0.287953	553.222	87.3276	42.9144	70.478	38	2.04263
2021-01-11 02:30:00	347.188	14.8048	5.68138	119.801	1.14	3.79562	407.13	1.2392	1.35	28.9261	0.277273	549.626	85.7626	46.0869	70.2695	38	2.01926
2021-01-11 03:30:00	346.25	17.7205	5.6969	118.127	1.14	3.80312	410.396	1.2392	1.35	28.9474	0.344261	554.034	89.9847	49.3834	70.7286	38	2.0162
2021-01-11 04:30:00	353.312	14.7198	6.28081	123.008	1.14	3.81062	392.89	1.2392	1.35	28.9686	0.304282	530.401	89.8974	52.4567	74.2573	38	1.95369
2021-01-11 05:30:00	349.062	15.4776	5.35	123.613	1.14	3.81813	401.231	1.2392	1.35	28.9899	0.299857	541.662	87.1531	52.1558	74.0866	38	1.96648
2021-01-11 06:30:00	349.312	13.4716	5.95484	131.319	1.14	3.82562	388.887	1.2392	1.35	29.0111	0.271422	524.997	87.8481	46.3066	74.2196	38	1.95594
2021-01-11 07:30:00	346.312	15.1608	5.93548	132.746	1.14	3.83	396.549	1.2392	1.35	29.02	0.303905	535.342	89.9241	49.915	74.9622	38	1.94659
2021-01-11 08:30:00	343.938	16.3172	5.36	124.091	1.14	3.83	399.232	1.2392	1.35	29.02	0.317176	538.963	88.3955	50.0394	74.5639	38	1.98653
2021-01-11 09:30:00	341	14.5488	5.72663	120.691	1.14	3.83	400.844	1.2392	1.35	29.02	0.269709	541.14	85.3731	50.1162	74.6851	38	2.00831
2021-01-11 10:30:00	349.688	15.0901	5.69289	120.265	1.14	3.83	406.428	1.2392	1.35	29.02	0.286219	548.678	86.3657	40.9517	75.9416	38	2.00733
2021-01-11 11:30:00	356.625	15.6553	5.65916	120.537	1.14	3.83	426.802	1.2392	1.35	29.02	0.286202	576.182	85.7147	45.8999	74.0645	38	1.97359
2021-01-11 12:30:00	358.25	16.1426	5.62542	127.024	1.14	3.83	425.607	1.2392	1.35	29.02	0.303804	574.57	87.5941	45.6272	71.2714	38	1.95464
2021-01-11 13:30:00	367.562	14.7327	5.59169	141.74	1.14	3.42	411.192	1.2392	1.35	23.56	0.395373	555.11	95.4877	45.3374	70.4103	38	1.87906
2021-01-11 14:30:00	352	14.9543	6.35391	119.615	1.14	3.42	413.579	1.2392	1.35	23.56	0.375361	558.331	93.8009	43.625	70.1334	38	2.01254
2021-01-11 15:30:00	341.125	16.2934	6.28311	126.751	1.14	3.42	421.306	1.2392	1.35	23.56	0.39466	568.763	95.1493	42.8866	74.8275	38	2.00848
2021-01-11 16:30:00	351.562	15.9366	5.22	123.041	1.14	3.34	424.647	1.2392	1.35	28.3	0.308911	573.273	89.4505	45.8446	70.2976	38	1.99317
2021-01-11 17:30:00	347.125	16.5477	6.69	134.574	1.14	3.2	420.27	1.2392	1.35	28.3	0.347935	567.365	97.2577	42.1287	70.6654	38	1.97574
2021-01-11 18:30:00	350.062	16.5426	6.24	137.416	1.14	3.2	422.998	1.2392	1.35	28.3	0.34473	571.047	96.203	42.846	69.948	38	1.95604
2021-01-11 19:30:00	347.25	15.8741	6.24	136.061	1.14	3.2	417.646	1.2392	1.35	28.3	0.330411	563.822	95.6423	43.0608	77.6667	38	1.94482
2021-01-11 20:30:00	341.312	16.6608	4.95217	127.359	1.14	3.2	419.356	1.2392	1.35	28.3	0.323291	566.131	91.0853	45.7412	70.714	38	2.00975
2021-01-11 21:30:00	349.812	16.7463	4.92981	132.864	1.14	3.2	422.36	1.2392	1.35	28.3	0.334005	570.186	92.0029	44.1393	68.0969	38	1.97516
2021-01-11 22:30:00	335.125	16.1662	4.90745	137.826	1.14	3.2	417.277	1.2392	1.35	28.3	0.310206	563.323	91.2808	42.9795	79.7988	38	1.97031
2021-01-11 23:30:00	349.438	15.549	5.23	141.932	1.14	3.43	426.595	1.2392	1.35	30.06	0.280659	575.904	89.4224	42.3966	70.3219	38	1.9421
2021-01-12 00:30:00	338.5	16.3679	4.7244	141.936	1.14	3.43	422.277	1.2392	1.35	30.06	0.286517	570.073	88.6172	45.7602	70.3533	38	1.96585
2021-01-12 01:30:00	30.3125	16.0101	5.42	2.63897	1.14	3.43	99.2227	1.2392	1.35	30.06	0.0118191	133.951	9.80626	44.6143	69.7591	38	8.20471
2021-01-12 02:30:00	346.688	15.6893	4.7	114.287	1.14	3.43	349.491	1.2392	1.35	30.06	0.352849	471.813	92.0037	47.1684	75.0321	32	2.02243
2021-01-12 03:30:00	337.688	16.13	4.44	124.097	1.14	3.43	411.892	1.2392	1.35	30.06	0.281459	556.054	86.3717	44.963	74.2792	38	2.02505
2021-01-12 04:30:00	344.312	14.5749	5.14582	125.866	1.14	3.43	412.178	1.2392	1.35	30.06	0.25969	556.441	86.5574	42.7541	91.9386	38	1.94668
2021-01-12 05:30:00	350.938	12.5647	5.12493	119.539	1.14	3.43	416.601	1.2392	1.35	30.06	0.212242	562.411	81.3753	46.5683	71.1019	38	2.00335
2021-01-12 06:30:00	253.688	15.5763	5.10403	-4.68938	1.14	3.43	371.78	1.2392	1.35	30.06	0.164803	501.903	62.923	44.3666	75.6375	38	3.28982
2021-01-12 07:30:00	240	15.3937	5.08313	139.864	1.14	3.43	240.6	1.2392	1.35	30.06	0.392023	324.81	103.604	43.1292	75.7386	38	2.33795
2021-01-12 08:30:00	351.5	14.4663	5.92	129.202	1.14	3.43	401.085	1.2392	1.35	30.06	0.284318	541.465	91.0082	43.3841	74.9568	38	1.96359
2021-01-12 09:30:00	355.25	13.9953	4.04	125.312	1.14	3.43	419.56	1.2392	1.35	30.06	0.239084	566.406	81.8749	42.7694	75.3512	37.9968	1.96647
2021-01-12 10:30:00	357.625	15.1618	4.04	130.436	1.14	3.43	422.455	1.2392	1.35	30.06	0.267772	570.315	84.6626	45.6525	75.1373	38	1.93233
2021-01-12 11:30:00	362.438	15.1787	4.72	116.62	1.14	3.43	413.67	1.2392	1.35	30.06	0.283314	558.455	86.4523	44.6461	75.6505	38	1.96821
2021-01-12 12:30:00	357.188	16.91	5.45	122.317	1.14	3.81	409.828	1.2392	1.35	27.46	0.358588	553.268	90.1969	45.3739	75.5174	38	1.96235
2021-01-12 13:30:00	360.812	15.3039	6.85	127.515	1.14	3.81	413.904	1.2392	1.35	27.46	0.332101	558.77	92.2828	45.2842	75.202	38	1.93371
2021-01-12 14:30:00	214.625	14.8771	5.24	-1.39149	1.14	3.81	372.494	1.2392	1.35	27.46	0.106683	502.867	46.1372	45.2218	74.6085	38	3.64044
2021-01-12 15:30:00	65.875	16.0339	4.30618	129.886	1.14	3.81	81.9411	1.2392	1.35	27.46	0.486354	110.62	139.871	45.64	75.5776	38	3.61553
2021-01-12 16:30:00	411.25	16.5238	5.88	128.852	1.14	3.81	410.773	1.2392	1.35	27.46	0.422901	554.543	94.7674	45.3197	76.6826	38	1.78167
2021-01-12 17:30:00	349.938	16.0963	6.45	122.395	1.14	3.81	410.062	1.2392	1.35	27.46	0.337874	553.584	91.1845	47.4675	74.5003	38	1.98188
2021-01-12 18:30:00	348.125	16.6056	6.45	122.544	1.14	3.81	419.33	1.2392	1.35	27.46	0.337992	566.096	90.8877	48.6006	67.6481	38	2.00603
2021-01-12 19:30:00	342.438	16.1139	4.29	124.654	1.14	3.81	421.146	1.2392	1.35	27.46	0.29462	568.547	83.3576	53.1797	70.3572	38	1.99281
2021-01-12 20:30:00	344	15.006	4.89593	119.992	1.14	3.8125	413.554	1.2392	1.35	27.46	0.280501	558.298	83.3062	46.4583	67.0045	38	2.03918
2021-01-12 21:30:00	351.25	14.1187	4.79504	113.607	1.14	3.8175	409.888	1.2392	1.35	27.46	0.265071	553.348	81.2177	50.2711	74.9538	38	1.9997
2021-01-12 22:30:00	344.625	15.6107	5.82357	117.039	1.14	3.8225	413.224	1.2392	1.35	27.46	0.305199	557.853	86.9033	0.992326	124.069	38	2.00923
2021-01-12 23:30:00	364.938	15.6322	5.85038	120.677	1.14	3.8275	411.15	1.2392	1.35	27.46	0.334304	555.053	89.3177	1.06868	124.375	38	1.92975
2021-01-13 00:30:00	365.312	11.9466	5.87718	117.215	1.14	3.8325	405.16	1.2392	1.35	26.97	0.241267	546.966	81.5511	1.70083	126.805	38	1.93131
2021-01-13 01:30:00	359.812	15.6073	5.90399	123.096	1.14	3.8375	412.434	1.2392	1.35	26.97	0.33444	556.786	89.4301	1.34169	118.36	38	1.95499
2021-01-13 02:30:00	370.062	16.004	5.93079	120.478	1.14	3.8425	417.462	1.2392	1.35	26.97	0.350736	563.574	90.0136	49.966	70.2231	38	1.93084
2021-01-13 03:30:00	357.812	16.3208	5.78	123.997	1.14	3.8475	406.327	1.2392	1.35	21.33	0.474073	548.542	94.9838	49.4108	69.9421	38	1.95917
2021-01-13 04:30:00	359.188	14.8764	5.18	119.825	1.14	3.84938	396.48	1.2392	1.35	21.33	0.426511	535.248	91.1291	51.1596	74.7556	38	1.94915
2021-01-13 05:30:00	353.812	13.3621	5.42	118.425	1.14	3.84812	410.013	1.2392	1.35	21.33	0.344069	553.517	85.9252	50.5174	69.932	38	1.98893
2021-01-13 06:30:00	355.125	12.3163	6.12	116.636	1.14	3.84687	412.441	1.2392	1.35	21.33	0.312871	556.795	84.9553	51.212	65.6867	38	2.003
2021-01-13 07:30:00	357.281	16.0073	6.12	116.664	1.14	3.84562	422.342	1.2392	1.35	21.33	0.435395	570.162	92.5857	51.4627	70.5296	38	1.97918
2021-01-13 08:30:00	359.438	12.2567	5.04	117.407	1.14	3.84437	416.516	1.2392	1.35	21.33	0.296825	562.296	80.809	51.4688	69.5958	38	1.97249
2021-01-13 09:30:00	347.375	15.1898	4.65	112.97	1.14	3.84312	424.301	1.2392	1.35	21.33	0.366795	572.806	84.9321	50.9586	71.426	38	2.02456
2021-01-13 10:30:00	356.5	14.4563	4.65	118.512	1.14	3.84187	417.761	1.2392	1.35	21.33	0.36654	563.978	85.5577	49.8591	75.2041	38	1.96506
2021-01-13 11:30:00	357.812	14.5809	5.96	116.37	1.14	3.84062	404.765	1.2392	1.35	21.33	0.409055	546.433	91.3839	50.3629	70.1081	38	1.98347
2021-01-13 12:30:00	360.438	15.9829	4.07	117.026	1.14	3.83375	403.406	1.2392	1.35	29.5	0.301619	544.598	84.1144	54.954	70.0323	38	1.95819
2021-01-13 13:30:00	359.625	15.8305	5.37	119.183	1.14	3.82125	409.728	1.2392	1.35	29.5	0.30337	553.133	86.952	49.3312	72.4586	38	1.9631
2021-01-13 14:30:00	356	12.3693	5.37	114.368	1.14	3.80875	400.742	1.2392	1.35	29.5	0.218941	541.002	79.3512	41.6442	69.4131	38	2.02831
2021-01-13 15:30:00	356.688	15.8468	4.3	119.605	1.14	3.79625	407.408	1.2392	1.35	29.5	0.293605	550.001	84.279	39.6614	70.1355	38	2.01016
2021-01-13 16:30:00	349.562	11.8239	5.79	110.776	1.14	3.78375	409.467	1.2392	1.35	27.8	0.208863	552.78	77.6556	38.5138	69.4305	38	2.07572
2021-01-13 17:30:00	351.125	15.5691	6.55	121.18	1.14	3.77125	412.432	1.2392	1.35	27.8	0.319294	556.784	90.406	41.4885	70.1864	38	2.01647
2021-01-13 18:30:00	347.375	16.1504	4.91	118.664	1.14	3.75875	408.745	1.2392	1.35	27.8	0.316623	551.806	86.5749	40.8508	68.5452	38	2.04677
2021-01-13 19:30:00	351.812	15.8423	6.34	115.734	1.14	3.74625	410.692	1.2392	1.35	27.8	0.324901	554.434	89.8497	41.096	69.4818	38	2.03893
2021-01-13 20:30:00	350.562	15.549	5.42	119.51	1.14	3.75397	404.804	1.2392	1.35	27.8	0.314884	546.486	87.762	40.5127	80.3631	38	1.99413
2021-01-13 21:30:00	347.312	14.226	5.42	120.968	1.14	3.78192	410.211	1.2392	1.35	27.8	0.270204	553.785	84.1926	40.3442	70.056	38	2.03451
2021-01-13 22:30:00	346.5	15.6166	4.27	119.31	1.14	3.80986	409.493	1.2392	1.35	27.8	0.293	552.815	83.2149	1.1259	0.407039	38	2.50346
2021-01-13 23:30:00	341.875	15.7959	5.34	118.479	1.14	3.83781	420.086	1.2392	1.35	28.06	0.287185	567.116	84.627	39.2855	71.464	38	2.06195
2021-01-14 00:30:00	339	16.0943	4.96	115.697	1.14	3.86575	422.683	1.2392	1.35	28.06	0.2828	570.622	82.9937	41.2126	74.7812	38	2.06477
2021-01-14 01:30:00	339	16.5721	5.32	112.549	1.14	3.8937	423.59	1.2392	1.35	28.06	0.294798	571.846	84.2003	43.9368	71.3379	38	2.08004
2021-01-14 02:30:00	340.188	15.6982	4.51	118.781	1.14	3.09	411.481	1.2392	1.35	29.44	0.289296	555.499	88.5922	42.8986	72.2849	38	2.05116
2021-01-14 03:30:00	340.562	15.8998	5.08	103.868	1.14	3.09	415.39	1.2392	1.35	29.44	0.289893	560.777	88.3847	39.2185	75.4949	38	2.11229
2021-01-14 04:30:00	339.375	16.2094	4.12	97.8088	1.14	3.09	409.951	1.2392	1.35	29.44	0.291459	553.434	86.3246	38.7815	76.9096	38	2.13882
2021-01-14 05:30:00	338.188	16.6817	6.22	101.804	1.14	3.09	403.109	1.2392	1.35	29.44	0.326498	544.197	92.7206	39.7546	74.4305	38	2.13182
2021-01-14 06:30:00	334.625	15.8899	6.22	118.262	1.14	3.09	413.199	1.2392	1.35	29.44	0.301531	557.819	93.1288	39.3596	59.4672	38	2.13242
2021-01-14 07:30:00	337.375	15.572	7.09	136.003	1.14	3.09	421.091	1.2392	1.35	29.44	0.306843	568.472	97.7476	38.8431	75.0088	38	1.99876
2021-01-14 08:30:00	338.438	16.2857	5.15448	109.195	1.14	3.09	414.852	1.2392	1.35	29.44	0.299701	560.05	89.6536	42.6481	76.623	38	2.08143
2021-01-14 09:30:00	346.875	14.789	5.07172	108.853	1.14	3.09	409.837	1.2392	1.35	29.44	0.277775	553.28	88.1991	40.1366	73.5075	38	2.07281
2021-01-14 10:30:00	268.75	14.7079	4.98897	4.48266	1.14	3.09	357.664	1.2392	1.35	29.44	0.195415	482.846	70.2754	39.6974	74.975	38	3.11889
2021-01-14 11:30:00	78.9375	15.1254	4.32	110.586	1.14	3.09	54.6409	1.2392	1.35	29.44	0.777193	73.7652	141.36	43.0277	74.3175	38	3.75923
2021-01-14 12:30:00	359.062	14.8657	3.36	112.964	1.14	3.09	416.177	1.2392	1.35	29.44	0.272509	561.839	84.445	45.4149	73.8137	38	1.99613
2021-01-14 13:30:00	346.938	12.6898	5.6	119.073	1.14	3.09	404.967	1.2392	1.35	29.44	0.241114	546.705	88.1469	46.4798	75.6028	38	2.00374
2021-01-14 14:30:00	347.938	16.6512	5.6	125.715	1.14	3.09	410.13	1.2392	1.35	29.44	0.334853	553.675	94.2108	45.0827	76.1062	38	1.97862
2021-01-14 15:30:00	346.875	15.7504	4.58	126.833	1.14	3.09	415.292	1.2392	1.35	29.44	0.297385	560.644	89.8418	46.0251	74.7648	38	1.97923
2021-01-14 16:30:00	347.625	15.0093	4	126.403	1.14	3.43365	414.052	1.2392	1.35	28.71	0.274242	558.97	84.35	46.1158	75.5229	38	1.97565
2021-01-14 17:30:00	348.812	15.7491	5.18	124.094	1.14	3.4424	410.99	1.2392	1.35	28.71	0.307883	554.836	89.2761	46.6356	75.4465	38	1.97888
2021-01-14 18:30:00	346	13.5598	6.11	133.466	1.14	3.45115	416.701	1.2392	1.35	28.71	0.258979	562.547	89.1512	46.0334	75.0073	38	1.95705
2021-01-14 19:30:00	348.812	12.7089	4.68976	121.855	1.14	3.4599	402.338	1.2392	1.35	28.71	0.233708	543.156	82.2111	45.1775	74.6484	38	1.99454
2021-01-14 20:30:00	350.25	16.1641	5.36	125.059	1.14	3.46865	399.867	1.2392	1.35	28.71	0.33416	539.82	91.4759	45.4914	73.2588	38	1.98145
2021-01-14 21:30:00	346.688	15.6681	5.36	135.359	1.14	3.4774	401.816	1.2392	1.35	28.71	0.319469	542.451	91.5942	44.5622	74.1044	38	1.95556
2021-01-14 22:30:00	297.25	16.2215	6.08	133.846	1.14	3.48615	399.949	1.2392	1.35	28.71	0.283959	539.931	91.2881	43.2005	75.8643	38	2.13006
2021-01-14 23:30:00	356.688	12.874	4.73	125.391	1.14	3.4949	417.113	1.2392	1.35	26.18	0.258348	563.102	82.9394	43.9124	75.3826	38	1.95788
2021-01-15 00:30:00	357.75	14.55	5.07	134.808	1.14	3.50833	412.189	1.2392	1.35	26.18	0.319616	556.455	89.451	46.6524	75.5787	38	1.91236
2021-01-15 01:30:00	354.062	16.0699	5.98646	132.927	1.14	3.52833	411.517	1.2392	1.35	26.18	0.368461	555.548	94.1869	43.377	73.9083	38	1.94545
2021-01-15 02:30:00	347.375	16.5021	5.97317	136.522	1.14	3.54833	413.333	1.2392	1.35	28.41	0.337501	558	93.3345	43.621	74.2597	38	1.9517
2021-01-15 03:30:00	346.5	15	5.95989	127.611	1.14	3.56833	407.056	1.2392	1.35	28.41	0.300607	549.525	90.2952	46.6359	74.21	38	1.97739
2021-01-15 04:30:00	350.562	13.4142	5.94661	135.875	1.14	3.58833	400.778	1.2392	1.35	28.41	0.274179	541.05	89.6216	43.6889	75.9353	38	1.9386
2021-01-15 05:30:00	348.125	15.8887	5.93332	132.147	1.14	3.60833	400.485	1.2392	1.35	28.41	0.333671	540.654	92.6585	43.7687	75.2386	38	1.96153
2021-01-15 06:30:00	347.562	16.5662	5.72	129.495	1.14	3.62833	400.191	1.2392	1.35	28.41	0.346714	540.258	92.4244	44.2754	74.6659	38	1.97319
2021-01-15 07:30:00	349	15.5987	5.72	133.927	1.14	3.64833	399.898	1.2392	1.35	28.41	0.325232	539.862	91.6291	42.3448	75.2783	38	1.95671
2021-01-15 08:30:00	342.625	15.8628	4.71	134.639	1.14	3.66053	399.66	1.2392	1.35	28.41	0.31325	539.54	88.3459	42.8578	74.8616	38	1.97414
2021-01-15 09:30:00	350.438	11.7532	4.8	134.271	1.14	3.66179	399.421	1.2392	1.35	28.41	0.21574	539.219	80.2418	42.5186	74.3554	38	1.9533
2021-01-15 10:30:00	354.5	15.4168	5.28	123.026	1.14	3.66305	404.984	1.2392	1.35	28.41	0.310652	546.728	88.289	42.4112	75.473	38	1.978
2021-01-15 11:30:00	359.875	15.156	5.89224	147.929	1.14	3.66432	417.666	1.2392	1.35	25.61	0.354113	563.849	93.7513	42.4346	76.8146	38	1.87073
2021-01-15 12:30:00	356.688	15.439	5.95953	108.372	1.14	3.66558	414.793	1.2392	1.35	25.61	0.34102	559.971	88.8073	44.87	76.2071	38	2.01526
2021-01-15 13:30:00	362.5	15.5607	6.24849	105.226	1.14	3.66684	418.306	1.2392	1.35	25.61	0.34859	564.714	89.3749	44.2255	74.2052	38	2.01667
2021-01-15 14:30:00	344.938	16.143	6.23844	113.722	1.14	3.66811	420.94	1.2392	1.35	25.61	0.344267	568.269	89.9776	43.4382	76.1441	38	2.03949
2021-01-15 15:30:00	350.875	15.3609	6.22838	115.254	1.14	3.66937	411.654	1.2392	1.35	25.61	0.341906	555.733	90.2847	43.4529	73.175	38	2.02338
2021-01-15 16:30:00	349.188	16.7665	6.59	117.717	1.14	4.25	415.211	1.2392	1.35	23.58	0.402093	560.535	90.7763	43.6917	75.0071	38	2.01266
2021-01-15 17:30:00	347.5	15.8262	6.59	133.718	1.14	4.25	421.661	1.2392	1.35	23.58	0.371237	569.243	90.6069	49.5528	73.4909	38	1.94514
2021-01-15 18:30:00	347.688	15.7122	5.26	130.988	1.14	4.25	417.714	1.2392	1.35	23.58	0.353358	563.914	86.0092	43.2631	75.4249	38	1.96814
2021-01-15 19:30:00	360.688	16.6414	5.86	132.806	1.14	4.25	421.826	1.2392	1.35	23.58	0.406014	569.465	90.8306	45.8453	69.8263	38	1.93035
2021-01-15 20:30:00	362.125	16.1428	6.25	131.816	1.14	4.25	420.464	1.2392	1.35	23.58	0.398506	567.626	91.2438	44.0411	75.1269	38	1.91872
2021-01-15 21:30:00	354.25	15.3672	3.46	114.858	1.14	4.25	421.838	1.2392	1.35	23.58	0.315821	569.481	77.904	46.5643	75.4973	38	1.99554
2021-01-15 22:30:00	347.188	12.5085	3.46	115.019	1.14	4.25	414.909	1.2392	1.35	23.58	0.223135	560.127	67.8622	44.9184	76.1542	38	2.02173
2021-01-15 23:30:00	349.312	16.825	3.87	113.789	1.14	3.43	413.997	1.2392	1.35	28.34	0.320511	558.896	86.3783	44.6655	75.4801	38	2.02242
2021-01-16 00:30:00	347.062	15.1948	6.07	113.804	1.14	3.43	401.816	1.2392	1.35	28.34	0.310855	542.451	90.6186	45.8583	75.1878	38	2.02693
2021-01-16 01:30:00	346.438	15.1837	5.21	110.658	1.14	3.43	409.339	1.2392	1.35	28.34	0.292181	552.608	86.9893	46.52	74.8428	38	2.04022
2021-01-16 02:30:00	350.625	15.1983	5.21	117.422	1.14	3.43	409.98	1.2392	1.35	28.34	0.299405	553.473	88.1289	46.975	75.3003	38	1.99714
2021-01-16 03:30:00	348	15.7709	4.73455	111.255	1.14	3.75	415.562	1.2392	1.35	29.03	0.280983	561.008	83.3797	46.6198	73.8139	38	2.03572
2021-01-16 04:30:00	343.875	15.3734	4.72091	114.974	1.14	3.75	414.647	1.2392	1.35	29.03	0.268965	559.774	82.677	42.9624	74.9562	38	2.04396
2021-01-16 05:30:00	350	14.8982	5.16	112.894	1.14	3.75	408.097	1.2392	1.35	29.03	0.273736	550.931	83.9603	44.2645	74.8079	38	2.02718
2021-01-16 06:30:00	347.812	15.6767	4.72734	118.488	1.14	3.75	401.547	1.2392	1.35	29.03	0.296138	542.089	85.4695	44.9788	74.4875	38	2.01175
2021-01-16 07:30:00	346.688	15.0065	4.65832	112.685	1.14	3.75	405.199	1.2392	1.35	29.03	0.271152	547.018	82.7645	43.7739	75.0839	38	2.04003
2021-01-16 08:30:00	348.562	14.9627	4.84	111.57	1.14	3.75	408.851	1.2392	1.35	29.03	0.269559	551.948	82.8149	44.444	75.3616	38	2.03472
2021-01-16 09:30:00	351.5	14.8243	5.3	118.112	1.14	3.75	407.239	1.2392	1.35	29.03	0.277929	549.773	85.1264	46.0215	75.4581	38	1.9943
2021-01-16 10:30:00	349	15.9546	5.3	113.967	1.14	3.75	413.437	1.2392	1.35	29.03	0.295095	558.14	85.8697	44.3336	75.0028	38	2.02553
2021-01-16 11:30:00	350.75	16.0257	5.78	106.534	1.14	3.75417	422.073	1.2392	1.35	29.03	0.290502	569.799	85.4879	46.2533	74.5427	38	2.04351
2021-01-16 12:30:00	343.875	15.419	5.46	115.061	1.14	3.76042	415.117	1.2392	1.35	30.35	0.262466	560.408	84.1939	43.423	71.1298	38	2.05528
2021-01-16 13:30:00	350.25	15.431	6.86	111.684	1.14	3.76667	424.083	1.2392	1.35	30.35	0.270818	572.512	87.0662	46.8134	74.005	38	2.02509
2021-01-16 14:30:00	350.5	15.9975	5.25	112.766	1.14	3.77292	423.554	1.2392	1.35	30.35	0.271419	571.798	84.0043	42.2822	71.5794	38	2.04378
2021-01-16 15:30:00	348.75	15.0437	4.25	119.193	1.14	3.77917	428.11	1.2392	1.35	30.35	0.237021	577.948	79.2437	43.6417	47.6929	38	2.10393
2021-01-16 16:30:00	348.812	16.5979	5.89	110.616	1.14	3.78542	423.734	1.2392	1.35	28.93	0.303599	572.041	86.7822	40.6146	61.5556	38	2.09985
2021-01-16 17:30:00	346.875	15.5165	5.89	114.012	1.14	3.79167	426.755	1.2392	1.35	28.93	0.273664	576.119	84.7444	42.3806	73.1491	38	2.04564
2021-01-16 18:30:00	343.875	15.693	6.47	119.727	1.14	3.79792	418.285	1.2392	1.35	28.93	0.291359	564.685	88.2017	42.4886	68.9528	38	2.04762
2021-01-16 19:30:00	338.562	15.0075	4.82	108.295	1.14	3.8	423.746	1.2392	1.35	28.93	0.24362	572.056	79.351	46.7529	76.7827	38	2.06947
2021-01-16 20:30:00	340.375	15.2058	5.15	112.387	1.14	3.8	425.597	1.2392	1.35	28.93	0.252946	574.556	81.2347	42.4081	76.6637	38	2.06238
2021-01-16 21:30:00	336.812	15.147	5.15	114.014	1.14	3.8	424.298	1.2392	1.35	28.93	0.249708	572.802	81.1094	45.8141	82.117	38	2.03758
2021-01-16 22:30:00	339.25	15.8094	6.65	115.415	1.14	3.8	405.37	1.2392	1.35	28.93	0.302402	547.249	89.2655	45.5852	76.6842	38	2.04317
2021-01-16 23:30:00	341.25	14.6239	5.48	109.949	1.14	4.0899	421.083	1.2392	1.35	25.84	0.271134	568.462	79.8072	43.5921	69.7363	38	2.08958
2021-01-17 00:30:00	336.438	16.6228	5.6585	119.88	1.14	4.11365	414.306	1.2392	1.35	25.84	0.334519	559.314	86.449	44.9871	73.738	38	2.04755
2021-01-17 01:30:00	340	11.9629	5.69	124.413	1.14	4.1374	421.108	1.2392	1.35	25.84	0.204437	568.496	73.8352	40.4853	71.6192	38	2.04027
2021-01-17 02:30:00	336.688	12.9075	5.33	114.923	1.14	4.16115	421.951	1.2392	1.35	29.75	0.183432	569.634	71.5301	44.0681	76.6796	38	2.0593
2021-01-17 03:30:00	336.125	15.7258	6.47	119.77	1.14	4.1849	404.803	1.2392	1.35	29.75	0.277881	546.483	85.4693	43.4288	75.2486	38	2.04923
2021-01-17 04:30:00	340.062	16.6102	7.59	115.937	1.14	4.20865	422.243	1.2392	1.35	29.75	0.29209	570.028	87.6931	48.9027	77.1173	38	2.02556
2021-01-17 05:30:00	337.938	15.819	6.88	113.24	1.14	4.2324	420.765	1.2392	1.35	29.75	0.264222	568.033	83.5245	43.9065	62.287	38	2.11399
2021-01-17 06:30:00	340.562	16.0354	5.86	126.864	1.14	4.25615	415.441	1.2392	1.35	29.75	0.274268	560.846	83.7971	47.599	67.0648	38	2.02015
2021-01-17 07:30:00	338.812	16.4153	6.31049	120.673	1.14	4.26479	407.103	1.2392	1.35	29.75	0.29172	549.588	85.7597	43.3624	66.9772	38	2.06536
2021-01-17 08:30:00	338.125	11.7867	6.19981	116.314	1.14	4.25229	411.618	1.2392	1.35	29.75	0.17253	555.685	71.5667	47.5125	65.93	38	2.0744
2021-01-17 09:30:00	336.125	15.8915	6.81	119.829	1.14	4.23979	414.618	1.2392	1.35	29.75	0.273035	559.735	85.1181	46.7533	61.7947	38	2.0847
2021-01-17 10:30:00	338.438	13.8179	6.81	124.263	1.14	4.22729	398.934	1.2392	1.35	29.75	0.244774	538.561	83.8622	47.5825	66.5004	38	2.03943
2021-01-17 11:30:00	338.219	14.3451	5.58	122.009	1.14	4.21479	403.863	1.2392	1.35	29.75	0.239182	545.215	79.9617	47.5715	72.3924	38	2.02887
2021-01-17 12:30:00	338	14.899	5.16	114.176	1.14	4.20229	409.566	1.2392	1.35	30.34	0.234155	552.914	78.0015	43.7426	77.1839	38	2.05706
2021-01-17 13:30:00	338.906	16.1163	4.45	115.909	1.14	4.18979	402.201	1.2392	1.35	30.34	0.265866	542.971	80.1882	44.0274	50.0335	38	2.14437
2021-01-17 14:30:00	339.812	15.3744	5.65	124.786	1.14	4.17729	400.483	1.2392	1.35	30.34	0.266506	540.653	83.6762	41.6368	68.9311	38	2.04474
2021-01-17 15:30:00	337.562	15.3723	6.37	113.385	1.14	4.17	399.225	1.2392	1.35	30.34	0.266942	538.954	84.1182	47.231	69.3973	38	2.07694
2021-01-17 16:30:00	338.875	15.5935	5.35	129.25	1.14	3.61	381.539	1.2392	1.35	26.92	0.350904	515.077	92.0773	46.6864	69.2914	38	2.01228
2021-01-17 17:30:00	339	16.3989	4.79	125.62	1.14	3.61	387.698	1.2392	1.35	26.92	0.35702	523.392	90.4858	43.622	77.4932	38	2.00853
2021-01-17 18:30:00	340.75	13.4571	6.07	126.434	1.14	3.61	398.725	1.2392	1.35	26.92	0.280318	538.279	88.582	45.4984	79.4036	38	1.98723
2021-01-17 19:30:00	338.75	15.8623	4.93	118.808	1.14	3.61	401.526	1.2392	1.35	26.92	0.323238	542.059	87.7807	32.8271	63.6972	38	2.12328
2021-01-17 20:30:00	338.062	14.8789	5.29	121.729	1.14	3.61	401.897	1.2392	1.35	26.92	0.300896	542.56	87.3719	30.1767	79.9104	38	2.06466
2021-01-17 21:30:00	339.125	16.1884	5.29	127.458	1.14	3.61	415.542	1.2392	1.35	26.92	0.323742	560.982	89.055	29.8815	79.6449	38	2.04021
2021-01-17 22:30:00	336.25	15.7698	6.42	123.615	1.14	3.61	417.433	1.2392	1.35	26.92	0.317675	563.534	90.8841	31.6415	80.556	38	2.05608
2021-01-17 23:30:00	338.062	15.0535	5.85111	141.242	1.14	3.9	418.457	1.2392	1.35	30.13	0.258336	564.917	86.4041	31.0974	79.0674	38	1.98901
2021-01-18 00:30:00	339.188	15.6235	6.81	114.49	1.14	3.9	413.897	1.2392	1.35	30.13	0.273532	558.761	86.8989	30.6185	79.635	38	2.08944
2021-01-18 01:30:00	337.188	15.4909	6.81	117.928	1.14	3.9	412.604	1.2392	1.35	30.13	0.271482	557.015	87.2287	30.6597	79.6777	38	2.08225
2021-01-18 02:30:00	344.875	15.7069	5.84	122.485	1.14	3.9	408.165	1.2392	1.35	30.13	0.282522	551.023	86.5902	30.3579	78.9536	38	2.04067
2021-01-18 03:30:00	350.062	12.5063	6.83	121.311	1.14	3.07	406.541	1.2392	1.35	27.37	0.272756	548.83	93.5864	30.0599	80.585	38	2.02301
2021-01-18 04:30:00	351.812	14.5013	5.35	114.524	1.14	3.07	408.562	1.2392	1.35	27.37	0.306422	551.559	90.6709	30.2178	80.7725	38	2.04225
2021-01-18 05:30:00	341.688	11.6051	6.46	114.527	1.14	3.07	410.583	1.2392	1.35	27.37	0.230681	554.287	88.2558	31.5812	79.8006	38	2.0763
2021-01-18 06:30:00	339.812	7.5343	5.49077	113.397	1.14	3.07	416.152	1.2392	1.35	27.37	0.113194	561.806	67.9834	31.4033	79.2537	38	2.09022
2021-01-18 07:30:00	352.375	15.5649	5.58308	114.302	1.14	3.07	418.969	1.2392	1.35	27.37	0.325646	565.608	91.9146	31.5097	79.7543	38	2.04024
2021-01-18 08:30:00	346	16.6039	4.34	135.373	1.14	3.07	420.225	1.2392	1.35	27.37	0.338988	567.303	91.6194	31.1227	81.3396	38	1.9775
2021-01-18 09:30:00	351.25	15.9201	5.14	138.232	1.14	3.07	420.863	1.2392	1.35	27.37	0.337354	568.166	93.8152	30.9453	80.3118	38	1.95421
2021-01-18 10:30:00	363.5	15.5032	5.14	129.803	1.14	3.07	418.778	1.2392	1.35	27.37	0.339233	565.35	93.146	29.8508	79.2516	38	1.95268
2021-01-18 11:30:00	363.312	16.5606	3.37	127.408	1.14	3.07	415.673	1.2392	1.35	27.37	0.350787	561.159	89.5464	31.0685	75.4189	38	1.97024
2021-01-18 12:30:00	326.312	16.0086	5.88011	115.662	1.14	3.47	406.038	1.2392	1.35	29.69	0.285061	548.151	88.8098	29.1156	65.6802	38	2.19145
2021-01-18 13:30:00	361.688	15.6083	5.01	109.869	1.14	3.47	410.416	1.2392	1.35	29.69	0.29945	554.062	87.2574	28.4436	68.4419	38	2.07561
2021-01-18 14:30:00	206.75	15.7022	5.01	124.402	1.14	3.47	303.512	1.2392	1.35	29.69	0.23597	409.741	88.4245	29.7776	79.0724	38	2.6492
2021-01-18 15:30:00	366.312	15.3369	4.04	123.552	1.14	3.47	398.558	1.2392	1.35	29.69	0.30622	538.054	87.0723	30.6248	84.7473	38	1.94655
2021-01-18 16:30:00	335.438	16.4167	5.24	109.594	1.14	3.47	399.817	1.2392	1.35	29.69	0.303024	539.754	88.1831	30.0558	84.3731	38	2.10818
2021-01-18 17:30:00	345.188	16.2761	5.91	109.888	1.14	3.47	399.335	1.2392	1.35	29.69	0.317503	539.102	90.453	29.5763	81.8798	38	2.08241
2021-01-18 18:30:00	346.562	15.3788	5.69	110.99	1.14	3.47	412.324	1.2392	1.35	29.69	0.282159	556.637	87.493	29.9477	83.8872	38	2.06464
2021-01-18 19:30:00	299.75	15.4622	4.11	111.184	1.14	3.47	403.114	1.2392	1.35	29.69	0.228982	544.203	79.8257	29.6385	84.1517	38	2.24285
2021-01-18 20:30:00	348.312	16.4842	6.17	120.819	1.14	3.46048	392.389	1.2392	1.35	29.69	0.342465	529.725	93.8082	32.2495	84.8103	38	2.00925
2021-01-18 21:30:00	366.5	18.7963	6.17	121.09	1.14	3.44619	408.386	1.2392	1.35	29.69	0.403671	551.321	95.917	30.5979	106.631	38	1.8882
2021-01-18 22:30:00	156.312	15.4507	4.44	1.26659	1.14	3.4319	164.13	1.2392	1.35	29.69	0.285506	221.576	77.769	29.4864	71.0412	38	4.6917
2021-01-18 23:30:00	147.375	16.7707	5.88	120.957	1.14	3.41762	172.473	1.2392	1.35	29.19	0.414382	232.838	113.95	28.5892	83.6112	38	3.04879
2021-01-19 00:30:00	357.188	16.3485	4.99025	138.367	1.14	3.40333	407.765	1.2392	1.35	29.19	0.334845	550.483	92.1398	31.77	83.1811	38	1.92385
2021-01-19 01:30:00	350.5	16.2707	5.01275	126.196	1.14	3.38905	416.208	1.2392	1.35	29.19	0.311774	561.88	89.6649	28.5664	94.354	38	1.9631
2021-01-19 02:30:00	347.938	16.3291	5.03525	115.656	1.14	3.37476	416.607	1.2392	1.35	29.19	0.306314	562.419	88.511	30.6249	92.3936	38	2.01026
2021-01-19 03:30:00	349.5	16.0364	5.05775	123.651	1.14	4.15	413.872	1.2392	1.35	28.38	0.295389	558.727	83.5702	29.0149	98.2598	38	1.96166
2021-01-19 04:30:00	346.312	14.7248	5.08025	125.995	1.14	4.15	399.35	1.2392	1.35	28.38	0.274957	539.122	82.4983	31.3203	93.7869	38	1.97022
2021-01-19 05:30:00	340.75	15.8055	5.10275	122.394	1.14	4.15	400.777	1.2392	1.35	28.38	0.293857	541.049	83.7801	28.6358	103.773	38	1.97783
2021-01-19 06:30:00	356.875	15.4747	5.12525	125.368	1.14	4.15	399.933	1.2392	1.35	28.38	0.306865	539.91	85.1417	28.2965	93.8108	38	1.94852
2021-01-19 07:30:00	357.562	13.6891	5.14775	119.709	1.14	4.15	399.779	1.2392	1.35	28.38	0.256746	539.701	80.3419	31.3617	94.2167	38	1.95573
2021-01-19 08:30:00	363.812	15.9099	5.15	122.702	1.14	4.15	400.385	1.2392	1.35	28.38	0.325686	540.519	86.3134	30.7162	97.3568	38	1.9181
2021-01-19 09:30:00	358.125	16.927	5.15	116.59	1.14	4.15	399.287	1.2392	1.35	28.38	0.345265	539.038	87.1305	30.1002	99.0416	38	1.95394
2021-01-19 10:30:00	360.25	16.8577	5.15	126.052	1.14	4.15	404.343	1.2392	1.35	28.38	0.34384	545.862	87.7101	28.1292	99.2667	38	1.91938
2021-01-19 11:30:00	367.875	15.1483	5.15	117.601	1.14	4.15	416.504	1.2392	1.35	28.38	0.288435	562.281	82.594	25.9854	75.6321	38	2.00775
2021-01-19 12:30:00	364.188	13.9908	5.15	118.147	1.14	3.42	416.963	1.2392	1.35	27.26	0.287923	562.9	86.7095	26.1784	86.051	38	1.98295
2021-01-19 13:30:00	368.5	16.364	5.15	124.337	1.14	3.42	413.788	1.2392	1.35	27.26	0.364162	558.614	91.9611	24.0866	88.6045	38	1.94529
2021-01-19 14:30:00	358.938	15.2098	5.15	125.703	1.14	3.42	421.256	1.2392	1.35	27.26	0.313654	568.695	89.0665	26.0544	89.0254	38	1.96299
2021-01-19 15:30:00	359.125	14.9133	5.15	124.163	1.14	3.42	421.525	1.2392	1.35	27.26	0.305057	569.059	88.3578	26.168	91.2997	38	1.96039
2021-01-19 16:30:00	358.312	16.8149	5.15	115.753	1.14	4.13	419.26	1.2392	1.35	28.66	0.314533	566.001	84.6846	25.7537	92.5095	38	1.99132
2021-01-19 17:30:00	337.375	19.6441	5.15	118.739	1.14	4.13	424.593	1.2392	1.35	28.66	0.352561	573.201	87.3921	25.8701	89.8819	38	2.05915
2021-01-19 18:30:00	330.344	16.23	5.15	116.968	1.14	4.13	425.606	1.2392	1.35	28.66	0.260763	574.568	80.0901	23.7138	87.1718	38	2.10903
2021-01-19 19:30:00	323.312	16.46	5.15	119.893	1.14	4.13	412.592	1.2392	1.35	28.66	0.272645	557	81.7856	25.3863	95.2117	38	2.08718
2021-01-19 20:30:00	336.25	16.6424	5.15	122.368	1.14	4.13	405.339	1.2392	1.35	28.66	0.302053	547.207	84.6513	25.0326	94.3148	38	2.03629
2021-01-19 21:30:00	338.812	16.0431	5.15	123.889	1.14	4.13	411.428	1.2392	1.35	28.66	0.283974	555.427	83.1638	24.9577	93.3004	38	2.02538
2021-01-19 22:30:00	336.938	16.1108	5.15	118.11	1.14	4.13	404.251	1.2392	1.35	28.66	0.288927	545.739	83.2496	24.7075	90.8707	38	2.06381
2021-01-19 23:30:00	328.875	15.0887	5.15	123.541	1.14	3.55052	414.941	1.2392	1.35	22.41	0.350107	560.17	88.5685	25.0483	90.4501	38	2.07069
2021-01-20 00:30:00	333.188	17.1544	5.17783	123.315	1.14	3.53427	411.187	1.2392	1.35	22.41	0.427719	555.103	93.0917	24.7963	89.8248	38	2.05951
2021-01-20 01:30:00	341.938	16.2923	4.12	124.172	1.14	3.51802	405.152	1.2392	1.35	22.41	0.409362	546.955	90.0682	24.7762	93.5485	38	2.01355
2021-01-20 02:30:00	340.938	15.8545	5.24	120.465	1.14	3.50177	403.613	1.2392	1.35	26.8	0.332184	544.877	89.7398	28.7048	101.299	38	1.99219
2021-01-20 03:30:00	336.75	14.1332	3.96	118.352	1.14	3.48552	399.268	1.2392	1.35	26.8	0.27174	539.012	82.4783	28.163	96.8643	38	2.03082
2021-01-20 04:30:00	337.5	12.3221	3.96	114.33	1.14	3.46927	408.404	1.2392	1.35	26.8	0.214725	551.346	76.2927	31.0427	93.7759	38	2.04468
2021-01-20 05:30:00	340.375	15.1681	4.17	118.892	1.14	3.45302	410.654	1.2392	1.35	26.8	0.294653	554.383	84.7942	29.7145	95.2268	38	2.01678
2021-01-20 06:30:00	338.906	14.8363	5.38114	125.234	1.14	3.43677	409.087	1.2392	1.35	26.8	0.302133	552.267	88.9359	29.4661	93.0747	38	2.00557
2021-01-20 07:30:00	337.438	16.1602	5.36163	122.77	1.14	3.43	406.909	1.2392	1.35	26.8	0.33645	549.327	90.8335	28.9495	96.4619	38	2.01025
2021-01-20 08:30:00	341.438	12.5603	4.4	123.014	1.14	3.43	408.057	1.2392	1.35	26.8	0.234278	550.876	80.6508	28.6932	92.9781	38	2.00845
2021-01-20 09:30:00	338	16.6929	4.18	109.066	1.14	3.43	410.679	1.2392	1.35	26.8	0.328808	554.417	86.5894	28.4732	91.5654	38	2.08078
2021-01-20 10:30:00	332.75	15.5351	4.18	103.092	1.14	3.43	410.03	1.2392	1.35	26.8	0.290805	553.54	83.4551	28.6408	98.113	38	2.10005
2021-01-20 11:30:00	328.5	15.4255	4.85	114.464	1.14	3.43	410.415	1.2392	1.35	26.8	0.29345	554.06	85.9909	24.3073	94.1898	38	2.09839
2021-01-20 12:30:00	330.812	16.7591	5.97	110.166	1.14	3.57	418.396	1.2392	1.35	29.47	0.292389	564.835	87.787	24.0846	92.3302	38	2.1155
2021-01-20 13:30:00	336	15.4611	5.06	103.88	1.14	3.65	411.422	1.2392	1.35	29.47	0.262666	555.419	82.7609	26.1974	86.7686	38	2.13573
2021-01-20 14:30:00	338.75	9.429	5.06	103.239	1.14	3.65	421.527	1.2392	1.35	29.47	0.116552	569.061	61.1949	23.3097	94.0608	38	2.11182
2021-01-20 15:30:00	330.062	16.2629	3.66	111.027	1.14	3.65	417.331	1.2392	1.35	29.47	0.259479	563.397	80.2607	25.0018	90.8192	38	2.11683
2021-01-20 16:30:00	340.375	15.6439	6.12	128.809	1.14	4.19542	419.66	1.2392	1.35	28.2806	0.281899	566.542	84.8227	24.0884	101.849	38	1.97632
2021-01-20 17:30:00	349.625	12.5037	7.15	121.745	1.14	4.19042	414.986	1.2392	1.35	28.3031	0.22329	560.231	80.9897	24.4034	101.14	38	1.97373
2021-01-20 18:30:00	347.125	15.1756	6.35	117.085	1.14	4.18542	411.384	1.2392	1.35	28.3256	0.282766	555.368	84.4415	24.4131	86.6474	38	2.04811
2021-01-20 19:30:00	337.375	17.3496	4.29	122.48	1.14	4.18042	418.765	1.2392	1.35	28.3481	0.299279	565.333	81.9413	24.6802	84.7817	38	2.06626
2021-01-20 20:30:00	336.312	16.9294	5.35	120.539	1.14	4.17542	417.002	1.2392	1.35	28.3706	0.299409	562.953	83.9886	24.7195	92.9654	38	2.04898
2021-01-20 21:30:00	338.25	17.1304	5.35	125.258	1.14	4.17042	416.666	1.2392	1.35	28.3931	0.309165	562.499	85.2157	24.4601	96.3446	38	2.01345
2021-01-20 22:30:00	331.875	17.4241	4.28	126.624	1.14	4.16542	418.345	1.2392	1.35	28.4156	0.295566	564.766	82.0264	24.4279	88.751	38	2.05595
2021-01-20 23:30:00	353.625	17.3426	5.26	121.956	1.14	4.16042	420.024	1.2392	1.35	28.4381	0.327249	567.032	86.0457	24.7685	94.978	38	1.97875
2021-01-21 00:30:00	350.688	14.6373	4.28	112.055	1.14	4.16	407.952	1.2392	1.35	28.44	0.253428	550.735	77.3296	24.5754	93.4998	38	2.03148
2021-01-21 01:30:00	346.5	13.6868	4.89	120.943	1.14	4.16	409.967	1.2392	1.35	28.44	0.231755	553.456	76.9196	24.4863	92.7657	38	2.01419
2021-01-21 02:30:00	347.906	13.1194	4.89	115.524	1.14	4.16	409.527	1.2392	1.35	28.44	0.216666	552.862	74.6381	24.7217	95.1431	38	2.02144
2021-01-21 03:30:00	349.312	16.6812	6.37	119.027	1.14	3.6	408.145	1.2392	1.35	26.74	0.369231	550.996	93.3613	24.3438	94.6687	38	2.00622
2021-01-21 04:30:00	341.438	15.4399	5.23	115.233	1.14	3.6	410.014	1.2392	1.35	26.74	0.309651	553.518	86.9381	24.5945	96.2076	38	2.04141
2021-01-21 05:30:00	339.375	17.3656	5.52	122.631	1.14	3.6	415.881	1.2392	1.35	26.74	0.357455	561.44	91.0577	24.5505	94.2125	38	2.02662
2021-01-21 06:30:00	333.375	16.4664	5.52	114.231	1.14	3.6	418.027	1.2392	1.35	26.74	0.31984	564.337	87.9226	24.4443	91.5422	38	2.09079
2021-01-21 07:30:00	332.125	14.9461	5.42	122.022	1.14	3.6	415.124	1.2392	1.35	26.74	0.28535	560.417	86.1431	24.4994	83.9298	38	2.09052
2021-01-21 08:30:00	337.438	14.0575	5.42	116.964	1.14	3.6	415.727	1.2392	1.35	26.74	0.265329	561.231	83.9432	24.4216	92.5558	38	2.06173
2021-01-21 09:30:00	338.625	15.983	6.58	117.994	1.14	3.6	416.33	1.2392	1.35	26.74	0.328623	562.045	91.2543	24.4954	94.4887	38	2.04652
2021-01-21 10:30:00	339.812	16.5649	6.58	120.917	1.14	3.6	410.525	1.2392	1.35	26.74	0.354078	554.209	93.2192	24.4279	97.4212	38	2.02131
2021-01-21 11:30:00	335.625	17.1318	5.72	123.716	1.14	3.6	407.191	1.2392	1.35	26.74	0.359869	549.708	91.9987	23.9273	95.631	38	2.03246
2021-01-21 12:30:00	342.938	15.959	5.37	123.467	1.14	4.18	413.231	1.2392	1.35	28.0229	0.292978	557.862	83.6863	23.6965	92.1702	38	2.02114
2021-01-21 13:30:00	338.688	15.9218	4.48	129.992	1.14	4.18	408.905	1.2392	1.35	28.0279	0.284776	552.022	81.7071	23.2045	97.7564	38	1.9936
2021-01-21 14:30:00	344	16.1772	5.18698	124.835	1.14	4.18	411.337	1.2392	1.35	28.0329	0.300623	555.305	84.0932	24.9046	78.4713	38	2.05497
2021-01-21 15:30:00	339.75	15.7459	5.2707	130.988	1.14	4.18	409.669	1.2392	1.35	28.0379	0.289886	553.054	84.0259	24.873	86.1926	38	2.01917
2021-01-21 16:30:00	346.562	15.9984	5.84667	126.736	1.14	3.93	410.465	1.2392	1.35	28.0429	0.315189	554.127	88.3377	24.8644	85.1011	38	2.01627
2021-01-21 17:30:00	349.5	16.485	5.95193	128.193	1.14	3.93	410.043	1.2392	1.35	28.0479	0.333754	553.559	89.9403	24.5647	82.8189	38	2.00952
2021-01-21 18:30:00	343.938	16.4012	6.05719	120.678	1.14	3.93	410.17	1.2392	1.35	28.0529	0.321776	553.729	88.6081	23.9084	85.6735	38	2.05009
2021-01-21 19:30:00	337.438	18.6056	5.04296	124.986	1.14	3.93	410.296	1.2392	1.35	28.0579	0.360654	553.9	89.2771	23.802	85.6357	38	2.05612
2021-01-21 20:30:00	338.5	16.4561	6.57	128.666	1.14	3.93	410.423	1.2392	1.35	28.06	0.325854	554.071	90.9474	23.8303	88.4603	38	2.0282
2021-01-21 21:30:00	339.562	17.1423	6.57	128.108	1.14	3.93	410.083	1.2392	1.35	28.06	0.344696	553.612	91.9902	26.0618	88.0077	38	2.02074
2021-01-21 22:30:00	342.5	17.1494	5.35	129.537	1.14	3.89714	421.713	1.2392	1.35	19.44	0.502334	569.312	94.652	25.9659	83.3206	38	2.02147
2021-01-21 23:30:00	355.188	16.9154	5.51	128.455	1.14	3.70625	404.975	1.2392	1.35	19.44	0.55671	546.717	98.4796	26.057	101.758	38	1.92518
2021-01-22 00:30:00	339.562	13.9598	7.11	121.258	1.14	3.71875	418.264	1.2392	1.35	19.44	0.408157	564.657	94.5169	25.9974	94.5459	38	2.02525
2021-01-22 01:30:00	330.062	16.4429	5.75	126.712	1.14	3.73125	416.564	1.2392	1.35	19.44	0.470847	562.362	94.8457	25.5836	95.2439	38	2.03545
2021-01-22 02:30:00	328.062	16.4457	6.2	123.891	1.14	3.74375	418.121	1.2392	1.35	21.04	0.425855	564.464	93.7421	25.0439	92.4088	38	2.06525
2021-01-22 03:30:00	336.438	16.6677	6.6	120.697	1.14	3.75625	412.353	1.2392	1.35	21.04	0.459883	556.677	96.0541	25.1086	98.2218	38	2.02857
2021-01-22 04:30:00	344.312	15.1515	6.6	129.441	1.14	3.76875	414.26	1.2392	1.35	21.04	0.422725	559.25	95.346	24.8218	84.0023	38	2.0173
2021-01-22 05:30:00	336.938	16.8322	4.64	130.188	1.14	3.78125	412.775	1.2392	1.35	21.04	0.442216	557.247	91.4191	24.8056	98.7106	38	1.99023
2021-01-22 06:30:00	361	16.7754	6.02	118.713	1.14	3.79375	412.062	1.2392	1.35	21.04	0.496176	556.284	95.8955	24.5843	101.65	38	1.94644
2021-01-22 07:30:00	327.5	16.8417	5.5	119.897	1.14	3.8	415.515	1.2392	1.35	21.04	0.427666	560.945	91.511	24.7613	100.692	38	2.05515
2021-01-22 08:30:00	357.938	15.8232	3.45	109.093	1.14	3.8	412.961	1.2392	1.35	21.04	0.413503	557.498	85.638	24.4409	93.473	38	2.01892
2021-01-22 09:30:00	367.688	17.5054	5.84	108.066	1.14	3.8	409.526	1.2392	1.35	21.04	0.530368	552.86	95.849	24.9476	92.7778	38	1.99109
2021-01-22 10:30:00	359.625	15.03	5.84	111.465	1.14	3.8	406.091	1.2392	1.35	21.04	0.429991	548.223	91.7601	24.7336	102.763	38	1.97298
2021-01-22 11:30:00	328.875	15.7288	6.25757	102.229	1.14	3.8	410.163	1.2392	1.35	21.04	0.397851	553.72	89.6045	24.9237	94.8698	38	2.14397
2021-01-22 12:30:00	329.625	15.8116	6.20351	101.57	1.14	3.5625	419.309	1.2392	1.35	30.34	0.258189	566.067	85.0795	24.8444	96.9441	38	2.13643
2021-01-22 13:30:00	340.25	16.6086	5.43	102.119	1.14	3.5725	419.912	1.2392	1.35	30.34	0.280614	566.881	85.4054	24.975	87.6048	38	2.12877
2021-01-22 14:30:00	341.125	16.2872	6.86	99.284	1.14	3.5825	413.689	1.2392	1.35	30.34	0.289867	558.48	88.4023	24.5739	86.2618	38	2.14421
2021-01-22 15:30:00	339.562	16.4466	5.52901	101.577	1.14	3.5925	409.682	1.2392	1.35	30.34	0.286481	553.071	86.0788	24.3795	102.157	38	2.08248
2021-01-22 16:30:00	338	16.7401	5.5422	107.414	1.14	3.6025	412.733	1.2392	1.35	29.36	0.301672	557.189	87.2205	24.3642	80.509	38	2.14353
2021-01-22 17:30:00	337.438	16.2575	5.55538	101.051	1.14	3.6125	417.459	1.2392	1.35	29.36	0.281863	563.57	85.0147	24.3182	81.8145	38	2.16868
2021-01-22 18:30:00	337.438	15.7033	5.91	100.035	1.14	3.6225	356.856	1.2392	1.35	29.36	0.340965	481.756	91.0141	24.4954	81.8325	38	2.17243
2021-01-22 19:30:00	339.062	16.8347	6.61	100.05	1.14	3.6325	401.587	1.2392	1.35	29.36	0.322097	542.142	89.8196	24.2957	93.5061	38	2.12252
2021-01-22 20:30:00	342.5	15.6836	6.31	99.6655	1.14	3.64	412.689	1.2392	1.35	29.36	0.283377	557.13	86.292	24.9216	92.2268	38	2.11383
2021-01-22 21:30:00	339.562	17.2439	6.31	105.979	1.14	3.64	408.279	1.2392	1.35	29.36	0.325293	551.177	89.9015	25.8852	91.5617	38	2.09716
2021-01-22 22:30:00	340.062	17.0175	4.80735	100.338	1.14	3.64	413.632	1.2392	1.35	29.36	0.299699	558.404	84.9053	25.781	91.2018	38	2.12062
2021-01-22 23:30:00	341.312	17.1235	4.73556	120.823	1.14	4.15	410.518	1.2392	1.35	29.11	0.303395	554.199	83.7475	25.5917	89.1097	38	2.0409
2021-01-23 00:30:00	353.5	16.0313	5.23083	120.431	1.14	4.15	402.046	1.2392	1.35	29.11	0.30506	542.762	85.0508	25.7141	92.2177	38	1.99071
2021-01-23 01:30:00	347	13.6853	5.31017	125.473	1.14	4.15	410.212	1.2392	1.35	29.11	0.232241	553.786	78.8386	25.8691	84.7203	38	2.01754
2021-01-23 02:30:00	339	16.2713	5.81846	116.605	1.14	4.15	409.131	1.2392	1.35	29.11	0.289949	552.326	84.5158	25.2926	84.9034	38	2.08166
2021-01-23 03:30:00	370.562	16.6145	5.72089	128.593	1.14	4.15	410.037	1.2392	1.35	29.11	0.340035	553.551	88.9969	24.4196	95.527	38	1.90202
2021-01-23 04:30:00	350.062	17.2959	5.1	118.678	1.14	3.85	409.637	1.2392	1.35	28.86	0.333716	553.01	87.9666	24.6453	87.3969	38	2.02845
2021-01-23 05:30:00	352.25	17.8535	6.15	125.87	1.14	3.85	409.812	1.2392	1.35	28.86	0.364348	553.246	92.5033	24.5781	91.7557	38	1.9798
2021-01-23 06:30:00	327.812	15.7073	5.05	119.194	1.14	3.85	403.915	1.2392	1.35	28.86	0.273942	545.285	83.7243	24.0239	93.7408	38	2.08405
2021-01-23 07:30:00	350.188	15.9888	6.15	121.387	1.14	3.85	410.353	1.2392	1.35	28.86	0.311607	553.977	88.9773	25.0553	87.1403	38	2.01708
2021-01-23 08:30:00	369.875	15.2893	5.87	118.356	1.14	3.85	405.344	1.2392	1.35	28.86	0.317143	547.215	88.566	26.1867	88.9797	38	1.9546
2021-01-23 09:30:00	345.875	16.336	6.9	127.458	1.14	3.85	407.683	1.2392	1.35	28.86	0.32938	550.372	92.5947	23.8763	86.7576	38	2.01357
2021-01-23 10:30:00	359.938	16.3099	6.9	119.396	1.14	3.85	412.994	1.2392	1.35	28.86	0.334419	557.542	91.6613	26.0887	84.2914	38	1.99824
2021-01-23 11:30:00	338	15.6322	6.9	124.536	1.14	3.85	412.375	1.2392	1.35	28.86	0.295905	556.707	89.9785	26.0166	89.9299	38	2.03349
2021-01-23 12:30:00	330.125	16.6028	5.51616	125.093	1.14	3.40948	409.737	1.2392	1.35	25.49	0.358752	553.146	92.2876	25.718	96.5828	38	2.03651
2021-01-23 13:30:00	332.562	13.6885	5.47642	126.126	1.14	3.42573	412.282	1.2392	1.35	25.49	0.279549	556.58	87.1216	25.3306	88.2055	38	2.05429
2021-01-23 14:30:00	327.812	16.3107	5.93	126.595	1.14	3.44198	420.376	1.2392	1.35	25.49	0.339607	567.508	91.8799	1.02969	115.536	38	2.05843
2021-01-23 15:30:00	329.75	15.4937	5.93	120.124	1.14	3.45823	410.218	1.2392	1.35	25.49	0.328329	553.794	90.7167	23.7027	91.5925	38	2.08216
2021-01-23 16:30:00	349.562	18.4827	5.59642	127.001	1.14	3.47448	417.918	1.2392	1.35	22.81	0.486838	564.189	96.9714	25.786	91.857	38	1.98009
2021-01-23 17:30:00	347.562	16.6813	6.42	115.238	1.14	3.49073	423.601	1.2392	1.35	22.81	0.420439	571.861	94.5924	25.3214	88.1524	38	2.04553
2021-01-23 18:30:00	342.688	16.2065	5.45	111.39	1.14	3.50698	418.218	1.2392	1.35	22.81	0.391415	564.595	90.764	25.1267	87.2823	38	2.08182
2021-01-23 19:30:00	365.188	17.273	6.42	117.596	1.14	3.52323	416.131	1.2392	1.35	22.81	0.478943	561.776	97.2947	24.8446	83.1093	38	1.9957
2021-01-23 20:30:00	354.812	17.222	6.42	120.438	1.14	3.53948	414.909	1.2392	1.35	22.81	0.464099	560.128	97.038	24.2931	77.9564	38	2.03881
2021-01-23 21:30:00	356.938	16.695	6.42	97.4322	1.14	3.55573	419.457	1.2392	1.35	22.81	0.427281	566.267	92.615	24.2027	80.1351	38	2.11723
2021-01-23 22:30:00	354.25	16.1809	5.01	54.0203	1.14	3.57198	416.65	1.2392	1.35	22.81	0.37256	562.478	83.3901	23.5773	81.1847	38	2.3277
2021-01-23 23:30:00	132.438	16.097	5.76	2.20603	1.14	3.58823	171.061	1.2392	1.35	29.84	0.217355	230.932	70.2585	25.3354	75.3268	38	5.1431
2021-01-24 00:30:00	336	16.2248	5.01	124.497	1.14	3.60448	412.477	1.2392	1.35	29.84	0.284443	556.844	86.698	24.494	60.395	38	2.15308
2021-01-24 01:30:00	367	14.7428	5.32	126.033	1.14	3.62073	411.538	1.2392	1.35	29.84	0.285813	555.576	87.5747	25.8214	49.5281	38	2.0678
2021-01-24 02:30:00	347.75	12.915	6.39	99.6746	1.14	3.63698	416.513	1.2392	1.35	28.36	0.228193	562.293	81.023	0.8567	0.367691	38	2.6195
2021-01-24 03:30:00	339.812	15.1678	5.63	105.194	1.14	3.65323	407.334	1.2392	1.35	28.36	0.281201	549.901	85.0831	24.2633	26.961	38	2.3716
2021-01-24 04:30:00	347.188	15.5462	4.75	108.182	1.14	3.66	415.246	1.2392	1.35	28.36	0.283939	560.582	83.6338	26.4092	100.844	38	2.02719
2021-01-24 05:30:00	339.812	13.4896	5.8	108.145	1.14	3.66	394.278	1.2392	1.35	28.36	0.254873	532.275	83.932	25.679	83.4064	38	2.11784
2021-01-24 06:30:00	341	16.1224	4.12	147.481	1.14	3.66	395.49	1.2392	1.35	28.36	0.321234	533.912	88.4735	23.2612	84.4179	38	1.96462
2021-01-24 07:30:00	338.688	14.8821	4.44	146.768	1.14	3.66	405.831	1.2392	1.35	28.36	0.279185	547.872	86.0625	25.0851	90.3033	38	1.95012
2021-01-24 08:30:00	271.812	16.5791	4.44	144.243	1.14	3.66	407.824	1.2392	1.35	28.36	0.236891	550.562	82.0786	24.8416	87.6144	38	2.20845
2021-01-24 09:30:00	339.562	17.5057	4.72	144.377	1.14	3.66	415.75	1.2392	1.35	28.36	0.336642	561.262	90.1448	24.5154	88.9247	38	1.96212
2021-01-24 10:30:00	346.375	15.2312	4.72	135.769	1.14	3.66	423.676	1.2392	1.35	28.3595	0.276974	571.963	85.1579	24.2706	90.3412	38	1.96795
2021-01-24 11:30:00	327	16.2675	3.32	133.864	1.14	3.66	430.826	1.2392	1.35	28.3539	0.257437	581.615	79.809	24.1821	88.2785	38	2.04672
2021-01-24 12:30:00	332.375	12.4832	5.18	131.483	1.14	3.95198	423.525	1.2392	1.35	28.3483	0.191124	571.759	74.6624	24.4925	80.1302	38	2.06477
2021-01-24 13:30:00	330.312	15.5052	4.87	133.067	1.14	3.93823	426.804	1.2392	1.35	28.3427	0.255391	576.185	81.434	24.1923	75.2215	38	2.08418
2021-01-24 14:30:00	329	16.1826	5.51	130.213	1.14	3.92448	416.393	1.2392	1.35	28.337	0.286811	562.131	85.8111	24.1725	56.1935	38	2.17241
2021-01-24 15:30:00	335.5	16.1566	5.98	133.512	1.14	3.91073	412.084	1.2392	1.35	28.3314	0.305849	556.313	88.9308	24.1714	77.9217	38	2.05459
2021-01-24 16:30:00	336.75	15.5827	5.03062	119.532	1.14	3.89698	410.337	1.2392	1.35	29.5	0.266111	553.955	82.8722	24.2174	81.4938	38	2.09388
2021-01-24 17:30:00	341.625	11.5718	5.1315	123.681	1.14	3.88323	411.776	1.2392	1.35	29.5	0.176827	555.897	73.3523	23.7505	94.4087	38	2.01703
2021-01-24 18:30:00	330.625	15.1441	6.23	123.032	1.14	3.86948	425.421	1.2392	1.35	29.5	0.248538	574.319	84.0986	25.3998	85.1451	38	2.08417
2021-01-24 19:30:00	336.062	13.0017	4.87	116.275	1.14	3.85573	429.405	1.2392	1.35	29.5	0.186989	579.697	73.1846	25.2911	86.5611	38	2.08761
2021-01-24 20:30:00	352.125	15.5634	5.16	121.671	1.14	3.85928	415.161	1.2392	1.35	29.5	0.280637	560.467	84.6675	23.9181	87.734	38	2.01133
2021-01-24 21:30:00	344.5	15.4418	5.076	117.772	1.14	3.87518	414.141	1.2392	1.35	29.5	0.267659	559.09	82.9846	24.3427	89.1951	38	2.04591
2021-01-24 22:30:00	331.375	16.2759	5.00443	110.53	1.14	3.89108	416.573	1.2392	1.35	29.5	0.266339	562.374	81.9252	26.1738	79.3481	38	2.15276
2021-01-24 23:30:00	358.188	15.2263	6.79	114.825	1.14	3.90699	418.392	1.2392	1.35	21.43	0.417874	564.829	92.7426	20.3368	86.5026	38	2.03345
2021-01-25 00:30:00	333.125	16.1535	5.80282	114.406	1.14	3.92289	419.539	1.2392	1.35	21.43	0.394944	566.377	89.0819	19.893	84.7785	38	2.13261
2021-01-25 01:30:00	377.312	14.2805	5.75129	118.159	1.14	3.9388	422.592	1.2392	1.35	21.43	0.39242	570.499	89.0395	19.584	83.47	38	1.97017
2021-01-25 02:30:00	349.438	15.4823	5.69975	112.657	1.14	3.9547	418.279	1.2392	1.35	21.43	0.396132	564.676	88.6047	19.2939	84.543	38	2.08317
2021-01-25 03:30:00	357.125	18.2922	4.97	121.873	1.14	3.67	412.379	1.2392	1.35	21.68	0.516634	556.712	95.4524	19.2092	90.0243	38	2.00199
2021-01-25 04:30:00	343.875	15.1627	3.73	117.981	1.14	3.67	402.416	1.2392	1.35	21.68	0.38041	543.262	85.9296	20.9683	93.4867	38	2.04408
2021-01-25 05:30:00	346.062	14.4043	5.5	120.223	1.14	3.67	409.693	1.2392	1.35	21.68	0.372326	553.085	89.5628	24.4732	96.8094	38	2.00495
2021-01-25 06:30:00	354.125	14.8715	6.02	118.562	1.14	3.67	414.866	1.2392	1.35	21.68	0.398993	560.069	91.9931	23.8168	93.6067	38	1.99732
2021-01-25 07:30:00	379.5	16.0049	4.74	115.094	1.14	3.67	414.289	1.2392	1.35	21.68	0.460963	559.291	92.0232	24.0836	87.6093	38	1.94696
2021-01-25 08:30:00	375.562	15.6226	6.1	111.856	1.14	3.67	415.33	1.2392	1.35	21.68	0.454277	560.695	94.1179	23.963	83.2963	38	1.98544
2021-01-25 09:30:00	347.438	15.7707	4.83	119.735	1.14	3.67	414.625	1.2392	1.35	21.68	0.405154	559.744	89.7308	24.0477	82.7227	38	2.05143
2021-01-25 10:30:00	343.812	15.6141	6	112.9	1.14	3.67	408.549	1.2392	1.35	21.68	0.414407	551.541	92.3049	23.8155	101.136	38	2.0282
2021-01-25 11:30:00	343.438	15.8426	6	104.102	1.14	3.67	405.044	1.2392	1.35	21.68	0.42102	546.809	91.7325	26.3062	88.4485	38	2.10063
2021-01-25 12:30:00	350.75	13.5985	4.64	100.034	1.14	3.97125	404.26	1.2392	1.35	28.3425	0.23544	545.751	76.3526	23.6452	89.1701	38	2.09796
2021-01-25 13:30:00	346.062	16.8882	5.13	100.216	1.14	3.95625	405.515	1.2392	1.35	28.3463	0.319395	547.445	84.806	23.7975	76.1066	38	2.16309
2021-01-25 14:30:00	351.75	17.3909	6	103.828	1.14	3.94125	402.84	1.2392	1.35	28.35	0.352865	543.835	88.9349	24.6834	84.0959	38	2.09329
2021-01-25 15:30:00	363.188	14.6881	5.2	123.657	1.14	3.92625	401.931	1.2392	1.35	28.3538	0.297043	542.607	85.668	24.3826	99.2085	38	1.93038
2021-01-25 16:30:00	378.562	15.9927	4.29	126.779	1.14	3.91125	405.671	1.2392	1.35	28.3575	0.338528	547.655	86.838	23.8798	83.8581	38	1.92095
2021-01-25 17:30:00	373.688	16.4897	5.31	126.143	1.14	3.89625	404.356	1.2392	1.35	28.3612	0.35932	545.88	90.2782	23.9288	85.0167	38	1.93442
2021-01-25 18:30:00	361.625	16.928	5.94	113.416	1.14	3.88125	405.284	1.2392	1.35	28.365	0.355783	547.134	90.1982	23.4286	76.1312	38	2.05221
2021-01-25 19:30:00	355.75	15.1381	5.02	113.396	1.14	3.86625	405.218	1.2392	1.35	28.3688	0.2924	547.044	84.2604	24.9791	80.6481	38	2.05162
2021-01-25 20:30:00	351.5	15.3198	6.24	105.553	1.14	3.86167	405.152	1.2392	1.35	28.3592	0.300291	546.955	86.4987	24.7913	88.8404	38	2.0698
2021-01-25 21:30:00	341.75	15.9575	6.24	119.544	1.14	3.86452	405.085	1.2392	1.35	28.3429	0.31304	546.865	88.9719	24.3869	85.7381	38	2.06032
2021-01-25 22:30:00	342.188	14.9614	6.54	120.839	1.14	3.86738	404.374	1.2392	1.35	28.3267	0.292778	545.905	88.4332	25.8168	85.5777	38	2.04923
2021-01-25 23:30:00	334.625	14.5305	5.744	121.064	1.14	3.87024	405.027	1.2392	1.35	28.3104	0.264812	546.786	84.3067	23.4242	97.8733	38	2.04027
2021-01-26 00:30:00	340.875	16.3075	5.92	118.084	1.14	3.8731	410.85	1.2392	1.35	28.2942	0.310633	554.647	87.6956	34.9106	89.5422	38	2.01984
2021-01-26 01:30:00	338.312	16.1064	5.58	122.408	1.14	3.87595	415.151	1.2392	1.35	28.2779	0.296527	560.454	86.2454	35.1797	72.9125	38	2.06808
2021-01-26 02:30:00	338.938	16.1548	5.58	119.308	1.14	3.87881	407.894	1.2392	1.35	28.2617	0.305253	550.658	86.7598	34.1392	89.795	38	2.02342
2021-01-26 03:30:00	345	15.4736	5.09747	116.295	1.14	4.17	408.246	1.2392	1.35	28.2454	0.280055	551.132	81.6652	33.2844	85.5891	38	2.03167
2021-01-26 04:30:00	354.312	15.6002	6.12	113.828	1.14	4.17	407.679	1.2392	1.35	28.24	0.303947	550.366	85.4667	33.6192	87.3694	38	2.00274
2021-01-26 05:30:00	352.688	16.1159	5.994	114.79	1.14	4.17	401.619	1.2392	1.35	28.24	0.322392	542.185	86.8464	35.05	90.9152	38	1.98813
2021-01-26 06:30:00	357.625	15.9205	6.66	111.613	1.14	4.17	418.265	1.2392	1.35	28.24	0.308018	564.658	86.2662	33.3866	95.0264	38	1.97593
2021-01-26 07:30:00	354.5	14.9444	7.22	114.859	1.14	4.17	421.077	1.2392	1.35	28.24	0.283038	568.454	85.765	37.1476	88.9028	38	1.9817
2021-01-26 08:30:00	364.062	14.4819	4.43	112.854	1.14	4.17	427.388	1.2392	1.35	28.24	0.247432	576.974	76.4671	33.5991	92.0822	38	1.95956
2021-01-26 09:30:00	359.625	15.21	5.51	117.849	1.14	4.17	410.102	1.2392	1.35	28.24	0.292771	553.638	83.6834	33.5208	90.5215	38	1.96078
2021-01-26 10:30:00	347.062	15.0987	5.51	116.579	1.14	4.17	417.079	1.2392	1.35	28.24	0.267438	563.057	81.1507	33.6384	93.8612	38	1.99484
2021-01-26 11:30:00	327.875	16.076	4.81	121.767	1.14	4.17	414.897	1.2392	1.35	28.24	0.267244	560.111	80.1975	36.046	93.8071	38	2.03136
2021-01-26 12:30:00	338.5	15.4674	5.93	114.021	1.14	3.45469	423.058	1.2392	1.35	29.42	0.271988	571.128	87.287	33.3581	95.5391	38	2.0285
2021-01-26 13:30:00	337.938	14.6055	5.3	117.931	1.14	3.46094	406.07	1.2392	1.35	29.42	0.263589	548.194	86.1292	33.0221	91.7748	38	2.0292
2021-01-26 14:30:00	339.812	14.4757	4.79	114.499	1.14	3.46719	408.427	1.2392	1.35	29.42	0.253849	551.377	83.7121	32.9201	87.9611	38	2.04964
2021-01-26 15:30:00	382.375	15.9435	5.49	123.619	1.14	3.47344	422.338	1.2392	1.35	29.42	0.330526	570.157	90.9431	36.0775	95.7492	38	1.8497
2021-01-26 16:30:00	371.938	14.5274	4.07	126.457	1.14	3.47969	417.182	1.2392	1.35	30.16	0.268215	563.196	84.3174	35.9221	85.8802	38	1.89965
2021-01-26 17:30:00	365.375	17.5988	5.71	120.541	1.14	3.48594	412.027	1.2392	1.35	30.16	0.355583	556.236	92.7703	33.8472	91.3615	38	1.9296
2021-01-26 18:30:00	367.312	15.7301	6.19	117.829	1.14	3.49219	406.871	1.2392	1.35	30.16	0.32026	549.276	91.8242	32.715	76.228	38	1.98465
2021-01-26 19:30:00	386.438	17.1909	4.44	122.197	1.14	3.49844	423.278	1.2392	1.35	30.16	0.345428	571.425	89.6129	32.9204	74.5854	38	1.91361
2021-01-26 20:30:00	303.188	14.6782	5.48	121.021	1.14	3.5	409.693	1.2392	1.35	30.16	0.2218	553.085	83.1381	32.9298	76.9613	38	2.19909
2021-01-26 21:30:00	329.25	18.1703	5.48	113.378	1.14	3.5	412.447	1.2392	1.35	30.16	0.319451	556.804	89.6705	33.4078	87.1995	38	2.09251
2021-01-26 22:30:00	332.812	15.9146	5.13	110.773	1.14	3.5	406.095	1.2392	1.35	30.16	0.275429	548.228	85.9818	34.1309	80.3524	38	2.11269
2021-01-26 23:30:00	332.75	16.6986	5.7	114.252	1.14	3.81	409.314	1.2392	1.35	27.5	0.320353	552.574	87.6098	33.4096	82.3769	38	2.09368
2021-01-27 00:30:00	368.312	15.7022	6.0321	105.665	1.14	3.81	401.15	1.2392	1.35	27.5	0.346596	541.552	89.2525	34.6277	84.3222	38	1.99399
2021-01-27 01:30:00	350.938	15.9287	6.02242	109.887	1.14	3.81	404.185	1.2392	1.35	27.5	0.329982	545.649	88.5782	37.0066	85.404	38	2.02431
2021-01-27 02:30:00	335.812	15.8658	5.15	103.961	1.14	3.81	404.631	1.2392	1.35	27.5	0.298057	546.252	84.0362	32.0563	78.2735	38	2.14606
2021-01-27 03:30:00	346.25	15.8576	6.91	107.553	1.14	3.43	426.637	1.2392	1.35	30.4	0.280835	575.96	89.5549	35.9504	49.0179	38	2.18802
2021-01-27 04:30:00	349.188	15.8022	6	115.5	1.14	3.43	418.762	1.2392	1.35	30.4	0.286542	565.329	89.2455	35.0346	79.9261	38	2.03382
2021-01-27 05:30:00	347	15.0751	5.12	130.225	1.14	3.43	404.585	1.2392	1.35	30.4	0.279534	546.19	88.7281	33.4298	85.0025	38	1.97395
2021-01-27 06:30:00	351.188	15.4017	5.85	116.544	1.14	3.43	407.736	1.2392	1.35	30.4	0.289524	550.443	89.5698	33.2118	74.1691	38	2.04892
2021-01-27 07:30:00	344.875	17.6568	6.72	109.883	1.14	3.43	409.26	1.2392	1.35	30.4	0.337972	552.501	93.2209	35.4154	79.6574	38	2.07068
2021-01-27 08:30:00	354.375	15.4598	4.78	108.559	1.14	3.43	406.165	1.2392	1.35	30.4	0.283291	548.323	86.1936	35.6565	82.6515	38	2.03171
2021-01-27 09:30:00	346.375	15.9692	5.22	113.681	1.14	3.43	415.707	1.2392	1.35	30.4	0.282966	561.205	87.2771	35.7788	78.0272	38	2.05465
2021-01-27 10:30:00	349.625	15.2728	5.22	121.528	1.14	3.43	410.635	1.2392	1.35	30.4	0.278342	554.357	87.8458	35.1197	82.4169	38	2.00063
2021-01-27 11:30:00	350.375	16.0377	5.02705	132.739	1.14	3.43	410.555	1.2392	1.35	30.4	0.299625	554.25	89.8427	32.1808	82.9397	38	1.96458
2021-01-27 12:30:00	343.188	15.5885	5.0959	136.422	1.14	3.84	421.62	1.2392	1.35	24.33	0.339256	569.186	87.8191	32.2736	82.8296	38	1.9742
2021-01-27 13:30:00	327.312	16.0159	5.89	125.8	1.14	3.84	420.256	1.2392	1.35	24.33	0.336201	567.346	88.5265	32.1048	75.4384	38	2.09555
2021-01-27 14:30:00	387.375	16.5863	6.25	130.18	1.14	3.84	410.136	1.2392	1.35	24.33	0.460689	553.684	96.5897	36.7675	81.2604	38	1.85343
2021-01-27 15:30:00	383.75	15.488	6.25	122.598	1.14	3.84	395.667	1.2392	1.35	24.33	0.435451	534.15	95.2139	36.4766	85.3773	38	1.87768
2021-01-27 16:30:00	191.375	16.7028	4.96	122.162	1.14	4.28	341.051	1.2392	1.35	23.14	0.220724	460.419	73.5683	33.0204	81.42	38	2.72264
2021-01-27 17:30:00	210.125	15.7768	4.96	119.148	1.14	4.28	212.322	1.2392	1.35	23.14	0.510922	286.635	102.223	36.7244	83.1978	38	2.6011
2021-01-27 18:30:00	349.688	16.7994	4.33	120.667	1.14	4.28	415.651	1.2392	1.35	23.14	0.384446	561.128	84.9742	35.4767	79.523	38	2.01211
2021-01-27 19:30:00	348.75	15.6875	6.01	107.679	1.14	4.28	416.993	1.2392	1.35	23.14	0.357856	562.941	85.2052	32.3345	81.0076	38	2.07198
2021-01-27 20:30:00	335.938	16.0327	6.2475	116.154	1.14	4.28	409.798	1.2392	1.35	23.14	0.368554	553.227	87.5998	32.3679	83.9099	38	2.07274
2021-01-27 21:30:00	338.625	15.4375	6.1725	119.978	1.14	4.28	411.438	1.2392	1.35	23.14	0.352674	555.441	86.7119	36.0155	83.575	38	2.03666
2021-01-27 22:30:00	347.312	15.854	6.0975	120.77	1.14	4.28	411.54	1.2392	1.35	23.14	0.378682	555.579	88.4146	36.3665	78.0619	38	2.02161
2021-01-27 23:30:00	348.75	15.435	5.4	110.675	1.14	3.6	412.272	1.2392	1.35	30.83	0.267934	556.567	85.408	36.3426	72.4209	38	2.07611
2021-01-28 00:30:00	346.875	15.3813	4.23	116.586	1.14	3.6	408.122	1.2392	1.35	30.83	0.260893	550.964	83.0603	36.1068	72.7459	38	2.05864
2021-01-28 01:30:00	353	15.3474	6.16	113.451	1.14	3.6	403.359	1.2392	1.35	30.83	0.286897	544.534	88.9027	46.5506	73.1062	38	2.01297
2021-01-28 02:30:00	354.625	13.8825	6.16	108.606	1.14	3.6	412.761	1.2392	1.35	30.83	0.242514	557.227	84.6264	43.6499	78.699	38	2.01701
2021-01-28 03:30:00	346.688	15.3069	4.64	118.526	1.14	3.37	408.562	1.2392	1.35	32.05	0.257602	551.559	85.8109	34.3933	79.252	38	2.03507
2021-01-28 04:30:00	348.969	15.6114	4.64	133.248	1.14	3.37	412.09	1.2392	1.35	32.05	0.268119	556.322	87.7512	32.7529	0.26581	38	2.26974
2021-01-28 05:30:00	351.25	15.7353	6.27	124.334	1.14	3.37	420.796	1.2392	1.35	32.05	0.276284	568.075	91.0118	36.8709	81.288	38	1.98281
2021-01-28 06:30:00	337.875	16.5159	4.8	117.283	1.14	3.37	414.264	1.2392	1.35	32.05	0.27042	559.256	86.8598	35.8651	79.0146	38	2.06629
2021-01-28 07:30:00	341.562	15.1818	6.31	118.854	1.14	3.37	399.009	1.2392	1.35	32.05	0.273497	538.662	91.0549	36.6385	89.7487	38	2.00813
2021-01-28 08:30:00	340.062	15.8803	6.31	122.875	1.14	3.37	403.07	1.2392	1.35	32.05	0.285172	544.144	92.0942	36.3587	91.3836	38	1.99346
2021-01-28 09:30:00	338.562	16.6819	5.59	122.746	1.14	3.37	412.136	1.2392	1.35	32.05	0.285458	556.383	90.1279	32.7457	90.4012	38	2.01414
2021-01-28 10:30:00	338.625	16.2134	5.59	123.691	1.14	3.37	401.022	1.2392	1.35	32.05	0.286862	541.38	90.6589	36.0038	65.8472	38	2.08396
2021-01-28 11:30:00	337.688	15.7495	3.77	116.147	1.14	3.38	384.999	1.2392	1.35	32.05	0.272518	519.748	85.356	36.0844	73.6348	38	2.08996
2021-01-28 12:30:00	327.312	14.4792	5.1	118.203	1.14	3.44	381.624	1.2392	1.35	30.15	0.265551	515.193	87.0357	32.3727	79.2345	38	2.11234
2021-01-28 13:30:00	329.781	16.0886	6.68	116.795	1.14	3.5	406.79	1.2392	1.35	30.15	0.29197	549.167	91.1139	35.4228	85.2135	38	2.07653
2021-01-28 14:30:00	332.25	15.7157	4.92	124.519	1.14	3.56	382.304	1.2392	1.35	30.15	0.297491	516.11	88.6556	32.5106	77.0759	38	2.07573
2021-01-28 15:30:00	330.625	16.5703	4.92	120.578	1.14	3.59833	426.793	1.2392	1.35	30.15	0.266801	576.17	84.598	35.8774	80.1742	38	2.0745
2021-01-28 16:30:00	331.625	17.0888	4.48	121.473	1.14	3.59333	413.865	1.2392	1.35	29.55	0.295109	558.718	85.9752	35.8998	82.7341	38	2.05828
2021-01-28 17:30:00	373.438	15.5599	4.98	122.874	1.14	3.58833	407.603	1.2392	1.35	29.55	0.317357	550.264	88.8081	36.0061	77.7155	38	1.93195
2021-01-28 18:30:00	352.875	16.5036	6.44	120.744	1.14	3.58333	421.239	1.2392	1.35	29.55	0.31642	568.672	91.3027	32.8058	82.5816	38	1.99995
2021-01-28 19:30:00	349.25	16.5105	6.21	122.629	1.14	3.57833	417.518	1.2392	1.35	29.55	0.315427	563.649	91.1106	36.2105	81.1238	38	1.99839
2021-01-28 20:30:00	359.812	16.6524	5.52706	119.668	1.14	3.57333	421.832	1.2392	1.35	29.55	0.31845	569.473	89.4373	33.0063	75.1917	38	2.00484
2021-01-28 21:30:00	369.125	16.6675	5.55059	127.448	1.14	3.56833	409.972	1.2392	1.35	29.55	0.346589	553.462	92.1332	35.354	75.9384	38	1.93667
2021-01-28 22:30:00	350.625	15.6506	5.57412	119.977	1.14	3.56333	413.568	1.2392	1.35	29.55	0.293643	558.317	88.2845	32.6108	76.8286	38	2.03035
2021-01-28 23:30:00	304.75	16.7399	5.87	131.728	1.14	3.56	411.365	1.2392	1.35	26.53	0.31404	555.343	90.6957	36.4436	79.132	38	2.1241
2021-01-29 00:30:00	384.562	15.7442	6.12	125.882	1.14	3.56	408.08	1.2392	1.35	26.53	0.39288	550.908	94.8395	35.8282	89.2885	38	1.8552
2021-01-29 01:30:00	345.375	13.7642	7.1	125.035	1.14	3.56	402.397	1.2392	1.35	26.53	0.307091	543.236	93.1003	32.0794	84.2745	38	2.00538
2021-01-29 02:30:00	339.25	16.7099	7.1	121.901	1.14	3.56	405.338	1.2392	1.35	26.53	0.374519	547.206	95.911	35.7901	85.5266	38	2.02122
2021-01-29 03:30:00	341.375	16.3189	6.64673	119.415	1.14	3.75333	404.876	1.2392	1.35	29.12	0.319093	546.582	91.1676	36.0807	86.8275	38	2.01825
2021-01-29 04:30:00	336.812	17.2642	6.25	117.983	1.14	3.85	405.272	1.2392	1.35	29.12	0.329029	547.117	90.151	32.543	82.4294	38	2.06689
2021-01-29 05:30:00	342.625	15.9058	4.21	115.421	1.14	3.85	420.657	1.2392	1.35	29.12	0.266005	567.887	80.7177	32.4595	84.9301	38	2.04835
2021-01-29 06:30:00	340.875	17.0597	4.9	120.884	1.14	3.85	424.196	1.2392	1.35	29.12	0.296155	572.665	84.9266	32.1614	81.0156	38	2.04743
2021-01-29 07:30:00	346.25	16.7168	5.66	117.947	1.14	3.85	422.402	1.2392	1.35	29.12	0.302136	570.243	86.6785	36.1655	85.9966	38	2.01003
2021-01-29 08:30:00	358.562	17.21	5.66	111.2	1.14	3.85	415.795	1.2392	1.35	29.12	0.333268	561.323	88.2778	36.0598	88.527	38	1.98681
2021-01-29 09:30:00	328.812	17.0508	5.1159	108.356	1.14	3.85	409.187	1.2392	1.35	29.12	0.294552	552.402	84.5115	32.1466	83.663	38	2.13288
2021-01-29 10:30:00	331.375	13.5984	5.11077	116.415	1.14	3.85	408.507	1.2392	1.35	29.12	0.219663	551.484	78.284	35.5649	77.74	38	2.09873
2021-01-29 11:30:00	339.875	17.2149	4.81	109.74	1.14	3.85	409.504	1.2392	1.35	29.12	0.309539	552.831	85.1677	35.6106	75.3276	38	2.1041
2021-01-29 12:30:00	345.062	9.8205	5.86	115.615	1.14	4.35	416.566	1.2392	1.35	27.84	0.129808	562.364	59.9731	35.4888	81.1298	38	2.04183
2021-01-29 13:30:00	343.75	16.6164	4.7	117.22	1.14	4.35	411.493	1.2392	1.35	27.84	0.300669	555.516	81.4095	35.5663	78.2566	38	2.0497
2021-01-29 14:30:00	344.125	15.3962	6.12	110.291	1.14	4.35	405.438	1.2392	1.35	27.84	0.286752	547.341	82.4712	35.548	77.819	38	2.07774
2021-01-29 15:30:00	355.625	16.053	6.40702	113.503	1.14	4.35	403.701	1.2392	1.35	27.84	0.325508	544.996	86.512	34.1076	76.4858	38	2.03453
2021-01-29 16:30:00	359.938	17.2937	6.33476	110.825	1.14	3.7075	411.77	1.2392	1.35	29.53	0.345818	555.889	91.1978	34.9227	75.0507	38	2.03235
2021-01-29 17:30:00	358.812	16.0314	6.26251	116.551	1.14	3.71875	400.752	1.2392	1.35	29.53	0.327438	541.016	90.942	34.7381	86.2135	38	1.978
2021-01-29 18:30:00	361.625	17.1735	5.70219	119.022	1.14	3.73	392.641	1.2392	1.35	29.53	0.366119	530.066	92.2779	34.785	85.7858	38	1.9612
2021-01-29 19:30:00	359.812	16.5419	5.72505	114.092	1.14	3.74125	403.169	1.2392	1.35	29.53	0.332021	544.278	89.6578	34.8632	78.8415	38	2.00766
2021-01-29 20:30:00	355.875	15.8373	6.08	114.84	1.14	3.7525	402.177	1.2392	1.35	29.53	0.314006	542.938	89.325	34.9104	80.8114	38	2.01122
2021-01-29 21:30:00	357.5	16.4761	6.08	109.908	1.14	3.76375	405.32	1.2392	1.35	29.53	0.325739	547.182	89.3583	34.9959	83.0901	38	2.01669
2021-01-29 22:30:00	349.25	15.3336	5.63522	110.387	1.14	3.775	403.747	1.2392	1.35	29.53	0.285427	545.058	85.7868	34.7989	83.2918	38	2.04286
2021-01-29 23:30:00	338.375	16.0928	5.56814	109.56	1.14	3.78625	404.462	1.2392	1.35	27.29	0.317407	546.023	86.8562	33.5107	81.9462	38	2.09388
2021-01-30 00:30:00	345.812	16.4413	5.06	114.754	1.14	3.79	408.073	1.2392	1.35	27.29	0.329029	550.899	87.0027	33.8935	80.6182	38	2.04991
2021-01-30 01:30:00	350.312	15.6278	5.41	117.704	1.14	3.79	409.929	1.2392	1.35	27.29	0.315505	553.404	87.036	33.9885	94.3473	38	1.97736
2021-01-30 02:30:00	120.438	16.3229	5.41	26.9162	1.14	3.79	149.816	1.2392	1.35	27.29	0.287269	202.251	80.6537	37.0864	95.6563	38	4.2689
2021-01-30 03:30:00	258.875	15.5869	6.93	114.675	1.14	3.29	308.107	1.2392	1.35	26.57	0.368944	415.944	101.05	33.4918	83.5806	38	2.39164
2021-01-30 04:30:00	349.75	16.4142	5.89458	113.668	1.14	3.29	408.129	1.2392	1.35	26.57	0.3658	550.974	93.28	33.8698	91.4058	38	2.00426
2021-01-30 05:30:00	344.125	16.8517	5.79288	113.55	1.14	3.29	402.954	1.2392	1.35	26.57	0.375806	543.988	93.6669	33.8471	92.1221	38	2.02119
2021-01-30 06:30:00	350.812	16.7381	6.12	111.227	1.14	3.29	422.607	1.2392	1.35	26.57	0.359211	570.52	92.7323	33.6583	88.9626	38	2.01887
2021-01-30 07:30:00	348.312	17.105	5.48	112.341	1.14	3.29	423.638	1.2392	1.35	26.57	0.358876	571.911	91.532	34.0891	93.2176	38	2.00731
2021-01-30 08:30:00	347.25	17.2657	6.05	120.963	1.14	3.29	417.809	1.2392	1.35	26.57	0.378808	564.042	94.6883	34.0063	100.75	38	1.9548
2021-01-30 09:30:00	353.938	12.6572	5.62	115.999	1.14	3.29	414.428	1.2392	1.35	26.57	0.259689	559.478	86.1715	32.9369	89.4369	38	1.99127
2021-01-30 10:30:00	339.562	16.8054	2.98	114.518	1.14	3.29	410.318	1.2392	1.35	26.57	0.331365	553.929	85.464	36.5611	90.0947	38	2.03058
2021-01-30 11:30:00	343.625	16.9277	2.98	117.4	1.14	3.29	419.125	1.2392	1.35	26.57	0.330548	565.819	85.4321	36.8724	94.9585	38	1.98885
2021-01-30 12:30:00	349.375	13.5625	4.08	110.326	1.14	3.45	416.183	1.2392	1.35	29.6	0.225504	561.847	79.1467	36.2344	89.5969	38	2.01636
2021-01-30 13:30:00	349.688	16.7583	3.21	122.703	1.14	3.51	422.124	1.2392	1.35	29.6	0.289817	569.868	83.4217	36.3107	86.7346	38	1.97807
2021-01-30 14:30:00	348.312	13.9008	4.36	121.286	1.14	3.51	420.758	1.2392	1.35	29.6	0.232858	568.024	80.8614	36.5812	93.374	38	1.96549
2021-01-30 15:30:00	354.188	16.2314	4.96	113.78	1.14	3.51	418.943	1.2392	1.35	29.6	0.298672	565.573	86.9734	35.5493	102.355	38	1.94884
2021-01-30 16:30:00	352.625	16.1881	4.71	119.27	1.14	4.02656	421.219	1.2392	1.35	23.5	0.366556	568.645	85.8105	36.765	84.5504	38	1.98684
2021-01-30 17:30:00	347.562	16.7951	4.24	118.292	1.14	4.03781	420.818	1.2392	1.35	23.5	0.372199	568.104	85.1245	33.7623	82.419	38	2.02438
2021-01-30 18:30:00	349.5	16.0652	4.45	112.393	1.14	4.04906	424.749	1.2392	1.35	23.5	0.346368	573.412	83.1264	33.557	84.1086	38	2.03562
2021-01-30 19:30:00	343.5	17.8376	5.26	115.646	1.14	4.06031	426.537	1.2392	1.35	23.5	0.400457	575.824	88.4403	33.7497	85.3999	38	2.03838
2021-01-30 20:30:00	340.812	16.2213	4.20934	117.052	1.14	4.07156	416.832	1.2392	1.35	23.5	0.347481	562.723	83.1175	33.9135	82.8088	38	2.0505
2021-01-30 21:30:00	330.125	14.334	4.26628	120.907	1.14	4.08281	407.127	1.2392	1.35	23.5	0.288233	549.621	78.6736	34.0936	93.4349	38	2.03496
2021-01-30 22:30:00	323	17.0058	6.06	130.749	1.14	4.09406	348.766	1.2392	1.35	23.5	0.489057	470.834	98.5138	33.7195	86.5982	38	2.04566
2021-01-30 23:30:00	383.125	16.7575	5.63	116.322	1.14	4.10531	409.688	1.2392	1.35	25.75	0.409	553.079	90.7273	33.8191	86.9048	38	1.90397
2021-01-31 00:30:00	361.188	17.1143	4.66	122.091	1.14	4.11656	419.229	1.2392	1.35	25.75	0.367558	565.96	86.6557	37.4708	86.1557	38	1.94198
2021-01-31 01:30:00	352.062	16.1993	5.49	125.769	1.14	4.12781	418.646	1.2392	1.35	25.75	0.340204	565.172	86.8123	33.259	87.0386	38	1.96803
2021-01-31 02:30:00	337.125	16.8054	4.2	122.507	1.14	4.13906	417.195	1.2392	1.35	25.75	0.322137	563.214	82.4614	33.6607	82.078	38	2.04514
2021-01-31 03:30:00	339.062	17.2089	6.39	122.129	1.14	4.15031	418.403	1.2392	1.35	26.34	0.349478	564.844	89.1112	33.4724	83.6614	38	2.03518
2021-01-31 04:30:00	339.5	16.9577	6.94	124.107	1.14	4.16156	415.373	1.2392	1.35	26.34	0.354229	560.753	90.8793	32.4148	82.6105	38	2.03318
2021-01-31 05:30:00	347.375	17.0117	6.24	126.203	1.14	4.17281	416.611	1.2392	1.35	26.34	0.357759	562.424	89.6858	32.1524	82.4079	38	2.00029
2021-01-31 06:30:00	359.875	14.8582	5.48227	117.809	1.14	4.18406	407.673	1.2392	1.35	26.34	0.310048	550.359	84.0569	32.3341	81.214	38	1.99398
2021-01-31 07:30:00	355.625	15.75	5.52261	118.074	1.14	4.19531	412.608	1.2392	1.35	26.34	0.324895	557.021	85.1053	35.7222	83.0757	38	1.98971
2021-01-31 08:30:00	359.688	17.1777	5.75	122.086	1.14	4.2	410.309	1.2392	1.35	26.34	0.379365	553.917	89.5834	35.1466	76.2258	38	1.98576
2021-01-31 09:30:00	337.375	16.3481	6.33105	120.174	1.14	4.2	409.522	1.2392	1.35	26.34	0.331759	552.854	87.593	35.0807	83.0114	38	2.04533
2021-01-31 10:30:00	343.25	16.7522	6.29158	119.794	1.14	4.2	408.735	1.2392	1.35	26.34	0.351313	551.792	88.798	35.3409	81.2193	38	2.03192
2021-01-31 11:30:00	348.5	17.463	5.31211	118.77	1.14	4.2	396.833	1.2392	1.35	26.34	0.384037	535.725	89.0451	1.10367	85.0392	38	2.1258
2021-01-31 12:30:00	348.438	16.118	5.16	110.415	1.14	3.35312	414.644	1.2392	1.35	22.77	0.403778	559.769	91.6386	36.7529	87.2821	38	2.02523
2021-01-31 13:30:00	337	17.4575	6.42	110.828	1.14	3.37562	416.918	1.2392	1.35	22.77	0.439208	562.839	95.6768	32.379	76.9433	38	2.11605
2021-01-31 14:30:00	325	16.6513	5.28	117.501	1.14	3.39812	419.192	1.2392	1.35	22.77	0.382742	565.91	91.135	36.2649	84.5661	38	2.09008
2021-01-31 15:30:00	358.812	17.6456	6.25	118.504	1.14	3.42062	417.891	1.2392	1.35	22.77	0.480583	564.153	97.5044	35.9049	87.6746	38	1.96246
2021-01-31 16:30:00	366.875	13.8715	6	111.161	1.14	3.44313	416.139	1.2392	1.35	28.26	0.28082	561.788	87.6054	32.0905	82.9689	38	1.99092
2021-01-31 17:30:00	344.938	17.3412	6.9833	110.608	1.14	3.46563	412.064	1.2392	1.35	28.26	0.357746	556.286	94.0209	36.5475	97.9634	38	2.00117
2021-01-31 18:30:00	348.5	16.8758	6.25	116.886	1.14	3.48813	413.442	1.2392	1.35	28.26	0.344787	558.147	92.4707	35.8307	84.3307	38	2.01324
2021-01-31 19:30:00	347.25	13.6348	6.25	114.176	1.14	3.51062	410.736	1.2392	1.35	28.26	0.26244	554.494	86.8577	33.8884	84.3101	38	2.03454
2021-01-31 20:30:00	354.562	16.2221	7.1	117.696	1.14	3.52	415.784	1.2392	1.35	28.26	0.34051	561.308	93.9081	33.8339	80.5989	38	2.00904
2021-01-31 21:30:00	348.562	8.0263	7.1	112.799	1.14	3.52	413.042	1.2392	1.35	28.26	0.126703	557.607	71.3657	33.6884	81.6981	38	2.04508
2021-01-31 22:30:00	345.312	16.2299	3.63	106.8	1.14	3.52	388.964	1.2392	1.35	28.26	0.323148	525.101	85.5631	33.691	84.1501	38	2.07177
2021-01-31 23:30:00	349.625	15.7309	4.89	111.579	1.14	3.89	412.192	1.2392	1.35	23.5076	0.362509	556.459	86.2194	33.3033	77.9358	38	2.06064
2021-02-01 00:30:00	345.25	14.2158	4.19	116.969	1.14	3.89	408.656	1.2392	1.35	23.4864	0.307155	551.686	81.0887	33.235	79.355	38	2.04976
2021-02-01 01:30:00	340.438	17.2257	4.56103	115.381	1.14	3.89	411.261	1.2392	1.35	23.4651	0.396063	555.203	87.9881	33.5945	70.4694	38	2.10367
2021-02-01 02:30:00	352.25	16.975	5.99	109.842	1.14	4.41	417.479	1.2392	1.35	23.4439	0.395627	563.596	87.4222	35.9539	82.2659	38	2.03427
2021-02-01 03:30:00	332.25	16.9296	5	117.066	1.14	4.41	415.515	1.2392	1.35	23.4226	0.358025	560.945	83.6294	36.1004	81.1168	38	2.07882
2021-02-01 04:30:00	345.375	17.5419	5	113.577	1.14	4.41	420.194	1.2392	1.35	23.4014	0.390261	567.261	85.5089	32.0544	80.9487	38	2.06137
2021-02-01 05:30:00	319.75	17.9232	3.62	110.306	1.14	4.41	419.082	1.2392	1.35	23.3801	0.343921	565.761	79.3802	35.3497	79.3418	38	2.16318
2021-02-01 06:30:00	331.125	17.6028	4.2	111.623	1.14	4.41	415.947	1.2392	1.35	23.3589	0.365294	561.528	82.2037	35.5955	76.6629	38	2.12359
2021-02-01 07:30:00	328.562	16.983	3.89	116.152	1.14	4.41	414.159	1.2392	1.35	23.35	0.342728	559.115	80.1873	34.3291	69.3988	38	2.14589
2021-02-01 08:30:00	329.75	15.1576	4.56	111.319	1.14	4.41	414.978	1.2392	1.35	23.35	0.292758	560.221	76.6194	33.2793	77.8993	38	2.13406
2021-02-01 09:30:00	332.062	15.1382	5.11	112.53	1.14	4.41	408.101	1.2392	1.35	23.35	0.311722	550.936	79.774	33.3517	80.1712	38	2.11161
2021-02-01 10:30:00	329.5	16.2634	4.78	115.201	1.14	4.41	410.253	1.2392	1.35	23.35	0.337863	553.841	81.5355	36.3352	79.6895	38	2.10069
2021-02-01 11:30:00	332.75	16.8997	4.78	110.393	1.14	4.41	418.22	1.2392	1.35	23.35	0.349283	564.597	81.8854	32.9966	77.5588	38	2.12911
2021-02-01 12:30:00	328.438	17.8879	5.6	114.978	1.14	3.67802	416.617	1.2392	1.35	19.5	0.51023	562.433	95.2488	32.8825	84.9815	38	2.09879
2021-02-01 13:30:00	330.75	16.8216	6.49	115.183	1.14	3.68677	401.491	1.2392	1.35	19.5	0.515419	542.013	97.9126	32.9451	71.0028	38	2.14095
2021-02-01 14:30:00	330.25	17.3808	5.06	116.243	1.14	3.69552	422.981	1.2392	1.35	19.5	0.476502	571.024	92.4361	32.7475	86.1701	38	2.08324
2021-02-01 15:30:00	330.688	17.0014	7.02	114.221	1.14	3.70427	428.872	1.2392	1.35	19.5	0.480194	578.977	96.4296	33.7904	83.9977	38	2.09403
2021-02-01 16:30:00	328.25	15.5702	5.9	108.882	1.14	3.71302	406.693	1.2392	1.35	19.5	0.438954	549.035	91.9507	31.6519	86.5686	38	2.12373
2021-02-01 17:30:00	341	15.9265	6.46619	116.114	1.14	3.72177	408.56	1.2392	1.35	19.5	0.486535	551.556	96.3525	35.943	84.8815	38	2.03938
2021-02-01 18:30:00	337.438	16.4896	6.39	114.669	1.14	3.73052	406.257	1.2392	1.35	19.5	0.503372	548.447	96.751	35.1786	82.3548	38	2.06898
2021-02-01 19:30:00	337.688	17.2865	6.31381	116.029	1.14	3.73927	407.256	1.2392	1.35	19.5	0.532794	549.795	97.8526	35.3306	82.1364	38	2.06288
2021-02-01 20:30:00	340.5	16.7849	7.46	108.931	1.14	3.74802	409.487	1.2392	1.35	19.5	0.524785	552.807	98.9814	34.1356	81.7402	38	2.08729
2021-02-01 21:30:00	340.375	16.8734	7.46	114.42	1.14	3.75677	406.683	1.2392	1.35	19.5	0.538427	549.022	100.367	32.898	104.567	38	1.99216
2021-02-01 22:30:00	338.625	17.884	6.1	106.011	1.14	3.76552	414.89	1.2392	1.35	19.5	0.531504	560.101	95.8571	32.4013	78.6094	38	2.12413
2021-02-01 23:30:00	335.5	16.9667	5.39	117.171	1.14	3.77427	415.904	1.2392	1.35	27.27	0.325432	561.471	87.5352	37.0148	89.6624	38	2.03405
2021-02-02 00:30:00	341.875	19.0953	6.5	114.214	1.14	3.78302	416.416	1.2392	1.35	27.27	0.397461	562.161	93.3354	36.7649	78.528	38	2.06307
2021-02-02 01:30:00	337.812	17.7659	7.22	115.794	1.14	3.79177	415.271	1.2392	1.35	27.27	0.366874	560.615	93.4554	32.7852	79.7411	38	2.08088
2021-02-02 02:30:00	337.625	17.2176	7.22	110.521	1.14	3.80052	410.529	1.2392	1.35	27.27	0.354918	554.214	92.2749	33.9464	88.6676	38	2.06708
2021-02-02 03:30:00	342.688	16.4138	5.15	115.372	1.14	3.80927	409.877	1.2392	1.35	25.11	0.355864	553.333	87.9044	33.0742	82.7346	38	2.05381
2021-02-02 04:30:00	340.25	17.773	7.13	107.627	1.14	3.81	409.777	1.2392	1.35	25.11	0.408583	553.198	93.8533	37.0481	86.4444	38	2.06636
2021-02-02 05:30:00	337.375	16.3301	5.9	108.466	1.14	3.81	409.677	1.2392	1.35	25.11	0.350735	553.063	88.4094	37.0845	86.7957	38	2.07177
2021-02-02 06:30:00	340.375	16.1227	5.9	112.022	1.14	3.81	408.368	1.2392	1.35	25.11	0.352627	551.297	88.9516	32.7397	83.1662	38	2.07503
2021-02-02 07:30:00	335.875	15.4351	6.5	113.343	1.14	3.81	408.25	1.2392	1.35	25.11	0.33429	551.138	89.2365	36.3304	86.7814	38	2.06017
2021-02-02 08:30:00	342.312	17.6035	7.14	107.986	1.14	3.81	409.959	1.2392	1.35	25.11	0.406863	553.444	93.831	37.2482	87.5436	38	2.05315
2021-02-02 09:30:00	320.25	17.014	5.07783	120.069	1.14	3.81	415.499	1.2392	1.35	25.11	0.335351	560.923	86.6871	32.5154	86.3163	38	2.10395
2021-02-02 10:30:00	341	16.9625	5.15427	109.246	1.14	3.81	415.513	1.2392	1.35	25.11	0.358965	560.942	87.4124	36.7064	83.9685	38	2.06714
2021-02-02 11:30:00	339.062	13.652	5.2307	113.59	1.14	3.81	410.462	1.2392	1.35	25.11	0.270699	554.124	81.3698	36.0879	80.6008	38	2.07057
2021-02-02 12:30:00	341.188	17.4837	4.34	106.039	1.14	3.79275	409.819	1.2392	1.35	28.87	0.316524	553.256	84.7526	35.6379	86.9085	38	2.07279
2021-02-02 13:30:00	363.375	16.7949	4.78	104.523	1.14	3.77392	409.177	1.2392	1.35	28.87	0.330939	552.389	86.4784	34.5834	78.4367	38	2.03473
2021-02-02 14:30:00	359.062	16.4447	5.14	107.166	1.14	3.7551	399.689	1.2392	1.35	28.87	0.332543	539.58	87.7312	36.2712	74.9891	38	2.04524
2021-02-02 15:30:00	358.438	17.7616	5.14	106.519	1.14	3.73627	395.596	1.2392	1.35	28.87	0.372142	534.055	90.1254	36.3417	91.0889	38	1.99537
2021-02-02 16:30:00	365.75	16.3305	5.77	107.454	1.14	4.05	406.401	1.2392	1.35	25.33	0.381812	548.641	88.8361	33.0317	88.8935	38	1.98598
2021-02-02 17:30:00	362.062	16.5242	6.09	111.382	1.14	4.05	405.666	1.2392	1.35	25.33	0.389404	547.649	90.2887	32.9783	75.4239	38	2.0283
2021-02-02 18:30:00	335.938	16.6292	6.54	110.818	1.14	4.05	401.448	1.2392	1.35	25.33	0.36571	541.955	89.8681	34.3287	79.9105	38	2.10194
2021-02-02 19:30:00	361.125	15.7188	5.46	112.851	1.14	4.05	404.628	1.2392	1.35	25.33	0.358442	546.247	87.3708	36.1828	81.9088	38	1.99351
2021-02-02 20:30:00	365.375	15.317	5.44	106.905	1.14	4.05	407.371	1.2392	1.35	25.33	0.34454	549.95	85.7603	35.6133	79.4253	38	2.01198
2021-02-02 21:30:00	365.125	16.2719	4.28	123.264	1.14	4.05	409.322	1.2392	1.35	25.33	0.36608	552.585	86.2443	35.8525	84.7103	38	1.93512
2021-02-02 22:30:00	356.5	15.5645	5.68	103.746	1.14	3.91857	409.367	1.2392	1.35	21.4566	0.418368	552.646	89.4067	35.6858	0.303656	38	2.37252
2021-02-02 23:30:00	365.875	16.2611	6.52	108.294	1.14	3.80219	396.96	1.2392	1.35	21.4428	0.498954	535.895	96.3696	34.6851	89.2638	38	1.97592
2021-02-03 00:30:00	366.688	16.2329	5.08	110.401	1.14	3.77844	405.967	1.2392	1.35	21.4291	0.467355	548.055	92.2108	35.4723	90.2713	38	1.95991
2021-02-03 01:30:00	360.562	15.8275	7.1	102.807	1.14	3.75469	410.901	1.2392	1.35	21.4153	0.454865	554.716	94.6857	35.1642	89.4636	38	2.01163
2021-02-03 02:30:00	360.125	14.6901	4.93	99.7733	1.14	3.73094	406.513	1.2392	1.35	21.4016	0.392214	548.793	87.0762	35.7087	97.783	38	1.99518
2021-02-03 03:30:00	363	14.2348	6.07122	104.802	1.14	3.70719	399.054	1.2392	1.35	21.3878	0.408972	538.723	91.1943	32.143	96.6137	38	1.98254
2021-02-03 04:30:00	356.812	16.5609	6.07785	116.111	1.14	3.68344	409.823	1.2392	1.35	21.3741	0.477723	553.261	95.6026	35.3345	87.8232	38	1.97896
2021-02-03 05:30:00	355.25	16.1248	6.08448	117.438	1.14	3.65969	428.493	1.2392	1.35	21.3603	0.432252	578.466	93.2382	32.1366	89.182	38	1.98508
2021-02-03 06:30:00	360.688	16.3774	5.28	119.163	1.14	3.63594	410.865	1.2392	1.35	21.35	0.468952	554.668	94.012	36.2603	87.7802	38	1.95269
2021-02-03 07:30:00	362.562	16.685	5.28	116.626	1.14	3.63	408.932	1.2392	1.35	21.35	0.485294	552.058	94.5538	31.8855	80.5592	38	1.9932
2021-02-03 08:30:00	359.125	16.388	5.42694	118.016	1.14	3.63	408.975	1.2392	1.35	21.35	0.471331	552.117	94.4027	31.9406	81.6719	38	1.99545
2021-02-03 09:30:00	362.188	16.2747	5.4193	121.861	1.14	3.63	401.018	1.2392	1.35	21.35	0.488072	541.374	95.7048	35.9756	67.9738	38	2.00277
2021-02-03 10:30:00	362.438	15.5868	5.41166	112.603	1.14	3.63	402.309	1.2392	1.35	21.35	0.454321	543.118	93.2534	35.3464	67.3439	38	2.04178
2021-02-03 11:30:00	360.75	15.9756	6.06	109.561	1.14	3.63	403.601	1.2392	1.35	21.35	0.47046	544.861	94.9602	35.6632	76.2662	38	2.02783
2021-02-03 12:30:00	356.625	14.4865	5.44	119.083	1.14	3.99833	418.94	1.2392	1.35	29.13	0.256331	565.569	81.7434	34.7793	69.6554	38	2.03043
2021-02-03 13:30:00	357.688	15.844	6.21	115.113	1.14	4.02333	421.304	1.2392	1.35	29.13	0.29369	568.76	85.8603	33.9887	78.2499	38	2.01577
2021-02-03 14:30:00	337.562	16.0923	5.88	113.442	1.14	4.04833	418.98	1.2392	1.35	29.13	0.275098	565.623	83.4417	33.4888	72.5163	38	2.11522
2021-02-03 15:30:00	344.5	16.5666	4.53	111.447	1.14	4.07333	415.868	1.2392	1.35	29.13	0.284053	561.422	81.3966	33.2715	89.1086	38	2.04029
2021-02-03 16:30:00	330.875	15.368	5.7	117.991	1.14	4.09833	412.756	1.2392	1.35	30.99	0.238106	557.221	80.8607	33.171	89.7616	38	2.05976
2021-02-03 17:30:00	328.062	16.8596	3.24	114.601	1.14	4.12333	418.494	1.2392	1.35	30.99	0.238804	564.967	75.593	32.8645	89.2716	38	2.08626
2021-02-03 18:30:00	326.562	16.3247	4.82	119.182	1.14	4.14833	411.832	1.2392	1.35	30.99	0.246565	555.973	79.6885	33.3296	77.1415	38	2.11518
2021-02-03 19:30:00	327.312	15.7591	4.06	117.174	1.14	4.17333	405.796	1.2392	1.35	30.99	0.232405	547.824	76.4918	35.9315	70.3687	38	2.13648
2021-02-03 20:30:00	326.625	16.5317	5.67	121.565	1.14	4.19	408.11	1.2392	1.35	30.99	0.262571	550.948	83.0256	33.5326	81.1487	38	2.08969
2021-02-03 21:30:00	321.125	16.7271	5.67	132.659	1.14	4.19	410.424	1.2392	1.35	30.99	0.263141	554.072	84.1165	36.7979	73.0618	38	2.08134
2021-02-03 22:30:00	363.75	16.1262	2.39	130.741	1.14	4.19	402.787	1.2392	1.35	30.99	0.270624	543.763	77.7431	36.7498	68.7798	38	1.9598
2021-02-03 23:30:00	349.875	16.2811	3.97	124.287	1.14	3.84	407.662	1.2392	1.35	28.85	0.301186	550.343	83.949	35.6019	79.2941	38	1.99814
2021-02-04 00:30:00	355.812	17.003	5.55	126.003	1.14	3.84	400.057	1.2392	1.35	28.85	0.353378	540.078	91.0112	35.9172	77.3587	38	1.97769
2021-02-04 01:30:00	360.375	16.7653	5.2	131.727	1.14	3.84	409.837	1.2392	1.35	28.85	0.339517	553.28	89.6988	35.8442	71.6136	38	1.96082
2021-02-04 02:30:00	370.312	15.8894	4.85	130.649	1.14	3.84	412.94	1.2392	1.35	28.85	0.3203	557.469	87.5483	35.0457	71.2071	38	1.9373
2021-02-04 03:30:00	360.375	15.6748	5.24042	141.437	1.14	3.84	415.475	1.2392	1.35	28.85	0.309379	560.892	88.6255	35.3037	74.1932	38	1.92009
2021-02-04 04:30:00	361.625	16.0529	5.14966	137.005	1.14	3.76	400.147	1.2392	1.35	30.09	0.321884	540.198	90.1286	34.1929	79.5719	38	1.91868
2021-02-04 05:30:00	370.812	16.4062	6.57	135.952	1.14	3.64	407.691	1.2392	1.35	30.09	0.350227	550.383	95.34	33.6713	87.1367	38	1.87408
2021-02-04 06:30:00	371.062	15.6475	4.95	137.433	1.14	3.63	409.958	1.2392	1.35	30.09	0.312258	553.443	89.5605	34.0422	82.2004	38	1.88172
2021-02-04 07:30:00	365.562	16.7324	5.97	132.263	1.14	3.63	407.716	1.2392	1.35	30.09	0.344609	550.417	93.3082	33.0133	86.3642	38	1.90617
2021-02-04 08:30:00	379	15.4935	4.99	142.976	1.14	3.63	408.928	1.2392	1.35	30.09	0.320485	552.053	90.6611	36.9938	83.1001	38	1.83026
2021-02-04 09:30:00	369.75	15.3807	5.63	139.717	1.14	3.63	404.237	1.2392	1.35	30.09	0.318758	545.72	92.0383	36.2588	80.2838	38	1.87708
2021-02-04 10:30:00	347.688	14.8354	5.63	117.035	1.14	3.63	402.569	1.2392	1.35	30.09	0.273742	543.468	86.7858	36.0253	83.4946	38	2.01754
2021-02-04 11:30:00	341.062	15.3571	4.74	123.104	1.14	3.63	410.081	1.2392	1.35	30.09	0.265785	553.61	84.5301	33.4489	85.983	38	2.01685
2021-02-04 12:30:00	341.938	15.3615	5.14	119.713	1.14	4.12	409.979	1.2392	1.35	18.69	0.455583	553.471	89.7202	38.4502	99.8768	38	1.96484
2021-02-04 13:30:00	334.812	17.4509	4.62	123.979	1.14	4.12	409.876	1.2392	1.35	18.69	0.522946	553.332	92.562	37.6994	87.9935	38	2.01347
2021-02-04 14:30:00	343.312	15.3004	5.1	118.796	1.14	4.12	408.206	1.2392	1.35	18.69	0.45746	551.078	89.6983	32.0443	85.2668	38	2.03303
2021-02-04 15:30:00	339.5	15.3666	4.83	113.075	1.14	4.12	410.462	1.2392	1.35	18.69	0.440521	554.124	87.4511	34.8454	76.2787	38	2.09099
2021-02-04 16:30:00	338.812	16.5039	5.63918	116.656	1.14	4.12	399.564	1.2392	1.35	18.69	0.524134	539.412	94.4988	35.9025	81.7372	38	2.05583
2021-02-04 17:30:00	340.062	15.7129	5.68027	119.177	1.14	4.12	407.301	1.2392	1.35	18.69	0.480526	549.856	92.4188	36.1821	79.4119	38	2.04861
2021-02-04 18:30:00	340.375	17.137	5.36	113.812	1.14	4.12	409.561	1.2392	1.35	18.69	0.527623	552.908	93.4746	36.0763	85.9379	38	2.04648
2021-02-04 19:30:00	352.312	15.9766	6.15	122.262	1.14	4.12	396.749	1.2392	1.35	18.69	0.548345	535.611	97.5217	32.4092	95.1746	38	1.95679
2021-02-04 20:30:00	349.188	14.7635	4.42	122.228	1.14	4.12	413.332	1.2392	1.35	18.69	0.427078	557.998	86.3975	35.1272	79.9642	38	2.00754
2021-02-04 21:30:00	349.125	15.5329	4.42	119.907	1.14	4.12	406.417	1.2392	1.35	18.69	0.47118	548.663	89.0981	35.6862	87.2957	38	1.99045
2021-02-04 22:30:00	349.75	15.7648	5.63	117.55	1.14	4.12	413.503	1.2392	1.35	18.69	0.487901	558.229	92.3225	37.6191	92.624	38	1.9736
2021-02-04 23:30:00	336.625	16.2052	6.17	123.006	1.14	3.5725	423.672	1.2392	1.35	29.54	0.287967	571.957	89.1897	32.5414	94.268	38	2.0074
2021-02-05 00:30:00	341.938	15.6812	6.83	121.359	1.14	3.57625	432.142	1.2392	1.35	29.54	0.27864	583.392	89.5545	32.0404	86.0592	38	2.0251
2021-02-05 01:30:00	341.375	15.1447	4.97	115.367	1.14	3.58	428.659	1.2392	1.35	29.54	0.249751	578.69	82.5793	31.109	89.4164	38	2.04205
2021-02-05 02:30:00	338.75	16.358	6.23	111.129	1.14	3.58375	421.542	1.2392	1.35	31.32	0.27186	569.082	87.4444	36.1244	82.7224	38	2.07397
2021-02-05 03:30:00	340.188	16.0759	4.61	98.6566	1.14	3.5875	417.527	1.2392	1.35	31.32	0.253661	563.662	81.8842	33.4614	91.7602	38	2.09697
2021-02-05 04:30:00	352.5	15.7689	5.85	99.0092	1.14	3.59125	422.982	1.2392	1.35	31.32	0.263242	571.026	84.6979	34.7713	91.333	38	2.04876
2021-02-05 05:30:00	351.25	16.7217	5.04	100.095	1.14	3.595	419.528	1.2392	1.35	31.32	0.28101	566.363	84.8674	31.9703	83.0487	38	2.08794
2021-02-05 06:30:00	352	14.7823	5.58	102.587	1.14	3.59875	424.122	1.2392	1.35	31.32	0.239124	572.565	82.411	35.6364	82.0677	38	2.0656
2021-02-05 07:30:00	348	15.823	4.64	101.381	1.14	3.61167	409.701	1.2392	1.35	31.32	0.263946	553.096	83.0366	32.5756	91.1238	38	2.06341
2021-02-05 08:30:00	350	15.8226	4.64	102.732	1.14	3.62917	416.75	1.2392	1.35	31.32	0.259288	562.613	82.5026	34.3949	90.7366	38	2.04609
2021-02-05 09:30:00	350.938	15.9269	4.83575	113.703	1.14	3.64667	408.195	1.2392	1.35	31.32	0.275848	551.064	85.179	36.893	83.052	38	2.01795
2021-02-05 10:30:00	351.312	15.576	4.77467	122.148	1.14	3.66417	408.39	1.2392	1.35	31.32	0.269997	551.326	85.2002	33.4176	79.9774	38	2.00642
2021-02-05 11:30:00	349.5	15.5934	4.71359	123.061	1.14	3.68167	412.327	1.2392	1.35	31.32	0.264015	556.641	84.4577	34.7281	79.1356	38	2.00743
2021-02-05 12:30:00	342.062	15.1792	6.01246	119.02	1.14	3.69917	424.063	1.2392	1.35	23.05	0.351172	572.485	89.2484	31.9874	72.7184	38	2.0805
2021-02-05 13:30:00	348.188	15.4401	5.9489	120.71	1.14	3.71667	410.724	1.2392	1.35	23.05	0.385625	554.478	91.6763	33.5344	82.3686	38	2.01394
2021-02-05 14:30:00	350.75	15.8499	5.88534	113.637	1.14	3.73417	408.658	1.2392	1.35	23.05	0.399921	551.688	91.4775	36.2559	87.7215	38	2.00537
2021-02-05 15:30:00	350.25	16.299	5.82178	120.158	1.14	3.73833	421.057	1.2392	1.35	23.05	0.399117	568.427	91.6025	36.1896	82.6415	38	1.99945
2021-02-05 16:30:00	348.5	15.3237	6.23	118.155	1.14	3.73583	413.131	1.2392	1.35	19.22	0.474285	557.727	95.2024	32.5305	87.3413	38	2.00937
2021-02-05 17:30:00	351.062	17.1506	6.1145	118.217	1.14	3.73333	408.76	1.2392	1.35	19.22	0.559893	551.826	98.6272	39.6	89.7927	38	1.96968
2021-02-05 18:30:00	346	17.38	5.29	115.802	1.14	3.73083	406.047	1.2392	1.35	19.22	0.549635	548.164	96.2969	40.6856	94.4296	38	1.9764
2021-02-05 19:30:00	344	16.4973	5.64895	123.772	1.14	3.72833	399.722	1.2392	1.35	19.22	0.533541	539.625	97.5083	35.6579	82.2284	38	2.00965
2021-02-05 20:30:00	351.562	16.8449	5.64411	114.681	1.14	3.72583	404.259	1.2392	1.35	19.22	0.547136	545.75	96.9106	35.2618	88.7936	38	1.99849
2021-02-05 21:30:00	348.562	16.8883	8.68	114.478	1.14	3.72333	416.082	1.2392	1.35	19.22	0.566131	561.711	103.829	37.0983	87.5424	38	2.00725
2021-02-05 22:30:00	350.562	15.5644	8.68	121.76	1.14	3.72083	410.58	1.2392	1.35	19.22	0.535302	554.283	104.517	35.0796	79.5956	38	2.00613
2021-02-05 23:30:00	343.875	15.8272	5.48	117.973	1.14	3.72	416.377	1.2392	1.35	29.68	0.280183	562.11	85.8859	36.8803	87.2586	38	2.01126
2021-02-06 00:30:00	350.438	14.2314	5.10726	115.292	1.14	3.72	412.648	1.2392	1.35	29.68	0.247977	557.075	82.2111	35.2357	84.0322	38	2.01583
2021-02-06 01:30:00	350.375	15.6664	5.0223	115.313	1.14	3.72	414.987	1.2392	1.35	29.68	0.279522	560.232	84.6731	36.2212	72.0859	38	2.0534
2021-02-06 02:30:00	343.812	17.345	5.32638	116.869	1.14	4.21	405.618	1.2392	1.35	28.12	0.3336	547.584	86.1383	33.4524	78.0656	38	2.0589
2021-02-06 03:30:00	349.125	16.2863	5.31086	121.923	1.14	4.21	410.288	1.2392	1.35	28.12	0.309002	553.888	84.6438	36.3504	88.3365	38	1.97745
2021-02-06 04:30:00	350.625	14.5743	4.6	114.372	1.14	4.21	409.664	1.2392	1.35	28.12	0.255726	553.046	77.8255	33.9408	77.6378	38	2.04491
2021-02-06 05:30:00	351.688	14.8475	4.6	116.315	1.14	4.21	413.968	1.2392	1.35	28.12	0.260349	558.856	78.354	36.2988	78.8734	38	2.02147
2021-02-06 06:30:00	346	17.3968	4.6	119.832	1.14	4.21	406.615	1.2392	1.35	28.12	0.330417	548.93	84.7323	35.9179	84.3206	38	2.01011
2021-02-06 07:30:00	352.188	13.199	4.6	120.213	1.14	4.21	405.76	1.2392	1.35	28.12	0.226977	547.775	75.2115	32.606	85.5756	38	1.99501
2021-02-06 08:30:00	348.812	16.1391	4.6	118.699	1.14	4.21	414.668	1.2392	1.35	28.12	0.291017	559.802	81.3759	37.0304	88.5044	38	1.98764
2021-02-06 09:30:00	351.312	15.6753	4.6	115.676	1.14	4.21	415.407	1.2392	1.35	28.12	0.279861	560.799	80.1411	35.1078	83.7435	38	2.01283
2021-02-06 10:30:00	348.312	16.1962	4.6	125.281	1.14	4.21	422.681	1.2392	1.35	28.12	0.285558	570.62	81.222	34.0206	81.1517	38	1.99865
2021-02-06 11:30:00	355.188	15.6515	4.6	124.337	1.14	4.21	411.934	1.2392	1.35	28.12	0.291053	556.111	81.8719	33.9675	88.2248	38	1.95727
2021-02-06 12:30:00	344.188	16.3329	4.6	116.512	1.14	4.03	412.637	1.2392	1.35	29.1483	0.284984	557.06	82.3148	36.8414	82.9147	38	2.03059
2021-02-06 13:30:00	338.875	15.7926	4.6	116.141	1.14	3.97021	409.135	1.2392	1.35	29.1458	0.270966	552.333	81.508	35.785	82.1104	38	2.05677
2021-02-06 14:30:00	339.5	15.4131	4.6	125.519	1.14	3.94646	413.258	1.2392	1.35	29.1433	0.262443	557.899	81.5455	36.8242	78.9177	38	2.02528
2021-02-06 15:30:00	336	15.7297	4.6	117.93	1.14	3.92271	416.185	1.2392	1.35	29.1408	0.261112	561.849	80.8888	36.9189	84.4562	38	2.04758
2021-02-06 16:30:00	334.438	17.7187	4.6	115.261	1.14	3.89896	417.706	1.2392	1.35	29.1383	0.304343	563.903	84.3892	36.5987	83.0264	38	2.06981
2021-02-06 17:30:00	332.875	16.5922	4.6	123.388	1.14	3.87521	421.664	1.2392	1.35	29.1358	0.275685	569.247	82.786	33.198	79.6555	38	2.06652
2021-02-06 18:30:00	338.312	16.5105	4.6	117.653	1.14	3.85146	418.309	1.2392	1.35	29.1333	0.282109	564.717	83.0921	36.1778	86.1023	38	2.03759
2021-02-06 19:30:00	336.875	14.3504	4.6	121.512	1.14	3.82771	415.465	1.2392	1.35	29.1308	0.234261	560.878	79.1751	35.5985	75.4333	38	2.06638
2021-02-06 20:30:00	352.5	17.2279	4.6	121.554	1.14	3.80396	395.287	1.2392	1.35	29.13	0.346308	533.637	88.6458	36.1353	82.1242	38	1.98872
2021-02-06 21:30:00	349.062	17.9634	4.6	116.562	1.14	3.8	419.359	1.2392	1.35	29.13	0.329862	566.135	86.7563	32.0289	79.1891	38	2.04294
2021-02-06 22:30:00	350.125	15.8949	4.6	122.942	1.14	3.8	415.26	1.2392	1.35	29.13	0.287298	560.601	84.3034	35.6333	85.6394	38	1.9815
2021-02-06 23:30:00	348.688	13.8147	4.6	113.672	1.14	3.41	396.391	1.2392	1.35	27.2	0.281864	535.128	85.1702	35.6343	85.307	38	2.0223
2021-02-07 00:30:00	339.625	15.6372	5.61129	111.401	1.14	3.41	411.798	1.2392	1.35	27.2	0.312101	555.927	88.8634	36.0721	89.5185	38	2.04621
2021-02-07 01:30:00	338.938	15.8905	5.61482	115.994	1.14	3.41	409.12	1.2392	1.35	27.2	0.323069	552.312	90.1139	34.8022	86.8194	38	2.04421
2021-02-07 02:30:00	342.188	15.073	5.61835	115.133	1.14	3.41	405.358	1.2392	1.35	27.2	0.309489	547.234	89.3148	36.997	84.0061	38	2.03853
2021-02-07 03:30:00	348.438	16.6921	6.01	108.392	1.14	3.14	411.778	1.2392	1.35	23.49	0.42548	555.9	95.5262	0.867787	0.355682	38	2.56069
2021-02-07 04:30:00	351.625	16.3316	7.00496	111.234	1.14	3.14	411.939	1.2392	1.35	23.49	0.431623	556.118	98.185	33.1448	80.129	38	2.04796
2021-02-07 05:30:00	349.25	15.5713	7.06908	126.122	1.14	3.14	391.892	1.2392	1.35	23.49	0.445228	529.054	101.743	32.4167	85.9299	38	1.98207
2021-02-07 06:30:00	340.25	15.656	4.6	126.871	1.14	3.14	414.878	1.2392	1.35	23.49	0.371442	560.085	91.738	36.4742	81.4993	38	2.01008
2021-02-07 07:30:00	346.125	15.6203	4.76429	131.441	1.14	3.14	408.188	1.2392	1.35	23.49	0.391491	551.054	93.7296	33.2428	85.3999	38	1.97164
2021-02-07 08:30:00	350	15.9241	6.32	128.416	1.14	3.14	418.861	1.2392	1.35	23.49	0.410448	565.463	97.8187	32.6932	96.2976	38	1.93767
2021-02-07 09:30:00	320.688	16.6459	5.57	128.234	1.14	3.14	405.624	1.2392	1.35	23.49	0.397806	547.593	95.8567	32.8035	94.3474	38	2.03996
2021-02-07 10:30:00	349.438	17.6355	5.57	128.782	1.14	3.14	411.694	1.2392	1.35	23.49	0.46286	555.786	98.0582	33.0289	93.5612	38	1.94559
2021-02-07 11:30:00	350.375	15.3514	6.45	126.386	1.14	3.14	420.317	1.2392	1.35	23.49	0.391989	567.427	97.1371	32.7719	83.8256	38	1.98312
2021-02-07 12:30:00	338.312	16.2181	5.4	132.015	1.14	4.74	426.179	1.2392	1.35	23.14	0.337452	575.341	81.8808	35.8759	88.1306	38	1.97741
2021-02-07 13:30:00	343.125	15.6741	5.4	135.991	1.14	4.74	416.123	1.2392	1.35	23.14	0.343691	561.767	83.0716	31.6758	82.8652	38	1.9778
2021-02-07 14:30:00	339.938	16.1146	4.82	131.426	1.14	4.74	423.756	1.2392	1.35	23.14	0.331415	572.07	80.0878	31.7461	82.6047	38	2.0059
2021-02-07 15:30:00	327.562	17.642	5.62	122.517	1.14	4.74	415.894	1.2392	1.35	23.14	0.377752	561.458	84.9269	33.8352	86.8342	38	2.06121
2021-02-07 16:30:00	337.438	16.3345	5.92517	131.114	1.14	3.7	424.823	1.2392	1.35	26.11	0.332663	573.511	90.3762	33.2988	79.5706	38	2.0204
2021-02-07 17:30:00	335.75	16.7724	5.97631	137.583	1.14	3.7	423.549	1.2392	1.35	26.11	0.34752	571.791	92.1324	33.2537	83.5055	38	1.98865
2021-02-07 18:30:00	320.062	16.9803	6.02744	134.434	1.14	3.7	426.385	1.2392	1.35	26.11	0.327816	575.62	90.655	33.6417	80.0083	38	2.06449
2021-02-07 19:30:00	330.375	16.9536	4.8	121.576	1.14	3.7	404.369	1.2392	1.35	26.11	0.347117	545.898	88.3336	36.9484	79.6575	38	2.06939
2021-02-07 20:30:00	331.375	13.6974	6.27204	126.856	1.14	3.7	410.157	1.2392	1.35	26.11	0.273782	553.712	87.2044	32.6368	90.3502	38	2.02309
2021-02-07 21:30:00	331.5	16.6348	6.30343	126.804	1.14	3.7	410.941	1.2392	1.35	26.11	0.351742	554.77	92.3937	36.6353	92.2141	38	2.00327
2021-02-07 22:30:00	339.875	14.4241	6.33483	134.84	1.14	3.7	409.021	1.2392	1.35	26.11	0.309763	552.178	91.0978	36.2884	77.947	38	1.99364
2021-02-07 23:30:00	338.625	16.4224	8.52	131.607	1.14	3.42	399.878	1.2392	1.35	26.75	0.396452	539.836	102.949	32.301	81.3173	38	2.01202
2021-02-08 00:30:00	333.562	16.4554	5.83	132.105	1.14	3.42	403.829	1.2392	1.35	26.75	0.353998	545.169	94.0523	35.8865	94.0891	38	1.97316
2021-02-08 01:30:00	338.312	16.9975	5.57	133.148	1.14	3.42	410.773	1.2392	1.35	26.75	0.363238	554.543	93.7017	32.7849	84.1443	38	1.99626
2021-02-08 02:30:00	336.812	16.4368	5.34327	125.62	1.14	3.42	411.127	1.2392	1.35	26.75	0.340046	555.021	91.194	36.3376	93.3249	38	1.98758
2021-02-08 03:30:00	340	16.7226	5.34858	122.971	1.14	3.15	410.288	1.2392	1.35	27.4	0.349226	553.889	93.2174	36.5977	85.6292	38	2.01156
2021-02-08 04:30:00	338.938	15.4204	5.81	138.421	1.14	3.15	414.626	1.2392	1.35	27.4	0.322694	559.745	94.6925	32.015	97.7525	38	1.9342
2021-02-08 05:30:00	329.438	15.1107	6.38	137.442	1.14	3.15	408.871	1.2392	1.35	27.4	0.316684	551.976	96.2143	34.9978	98.0762	38	1.95704
2021-02-08 06:30:00	336.562	15.1324	6.06141	126.009	1.14	3.15	409.466	1.2392	1.35	27.4	0.314994	552.779	93.6767	37.6837	92.1641	38	1.98634
2021-02-08 07:30:00	340.625	15.6575	5.99198	129.104	1.14	3.15	410.061	1.2392	1.35	27.4	0.333086	553.582	94.7301	33.1277	94.2525	38	1.9698
2021-02-08 08:30:00	327.812	14.8976	6.52	133.329	1.14	3.15	406.793	1.2392	1.35	27.4	0.311227	549.171	95.8946	36.3574	92.1379	38	1.99208
2021-02-08 09:30:00	331.75	16.5101	7.09326	128.953	1.14	3.15	420.942	1.2392	1.35	27.4	0.343231	568.272	97.5737	31.9034	94.3093	38	2.00306
2021-02-08 10:30:00	283.375	16.2771	7.115	133.343	1.14	3.15	411.633	1.2392	1.35	27.4	0.292644	555.704	96.6039	78.6007	31.9739	38	2.21955
2021-02-08 11:30:00	352.312	16.0947	7.13674	124.644	1.14	3.15	413.445	1.2392	1.35	27.4	0.36396	558.151	98.1628	81.1319	78.8783	38	1.85171
2021-02-08 12:30:00	349.188	16.1927	6.9	129.088	1.14	3.92	415.258	1.2392	1.35	24.62	0.385385	560.598	94.0711	80.7825	0.257235	38	2.09875
2021-02-08 13:30:00	317	17.2867	6.24	122.185	1.14	3.92	406.997	1.2392	1.35	24.62	0.368859	549.446	91.0546	0.776166	0.255232	38	2.64975
2021-02-08 14:30:00	297.062	16.9788	5.97582	111.471	1.14	3.92	415.945	1.2392	1.35	24.62	0.309886	561.526	84.9383	0.972526	0.253228	38	2.84882
2021-02-08 15:30:00	285.688	17.8274	6.04023	121.044	1.14	3.92	406.716	1.2392	1.35	24.62	0.332071	549.067	88.1383	0.843735	0.251225	38	2.8528
2021-02-08 16:30:00	392.125	16.5037	6.10463	120.471	1.14	3.32	405.609	1.2392	1.35	25.26	0.45714	547.572	97.7054	0.909155	0.249221	38	2.28372
2021-02-08 17:30:00	380.25	17.609	6.47822	109.91	1.14	3.32	410.345	1.2392	1.35	25.26	0.466377	553.966	97.4653	0.823247	0.247217	38	2.39192
2021-02-08 18:30:00	337.562	16.7137	6.45356	115.878	1.14	3.32	410.476	1.2392	1.35	25.26	0.382854	554.142	94.9862	0.89851	0.245214	38	2.57386
2021-02-08 19:30:00	332.438	17.2726	6.4289	121.257	1.14	3.32	407.706	1.2392	1.35	25.26	0.397768	550.404	96.3115	0.872259	0.24321	38	2.56852
2021-02-08 20:30:00	343.625	16.7637	6.40425	115.559	1.14	3.32	393.082	1.2392	1.35	25.26	0.415911	530.66	96.7821	0.861763	0.246781	38	2.54326
2021-02-08 21:30:00	323.938	16.6188	6.225	115.154	1.14	3.32	410.447	1.2392	1.35	25.26	0.358725	554.103	93.2662	0.935062	0.257784	38	2.65507
2021-02-08 22:30:00	321.875	17.2255	6.07	112.884	1.14	3.32	408.708	1.2392	1.35	25.26	0.371216	551.756	93.3142	0.84259	0.268788	38	2.68289
2021-02-08 23:30:00	302	16.9281	4.49	120.678	1.14	3.59	410.67	1.2392	1.35	28.27	0.273314	554.404	83.7914	0.962599	0.279791	38	2.74898
2021-02-09 00:30:00	313.625	15.8217	5.28	119.65	1.14	3.59	413.349	1.2392	1.35	28.27	0.267135	558.021	84.9267	0.862853	0.290794	38	2.68583
2021-02-09 01:30:00	317.688	15.5663	4.43	147.852	1.14	3.59	420.088	1.2392	1.35	28.27	0.261204	567.119	84.6827	0.78906	0.301797	38	2.48659
2021-02-09 02:30:00	356.125	17.6105	4.43	140.622	1.14	3.59	420.241	1.2392	1.35	28.27	0.353174	567.326	90.3178	0.846173	0.3128	38	2.3412
2021-02-09 03:30:00	339.812	16.1438	5.26305	149.952	1.14	3.32	426.987	1.2392	1.35	32.1	0.269553	576.432	90.9184	0.827133	0.323803	38	2.3672
2021-02-09 04:30:00	322.625	15.7879	5.26814	138.992	1.14	3.32	419.145	1.2392	1.35	32.1	0.248675	565.846	88.6777	0.952901	0.327289	38	2.51223
2021-02-09 05:30:00	329.5	17.6695	6.77	126.678	1.14	3.32	416.857	1.2392	1.35	32.1	0.304481	562.757	94.4728	0.995062	0.325288	38	2.54989
2021-02-09 06:30:00	331.875	16.6579	5.84	120.526	1.14	3.32	409.147	1.2392	1.35	32.1	0.282887	552.349	90.7273	0.808132	0.323287	38	2.57605
2021-02-09 07:30:00	328	16.4593	4.23	128.087	1.14	3.32	407.921	1.2392	1.35	32.1	0.264245	550.693	86.524	0.820699	0.321285	38	2.55027
2021-02-09 08:30:00	322.375	16.8867	4.96769	131.873	1.14	3.32	411.926	1.2392	1.35	32.1	0.271449	556.1	89.0102	0.90934	0.319284	38	2.55685
2021-02-09 09:30:00	320.188	16.334	5.04322	121.415	1.14	3.32	414.191	1.2392	1.35	32.1	0.253011	559.157	86.8323	0.90869	0.317283	38	2.63532
2021-02-09 10:30:00	323.125	15.942	5.11874	128.761	1.14	3.32	402.442	1.2392	1.35	32.1	0.262142	543.297	88.7495	0.846052	0.315282	38	2.5724
2021-02-09 11:30:00	329.188	17.4478	7.06	113.515	1.14	3.32	402.924	1.2392	1.35	32.1	0.309892	543.947	94.2083	0.931922	0.313281	38	2.63524
2021-02-09 12:30:00	327.688	17.6948	6.72	112.812	1.14	3.84125	413.809	1.2392	1.35	30.03	0.308727	558.642	89.3217	0.707962	0.309816	38	2.64982
2021-02-09 13:30:00	329.188	17.3031	6.72	114.115	1.14	3.81625	412.271	1.2392	1.35	30.03	0.304748	556.566	89.4223	0.738751	0.305813	38	2.63248
2021-02-09 14:30:00	330.688	16.8355	6.46	134.549	1.14	3.79125	423.529	1.2392	1.35	30.03	0.29265	571.764	90.2565	0.677203	0.301811	38	2.49827
2021-02-09 15:30:00	345.062	17.4213	5.69	128.943	1.14	3.76625	419.403	1.2392	1.35	30.03	0.317101	566.194	89.6892	0.431812	0.297808	38	2.45905
2021-02-09 16:30:00	350	16.5998	7.64	126.695	1.14	3.74125	423.21	1.2392	1.35	31.22	0.304206	571.334	93.3942	0.74445	0.293805	38	2.44573
2021-02-09 17:30:00	348.25	18.8272	6.56	127.189	1.14	3.71625	411.148	1.2392	1.35	31.22	0.356678	555.05	94.2681	0.801411	0.289803	38	2.45135
2021-02-09 18:30:00	351.125	16.3793	6.2	129.892	1.14	3.69125	408.755	1.2392	1.35	31.22	0.304943	551.819	91.3463	0.730767	0.2858	38	2.42252
2021-02-09 19:30:00	344.938	15.5857	5.62	131.415	1.14	3.66625	404.498	1.2392	1.35	31.22	0.280201	546.073	88.8558	0.927828	0.281798	38	2.44332
2021-02-09 20:30:00	344.562	16.5436	6.10879	132.094	1.14	3.66	405.041	1.2392	1.35	31.22	0.306497	546.806	91.7898	0.918055	0.281326	38	2.44141
2021-02-09 21:30:00	334.125	17.0838	6.06675	136.362	1.14	3.66	414.651	1.2392	1.35	31.22	0.298327	559.778	91.3372	0.794284	0.281326	38	2.46975
2021-02-09 22:30:00	336.625	17.0823	6.02471	129.605	1.14	3.66	409.763	1.2392	1.35	31.22	0.302764	553.18	90.9309	0.871119	0.281326	38	2.49583
2021-02-09 23:30:00	338.438	17.5068	7.30165	125.395	1.14	4.08854	410.091	1.2392	1.35	21.16	0.497847	553.623	98.4328	0.769603	0.281326	38	2.5118
2021-02-10 00:30:00	338.25	17.8646	6.25	118.34	1.14	4.08604	410.419	1.2392	1.35	21.16	0.48857	554.066	94.7925	0.870354	0.281326	38	2.55485
2021-02-10 01:30:00	349.125	16.0806	6.29444	120.536	1.14	4.08354	408.932	1.2392	1.35	21.16	0.44814	552.059	93.2463	0.890764	0.281326	38	2.48466
2021-02-10 02:30:00	346.812	17.4594	5.92	116.994	1.14	4.08104	410.51	1.2392	1.35	24.74	0.4003	554.189	90.6401	0.848908	0.281326	38	2.51766
2021-02-10 03:30:00	332.438	16.9468	6.36	114.746	1.14	4.07854	410.229	1.2392	1.35	24.74	0.367664	553.809	89.4152	0.829155	0.281391	38	2.6096
2021-02-10 04:30:00	341.5	13.4629	6.58	117.343	1.14	4.07604	404.122	1.2392	1.35	24.74	0.288645	545.564	84.7385	0.821697	0.283372	38	2.54377
2021-02-10 05:30:00	335.75	15.5677	5.26	122.454	1.14	4.07354	411.451	1.2392	1.35	24.74	0.322184	555.459	84.7059	0.863367	0.285354	38	2.54313
2021-02-10 06:30:00	337.562	16.8985	4.96	120.6	1.14	4.07104	415.61	1.2392	1.35	24.74	0.353723	561.074	86.0759	0.866324	0.287335	38	2.54471
2021-02-10 07:30:00	341.125	16.9895	4.96	120.191	1.14	4.0751	411.82	1.2392	1.35	24.74	0.366406	555.957	86.958	0.93921	0.289317	38	2.52787
2021-02-10 08:30:00	335.188	17.6341	6.02	119.362	1.14	4.08385	414.009	1.2392	1.35	24.74	0.385221	558.913	90.1182	0.888858	0.291298	38	2.56496
2021-02-10 09:30:00	340.938	17.2664	4.86	120.745	1.14	4.0926	400.648	1.2392	1.35	24.74	0.388816	540.875	88.3818	0.795448	0.29328	38	2.52627
2021-02-10 10:30:00	333.438	16.6793	4.86	121.996	1.14	4.10135	419.354	1.2392	1.35	24.74	0.335115	566.128	84.3948	0.988903	0.295261	38	2.55761
2021-02-10 11:30:00	326.375	16.5823	5.44	130.65	1.14	4.1101	411.519	1.2392	1.35	24.74	0.343682	555.551	87.2807	0.919392	0.297028	38	2.54293
2021-02-10 12:30:00	337.438	17.1458	6.41	159.72	1.14	4.11885	415.263	1.2392	1.35	27.75	0.350529	560.605	94.2526	0.831624	0.297028	38	2.32747
2021-02-10 13:30:00	339.688	16.78	7.33	115.188	1.14	4.1276	414.31	1.2392	1.35	27.75	0.329526	559.319	89.7306	1.3261	0.297028	38	2.56395
2021-02-10 14:30:00	341.438	17.6816	6.86	120.186	1.14	4.13635	416.109	1.2392	1.35	27.75	0.350812	561.747	90.5827	1.38569	0.297028	38	2.52386
2021-02-10 15:30:00	345.062	15.4501	6.36885	119.736	1.14	4.14	415.175	1.2392	1.35	27.75	0.293219	560.486	85.5441	1.15855	0.297028	38	2.50879
2021-02-10 16:30:00	339.438	18.1609	6.32637	111.951	1.14	3.66	414.792	1.2392	1.35	28.89	0.348414	559.969	91.4345	1.03089	0.297028	38	2.58714
2021-02-10 17:30:00	338.812	17.3282	5.54	101.586	1.14	3.66	415.1	1.2392	1.35	28.89	0.315562	560.385	87.0174	1.06581	0.297028	38	2.65753
2021-02-10 18:30:00	344.062	15.6851	6.06378	107.069	1.14	3.66	410.635	1.2392	1.35	28.89	0.293702	554.357	87.1605	1.0475	0.297028	38	2.59225
2021-02-10 19:30:00	338.5	17.51	6.09622	108.267	1.14	3.66	404.149	1.2392	1.35	28.89	0.340173	545.601	90.4644	0.976956	0.2968	38	2.61614
2021-02-10 20:30:00	334	17.3471	6.49	110.8	1.14	3.66	414.67	1.2392	1.35	28.89	0.323198	559.805	90.2152	1.13851	0.295808	38	2.62436
2021-02-10 21:30:00	341.562	16.5044	6.49	118.686	1.14	3.66	401.105	1.2392	1.35	28.89	0.331839	541.492	92.0868	1.1042	0.294816	38	2.53373
2021-02-10 22:30:00	338.75	16.3594	7.23	134.612	1.14	3.66	412.034	1.2392	1.35	28.89	0.32887	556.245	95.3656	1.14726	0.293824	38	2.45476
2021-02-10 23:30:00	343	16.9976	5.66847	141.344	1.14	3.89	413.417	1.2392	1.35	25.2622	0.383339	558.113	92.7029	1.06347	0.292831	38	2.39726
2021-02-11 00:30:00	327.25	14.0491	5.58712	129.446	1.14	3.89	415.345	1.2392	1.35	25.2659	0.270392	560.715	83.3189	1.04413	0.291839	38	2.54495
2021-02-11 01:30:00	335.125	17.1026	5.19	125.5	1.14	3.89	410.841	1.2392	1.35	25.2697	0.36402	554.636	89.0149	0.977457	0.290847	38	2.52739
2021-02-11 02:30:00	337.688	16.4438	5.47	122.07	1.14	3.89	405.796	1.2392	1.35	25.2734	0.357086	547.824	89.035	1.10789	0.289855	38	2.53383
2021-02-11 03:30:00	347.312	17.268	6.72	105.175	1.14	3.64	419.472	1.2392	1.35	25.2772	0.386999	566.287	92.366	1.30967	0.292427	38	2.5848
2021-02-11 04:30:00	350.5	15.7035	5.7507	124.054	1.14	3.64	416.764	1.2392	1.35	25.2809	0.350643	562.631	90.6143	1.20544	0.302417	38	2.45585
2021-02-11 05:30:00	338.438	16.5186	5.14	121.836	1.14	3.64	417.152	1.2392	1.35	25.2847	0.349038	563.156	88.901	1.32824	0.312407	38	2.52998
2021-02-11 06:30:00	352.875	13.0905	5.68	119.573	1.14	3.64	413.606	1.2392	1.35	25.2884	0.278058	558.368	84.9965	1.23606	0.322397	38	2.46928
2021-02-11 07:30:00	346.25	16.4835	5.48	118.47	1.14	3.64	413.774	1.2392	1.35	25.29	0.365006	558.595	90.3455	1.2429	0.332386	38	2.5095
2021-02-11 08:30:00	347.438	15.35	6.81	116.55	1.14	3.64	416.73	1.2392	1.35	25.29	0.344022	562.585	91.7779	1.26942	0.342376	38	2.51453
2021-02-11 09:30:00	347.812	16.7378	5.7	102.423	1.14	3.64	418.28	1.2392	1.35	25.29	0.362506	564.678	88.9244	1.53397	0.352366	38	2.59784
2021-02-11 10:30:00	350.375	16.6732	5.7	102.108	1.14	3.64	417.698	1.2392	1.35	25.29	0.364737	563.892	89.0373	1.45403	0.362355	38	2.58601
2021-02-11 11:30:00	322.062	14.5833	4.72	114.402	1.14	3.64	417.892	1.2392	1.35	25.29	0.266809	564.154	81.0496	1.61005	0.361251	38	2.66649
2021-02-11 12:30:00	348	16.472	5.54	119.962	1.14	4.24	418.58	1.2392	1.35	20.19	0.454223	565.084	90.4047	1.42166	0.347427	38	2.4907
2021-02-11 13:30:00	350.25	16.5051	4.13	114.475	1.14	4.24	418.165	1.2392	1.35	20.19	0.436056	564.522	85.9733	1.50976	0.333603	38	2.51099
2021-02-11 14:30:00	340.062	15.5313	5.04	107.978	1.14	4.24	413.747	1.2392	1.35	20.19	0.396645	558.559	84.6918	1.36644	0.319779	38	2.60687
2021-02-11 15:30:00	300.125	17.2924	5.43	108.371	1.14	4.24	409.933	1.2392	1.35	20.19	0.398132	553.409	85.7141	1.38822	0.305955	38	2.84885
2021-02-11 16:30:00	295.125	16.9082	3	108.345	1.14	4.65	417.772	1.2392	1.35	25.17	0.236585	563.992	67.3037	1.19782	0.292131	38	2.88433
2021-02-11 17:30:00	333.25	16.0511	3	101.26	1.14	4.65	416.882	1.2392	1.35	25.17	0.26656	562.79	70.5912	1.14495	0.278307	38	2.69221
2021-02-11 18:30:00	338.688	16.6641	4.18176	100.63	1.14	4.65	408.03	1.2392	1.35	25.17	0.315153	550.84	77.4191	1.34239	0.264483	38	2.6632
2021-02-11 19:30:00	340.062	16.5722	4.22496	104.908	1.14	4.65	414.834	1.2392	1.35	25.17	0.307765	560.025	76.9789	1.25488	0.263455	38	2.62761
2021-02-11 20:30:00	315.5	16.7044	5.03135	104.735	1.14	4.65	410.536	1.2392	1.35	25.17	0.289626	554.224	76.6614	1.24784	0.274465	38	2.77666
2021-02-11 21:30:00	299.125	16.5073	4.96368	111.908	1.14	4.65	417.171	1.2392	1.35	25.17	0.25546	563.18	73.3371	1.30083	0.285475	38	2.82939
2021-02-11 22:30:00	300.75	16.2792	6.29	120.425	1.14	4.65	414.172	1.2392	1.35	25.17	0.27538	559.132	79.1571	1.42904	0.296485	38	2.75557
2021-02-11 23:30:00	296.25	16.5343	5.52	123.033	1.14	4.2	402.826	1.2392	1.35	27.73	0.264809	543.815	81.5248	1.53377	0.307495	38	2.76444
2021-02-12 00:30:00	297.625	17.1337	6.59	119.719	1.14	4.2	402.48	1.2392	1.35	27.73	0.290712	543.349	85.8956	1.51679	0.318506	38	2.77972
2021-02-12 01:30:00	301.125	15.4855	5.21	120.691	1.14	4.2	418.865	1.2392	1.35	27.73	0.225843	565.467	75.9437	1.68152	0.329516	38	2.74954
2021-02-12 02:30:00	291.875	17.0163	7	119.856	1.14	4.2	418.065	1.2392	1.35	27.73	0.267519	564.387	84.2984	1.6381	0.340526	38	2.81491
2021-02-12 03:30:00	311.375	16.8435	5.29016	123.294	1.14	3.78	411.737	1.2392	1.35	28.54	0.282437	555.845	85.4306	1.70694	0.346833	38	2.66924
2021-02-12 04:30:00	320	16.8729	5.21148	115.813	1.14	3.78	409.959	1.2392	1.35	28.54	0.291562	553.444	85.2942	1.71683	0.350836	38	2.66859
2021-02-12 05:30:00	315	17.1535	5.97	115.505	1.14	3.78	409.682	1.2392	1.35	28.54	0.299315	553.071	87.4382	1.77638	0.354838	38	2.70003
2021-02-12 06:30:00	319.562	16.484	6.69	113.92	1.14	3.78	409.921	1.2392	1.35	28.54	0.295188	553.393	88.5049	1.80289	0.358841	38	2.68337
2021-02-12 07:30:00	318.438	17.015	6.32	117.435	1.14	3.78	410.159	1.2392	1.35	28.54	0.30425	553.715	88.7392	1.90632	0.362843	38	2.66572
2021-02-12 08:30:00	317.75	16.9652	5.97	113.717	1.14	3.78	409.612	1.2392	1.35	28.54	0.29758	552.977	87.1204	2.0184	0.366846	38	2.69423
2021-02-12 09:30:00	319.562	16.4552	6.37	121.625	1.14	3.78	410.104	1.2392	1.35	28.54	0.295366	553.641	88.7531	2.01578	0.370848	38	2.63088
2021-02-12 10:30:00	335.5	16.7841	6.37	118.182	1.14	3.78	401.022	1.2392	1.35	28.54	0.331445	541.379	90.9444	2.03381	0.374851	38	2.5639
2021-02-12 11:30:00	335.312	16.8558	5.66	119.732	1.14	3.78	411.908	1.2392	1.35	28.54	0.313947	556.076	88.1545	2.11598	0.36564	38	2.55496
2021-02-12 12:30:00	329.562	16.5663	4.79	111.479	1.14	3.975	414.544	1.2392	1.35	21.66	0.388378	559.634	86.2291	2.02796	0.353636	38	2.6399
2021-02-12 13:30:00	332.375	16.0867	6.44	121.7	1.14	4.14823	410.447	1.2392	1.35	21.66	0.406226	554.103	91.1845	1.98905	0.341633	38	2.55952
2021-02-12 14:30:00	343.625	16.9275	5.42	122.839	1.14	4.12448	417.412	1.2392	1.35	21.66	0.430258	563.507	90.2835	2.0098	0.329629	38	2.49339
2021-02-12 15:30:00	346.75	16.9001	7.12	113.528	1.14	4.10073	419.918	1.2392	1.35	21.66	0.447746	566.89	93.8172	1.93141	0.317626	38	2.53289
2021-02-12 16:30:00	349.875	16.2505	5.91	117.269	1.14	4.07698	420.008	1.2392	1.35	21.07	0.432169	567.01	90.8091	1.75894	0.305623	38	2.49531
2021-02-12 17:30:00	293.062	16.6539	7.24	119.122	1.14	4.05323	415.376	1.2392	1.35	21.07	0.376319	560.758	91.1002	1.72956	0.293619	38	2.81233
2021-02-12 18:30:00	335.312	16.5575	6.23	116.299	1.14	4.02948	419.865	1.2392	1.35	21.07	0.423853	566.817	91.1756	1.59645	0.281616	38	2.57953
2021-02-12 19:30:00	320.938	16.606	4.9	116.645	1.14	4.00573	392.694	1.2392	1.35	21.07	0.426412	530.137	89.3708	1.58321	0.282475	38	2.65873
2021-02-12 20:30:00	312.625	15.962	5.94538	119.228	1.14	3.98198	394.145	1.2392	1.35	21.07	0.404666	532.095	90.9162	1.55845	0.283652	38	2.69055
2021-02-12 21:30:00	329.875	14.305	6.00692	117.723	1.14	3.98	406.889	1.2392	1.35	21.07	0.355663	549.301	87.232	1.67666	0.284829	38	2.60018
2021-02-12 22:30:00	338.688	16.6329	2.4	119.438	1.14	3.98	423.46	1.2392	1.35	21.07	0.377168	571.671	80.6453	1.59066	0.286006	38	2.54191
2021-02-12 23:30:00	351	16.9487	2.18	116.613	1.14	3.63	419.013	1.2392	1.35	24.25	0.358832	565.667	82.7408	1.70382	0.287183	38	2.49375
2021-02-13 00:30:00	348.688	16.1157	3.22	120.396	1.14	3.63	408.248	1.2392	1.35	24.25	0.357315	551.135	84.9837	1.59445	0.28836	38	2.48408
2021-02-13 01:30:00	347.125	16.0562	6.59	118.397	1.14	3.63	407.9	1.2392	1.35	24.25	0.393146	550.665	94.1944	1.81704	0.290083	38	2.50264
2021-02-13 02:30:00	349.75	16.4966	6.59	126.599	1.14	3.63	406.565	1.2392	1.35	24.25	0.417794	548.862	96.3796	1.79076	0.293087	38	2.44235
2021-02-13 03:30:00	350.438	15.7501	6.08263	117.005	1.14	4.73	409.5	1.2392	1.35	27.56	0.294422	552.825	81.2724	1.91604	0.296091	38	2.49322
2021-02-13 04:30:00	354.188	16.2119	6.05105	118.469	1.14	4.73	409.68	1.2392	1.35	27.56	0.312301	553.068	82.9015	1.9793	0.299095	38	2.46539
2021-02-13 05:30:00	350.438	16.3925	5.92333	124.5	1.14	4.73	412.647	1.2392	1.35	27.56	0.310607	557.074	83.0131	2.04607	0.302099	38	2.44947
2021-02-13 06:30:00	350.625	16.4798	5.81016	120.488	1.14	4.73	409.536	1.2392	1.35	27.56	0.31383	552.873	82.7571	2.07702	0.305103	38	2.47121
2021-02-13 07:30:00	335.5	16.2051	5.89309	128.146	1.14	4.73	427.54	1.2392	1.35	27.56	0.270749	577.179	79.2158	2.02871	0.308107	38	2.50409
2021-02-13 08:30:00	336.688	17.1072	5.33	121.775	1.14	4.73	419.215	1.2392	1.35	27.56	0.295874	565.94	80.1218	1.01008	0.311111	38	2.54133
2021-02-13 09:30:00	336.562	16.6998	6.13058	123.643	1.14	4.73	411.536	1.2392	1.35	27.56	0.304074	555.573	82.8366	0.94333	0.298524	38	2.53111
2021-02-13 10:30:00	344.688	15.6791	6.20992	121.853	1.14	4.73	411.581	1.2392	1.35	27.56	0.286861	555.635	81.2818	Not Connect	0.281326	38	#VALUE!
2021-02-13 11:30:00	337.812	16.0278	5.91	115.213	1.14	3.85917	413.467	1.2392	1.35	21.72	0.404884	558.181	90.6599	Not Connect	0.281326	38	#VALUE!
2021-02-13 12:30:00	333.812	15.5282	5.91	120.355	1.14	3.84917	410.441	1.2392	1.35	21.72	0.389974	554.096	90.5433	Not Connect	0.281326	38	#VALUE!
2021-02-13 13:30:00	319.625	16.3792	4.92315	113.982	1.14	3.83917	418.38	1.2392	1.35	21.72	0.367006	564.813	86.001	Not Connect	0.281326	38	#VALUE!
2021-02-13 14:30:00	329.062	17.7431	6.47	115.036	1.14	3.82917	410.688	1.2392	1.35	21.72	0.460126	554.429	94.9017	Not Connect	0.281326	38	#VALUE!
2021-02-13 15:30:00	335.625	17.2555	5.02	120.649	1.14	3.81917	414.084	1.2392	1.35	20.65	0.462007	559.013	92.0892	Error	Error	38	#VALUE!
2021-02-13 16:30:00	336.438	15.9748	5.02	120.039	1.14	3.80917	415.667	1.2392	1.35	20.65	0.415224	561.15	89.5245	Error	0.25063	38	#VALUE!
2021-02-13 17:30:00	337.25	16.9375	6.52	122.546	1.14	3.79917	410.465	1.2392	1.35	20.65	0.483835	554.127	96.9227	Error	Comm Fail	38	#VALUE!
2021-02-13 18:30:00	351.312	16.3997	6.52	154.926	1.14	3.78917	421.145	1.2392	1.35	20.65	0.496407	568.546	101.157	Error	0.228094	38	#VALUE!
2021-02-13 19:30:00	346.688	16.7057	4.91	120.489	1.14	3.78	424.276	1.2392	1.35	20.65	0.445116	572.773	90.9017	Error	0.230065	38	#VALUE!
2021-02-13 20:30:00	375.375	17.2736	6.14	126.492	1.14	3.78	406.151	1.2392	1.35	20.65	0.572644	548.304	99.9947	Error	0.232036	38	#VALUE!
2021-02-13 21:30:00	358.625	16.3473	5.44828	126.878	1.14	3.78	409.655	1.2392	1.35	20.65	0.488775	553.035	95.2127	Error	0.234007	38	#VALUE!
2021-02-13 22:30:00	346.875	16.2621	5.53103	118.072	1.14	3.78	407.177	1.2392	1.35	20.65	0.464517	549.689	93.4735	Error	0.235978	38	#VALUE!
2021-02-13 23:30:00	350.25	15.836	5.2	128.112	1.14	4.0275	409.853	1.2392	1.35	26.39	0.32955	553.301	86.7558	Error	0.237949	38	#VALUE!
2021-02-14 00:30:00	344.562	16.7865	5.2	117.532	1.14	4.05	409.801	1.2392	1.35	26.39	0.343076	553.231	86.5981	Error	0.23992	38	#VALUE!
2021-02-14 01:30:00	348.75	16.66	6.25124	125.12	1.14	4.0725	409.748	1.2392	1.35	26.39	0.360392	553.16	90.5474	Error	0.241891	38	#VALUE!
2021-02-14 02:30:00	347.25	16.6584	6.32205	125.726	1.14	4.095	410.104	1.2392	1.35	18.64	0.549332	553.64	98.0014	Error	0.241123	38	#VALUE!
2021-02-14 03:30:00	363.75	16.72	6.39286	115.944	1.14	4.1175	410.459	1.2392	1.35	18.64	0.577256	554.119	98.0345	Error	0.24009	38	#VALUE!
2021-02-14 04:30:00	353.938	16.6374	6.16	117.92	1.14	4.14	408.948	1.2392	1.35	18.64	0.553528	552.08	96.733	Error	0.239057	38	#VALUE!
2021-02-14 05:30:00	360.875	16.466	6.39	119.576	1.14	4.1625	413.872	1.2392	1.35	18.64	0.554772	558.727	97.2333	Error	0.238024	38	#VALUE!
2021-02-14 06:30:00	356.688	17.0022	6.15	114.959	1.14	4.185	415.529	1.2392	1.35	18.64	0.557772	560.964	96.171	Error	0.23699	38	#VALUE!
2021-02-14 07:30:00	360.312	17.2901	5.89	117.03	1.14	4.2	413.857	1.2392	1.35	18.64	0.578736	558.706	96.746	Error	0.235957	38	#VALUE!
2021-02-14 08:30:00	361.688	16.3538	4.69	112.734	1.14	4.2	419.37	1.2392	1.35	18.64	0.506396	566.149	90.3472	2.01743	0.234924	38	2.4607
2021-02-14 09:30:00	361.312	16.7389	5.02	109.496	1.14	4.2	408.937	1.2392	1.35	18.64	0.546415	552.065	92.9714	2.03275	0.24773	38	2.48105
2021-02-14 10:30:00	302.312	17.2639	5.02	142.126	1.14	4.2	406.711	1.2392	1.35	18.64	0.470007	549.059	92.1666	2.02147	102.823	38	2.12901
2021-02-14 11:30:00	370.125	16.4919	5.64105	142.582	1.14	4.2	417.772	1.2392	1.35	18.64	0.571239	563.993	98.3828	2.10025	61.3624	38	2.03276
2021-02-14 12:30:00	358.125	15.954	5.70421	122.762	1.14	3.85625	422.272	1.2392	1.35	28.99	0.301056	570.067	87.0797	2.00384	148.723	38	1.86774
2021-02-14 13:30:00	348.5	16.996	6.35	129.18	1.14	3.86875	420.397	1.2392	1.35	28.99	0.327034	567.536	90.8415	47.8187	69.8943	38	1.97528
2021-02-14 14:30:00	346.562	17.1868	6.86	98.604	1.14	3.88125	419.987	1.2392	1.35	28.99	0.31798	566.982	87.7486	18.0022	78.8946	38	2.18
2021-02-14 15:30:00	353.062	15.5525	5.13667	123.773	1.14	3.89375	409.628	1.2392	1.35	28.99	0.292731	552.997	85.4648	28.2827	79.7129	38	2.01241
2021-02-14 16:30:00	347.812	16.8716	5.0664	129.859	1.14	3.90625	415.89	1.2392	1.35	28.16	0.324954	561.452	87.552	29.3979	90.0333	38	1.96948
2021-02-14 17:30:00	266.125	16.6638	5.94517	143.222	1.14	3.91875	406.833	1.2392	1.35	28.16	0.244336	549.225	85.2139	26.6563	101.433	38	2.17366
2021-02-14 18:30:00	368	16.9492	5.85873	131.969	1.14	3.93125	406.633	1.2392	1.35	28.16	0.372966	548.955	92.4362	30.4217	82.9827	38	1.91785
2021-02-14 19:30:00	372.312	16.9835	5.02	125.508	1.14	3.94375	409.434	1.2392	1.35	28.16	0.363206	552.735	89.4063	32.4156	81.0089	38	1.9271
2021-02-14 20:30:00	366.75	18.5607	5.82297	124.865	1.14	3.935	407.798	1.2392	1.35	28.16	0.410129	550.527	93.4044	30.8636	89.2744	38	1.92582
2021-02-14 21:30:00	360.438	16.906	5.83919	133.854	1.14	3.905	401.341	1.2392	1.35	28.16	0.370488	541.811	92.7648	30.6379	79.5206	38	1.9445
2021-02-14 22:30:00	364.062	17.5657	5.66	130.25	1.14	3.875	416.105	1.2392	1.35	17.81	0.64624	561.742	101.101	46.234	60.6106	38	1.95642
2021-02-14 23:30:00	358.875	16.2605	4.63	127.959	1.14	3.845	409.514	1.2392	1.35	17.81	0.567994	552.844	95.8373	33.2849	72.5808	38	1.98454
2021-02-15 00:30:00	366.062	16.1083	5.06	130.017	1.14	3.815	420.704	1.2392	1.35	17.81	0.563619	567.95	96.684	29.5042	69.8349	38	1.97482
2021-02-15 01:30:00	371.938	16.3379	6.14	128.904	1.14	3.785	420.593	1.2392	1.35	17.81	0.606505	567.8	100.932	27.2372	69.0766	38	1.96974
2021-02-15 02:30:00	364.25	15.8421	6.8	127.121	1.14	3.755	421.205	1.2392	1.35	19.45	0.517753	568.627	99.2332	33.4118	69.7887	38	1.97886
2021-02-15 03:30:00	365.812	16.0144	7.22	133.639	1.14	3.725	424.082	1.2392	1.35	19.45	0.536018	572.51	101.886	33.7469	71.2401	38	1.94463
2021-02-15 04:30:00	370.75	16.8794	4.38	132.272	1.14	3.71	410.573	1.2392	1.35	19.45	0.557311	554.274	96.0073	30.6909	70.1092	38	1.94715
2021-02-15 05:30:00	366.062	16.6083	4.38	123.854	1.14	3.71	412.855	1.2392	1.35	19.45	0.527809	557.354	94.1122	31.3577	68.2573	38	1.99678
2021-02-15 06:30:00	370	16.4771	5.58037	125.553	1.14	3.71	414.555	1.2392	1.35	19.45	0.547054	559.65	97.6751	28.8392	70.6048	38	1.97819
2021-02-15 07:30:00	372.312	16.4663	5.60232	134.623	1.14	3.71	409.916	1.2392	1.35	19.45	0.566839	553.386	99.5185	31.4733	72.9829	38	1.92275
2021-02-15 08:30:00	318.375	16.6569	5.62427	126.836	1.14	3.71	406.468	1.2392	1.35	19.45	0.472451	548.731	95.0831	30.0735	47.4572	38	2.24199
2021-02-15 09:30:00	368.438	16.1618	4.77	131.736	1.14	3.71	409.32	1.2392	1.35	19.45	0.531282	552.582	95.8931	29.8626	0.305872	38	2.20813
2021-02-15 10:30:00	348.062	17.2519	4.77	122.325	1.14	3.71	422.123	1.2392	1.35	19.45	0.507901	569.866	93.7513	26.9634	70.4224	38	2.07179
2021-02-15 11:30:00	346.125	17.3001	5.62049	122.628	1.14	3.71	421.872	1.2392	1.35	19.45	0.519923	569.527	96.1814	26.0296	71.4341	38	2.07717
2021-02-15 12:30:00	280	16.2156	5.5961	123.745	1.14	4.05	405.309	1.2392	1.35	25.54	0.264808	547.167	81.5044	30.737	68.7634	38	2.32781
2021-02-15 13:30:00	322.5	17.2183	4.42673	146.797	1.14	4.05	408.714	1.2392	1.35	25.54	0.342324	551.763	86.8742	34.6666	30.042	38	2.18515
2021-02-15 14:30:00	326.375	17.0703	4.40864	128.866	1.14	4.05	413.004	1.2392	1.35	25.54	0.330574	557.555	84.4926	18.7916	0.261473	38	2.46131
2021-02-15 15:30:00	352.562	17.5743	4.39055	119.389	1.14	4.05	410.762	1.2392	1.35	25.54	0.381626	554.529	87.2305	39.3217	61.2849	38	2.05642
2021-02-15 16:30:00	336.125	17.443	8.68	125.66	1.14	3.68	414.127	1.2392	1.35	31.62	0.323234	559.072	97.4598	26.9218	59.8933	38	2.14024
2021-02-15 17:30:00	342.875	16.4325	8.68	135.309	1.14	3.68	419.542	1.2392	1.35	31.62	0.308942	566.382	98.1994	29.5812	59.5479	38	2.067
2021-02-15 18:30:00	351.875	17.6721	7.67	139.558	1.14	3.68	421.133	1.2392	1.35	31.62	0.336579	568.53	97.3026	32.0141	59.608	38	2.01096
2021-02-15 19:30:00	342	16.5825	6.4	132.377	1.14	3.68	423.153	1.2392	1.35	31.62	0.28412	571.257	90.4937	31.8473	56.794	38	2.08372
2021-02-15 20:30:00	354.25	16.4302	8.8	137.779	1.14	3.68	417.409	1.2392	1.35	31.62	0.325764	563.502	99.7258	31.6903	57.4622	38	2.01807
2021-02-15 21:30:00	362.875	16.4141	8.8	129.106	1.14	3.68	416.296	1.2392	1.35	31.62	0.330099	561.999	98.4844	31.1287	59.2853	38	2.01807
2021-02-15 22:30:00	370.938	18.2101	8.2	122.743	1.14	3.68	410.982	1.2392	1.35	31.62	0.378049	554.826	98.1869	30.121	59.959	38	2.01647
2021-02-15 23:30:00	353.125	16.9704	4.52	99.5861	1.14	3.98156	414.058	1.2392	1.35	28.19	0.316304	558.978	83.1713	33.0333	47.5164	38	2.21452
2021-02-16 00:30:00	351.5	16.5196	4.77	120.199	1.14	3.98531	410.454	1.2392	1.35	28.19	0.317023	554.112	85.2822	34.7269	60.0358	38	2.07751
2021-02-16 01:30:00	350.312	16.4657	5.61	128.411	1.14	3.98906	404.45	1.2392	1.35	28.19	0.333839	546.008	89.0831	41.2419	59.6931	38	2.02764
2021-02-16 02:30:00	347.875	16.4626	5.11431	121.551	1.14	3.99281	405.019	1.2392	1.35	28.19	0.321413	546.776	86.506	37.0424	58.3737	38	2.08262
2021-02-16 03:30:00	347.188	17.1503	5.13382	115.533	1.14	3.99656	405.588	1.2392	1.35	28.19	0.335341	547.543	86.9288	30.7032	59.0119	38	2.13114
2021-02-16 04:30:00	349.062	16.3583	6.8	115.23	1.14	4.00031	404.547	1.2392	1.35	26.7	0.35642	546.138	91.0197	29.2929	60.9057	38	2.12363
2021-02-16 05:30:00	347.844	17.2337	4.86039	126.366	1.14	4.00406	405.598	1.2392	1.35	26.7	0.362295	547.557	88.3569	29.189	59.6332	38	2.08669
2021-02-16 06:30:00	346.625	16.4607	4.78008	117.391	1.14	4.00781	402.245	1.2392	1.35	26.7	0.338323	543.03	85.9727	32.6611	69.9571	38	2.0783
2021-02-16 07:30:00	350.75	15.7904	5.43953	122.84	1.14	4.01573	398.892	1.2392	1.35	26.7	0.338727	538.504	87.9344	28.8143	63.7063	38	2.07744
2021-02-16 08:30:00	348.75	16.1994	5.4798	123.084	1.14	4.02948	406.575	1.2392	1.35	26.7	0.338074	548.876	87.6969	32.2234	65.0155	38	2.06683
2021-02-16 09:30:00	348.625	16.3185	6.21723	124.514	1.14	4.04323	406.652	1.2392	1.35	26.7	0.349885	548.98	90.1474	32.1783	67.7481	38	2.05215
2021-02-16 10:30:00	347	15.1391	6.24819	118.371	1.14	4.05698	411.545	1.2392	1.35	26.7	0.305434	555.586	86.2484	36.0534	63.7909	38	2.08288
2021-02-16 11:30:00	357.562	15.925	6.27916	127.186	1.14	4.07073	408.365	1.2392	1.35	26.7	0.349525	551.293	90.3525	37.0123	58.9239	38	2.02474
2021-02-16 12:30:00	350.125	16.7489	6.02	122.374	1.14	4.08448	414.969	1.2392	1.35	26.6791	0.348869	560.208	88.9148	31.6798	60.2562	38	2.08366
2021-02-16 13:30:00	368.562	16.1471	5.69	128.429	1.14	4.09823	414.734	1.2392	1.35	26.6478	0.355613	559.891	89.1532	32.3877	60.3407	38	1.99406
2021-02-16 14:30:00	368.25	16.551	6.22	125.041	1.14	4.11198	410.895	1.2392	1.35	26.6165	0.376546	554.708	91.2152	32.0214	60.2254	38	2.00946
2021-02-16 15:30:00	363.688	16.855	5.62	125.68	1.14	4.12	414.961	1.2392	1.35	26.5852	0.367673	560.198	89.3276	31.0501	65.2034	38	2.00888
2021-02-16 16:30:00	330.438	16.9367	6.22333	125.575	1.14	3.71833	414.936	1.2392	1.35	30.45	0.294144	560.164	89.6488	35.5199	66.0008	38	2.10705
2021-02-16 17:30:00	364.188	16.6595	6.29	126.524	1.14	3.71583	414.119	1.2392	1.35	30.45	0.32765	559.06	91.9325	30.6608	64.3087	38	2.00829
2021-02-16 18:30:00	369.688	16.5964	5.24	114.781	1.14	3.71333	414.947	1.2392	1.35	30.45	0.316546	560.178	88.0039	34.7716	60.4627	38	2.03398
2021-02-16 19:30:00	368.688	16.9575	5.24	119.33	1.14	3.71083	415.063	1.2392	1.35	30.45	0.326074	560.336	88.988	36.1022	60.9659	38	2.01364
2021-02-16 20:30:00	358.125	16.5184	5.74	124.691	1.14	3.70833	414.494	1.2392	1.35	30.45	0.311187	559.566	89.6309	39.5028	58.7813	38	2.02452
2021-02-16 21:30:00	347.562	16.5314	5.74	119.109	1.14	3.70583	417.5	1.2392	1.35	30.45	0.294314	563.625	87.9115	41.8557	59.0567	38	2.07406
2021-02-16 22:30:00	331.062	16.7958	4.45	127.885	1.14	3.70333	415.071	1.2392	1.35	30.45	0.275837	560.346	84.6418	31.66	58.9264	38	2.13554
2021-02-16 23:30:00	344.688	16.6018	5.31	126.3	1.14	3.70083	416.201	1.2392	1.35	30.22	0.295804	561.871	87.7717	36.379	52.6458	38	2.09763
2021-02-17 00:30:00	352.562	14.9887	4.34	114.561	1.14	3.7	416.5	1.2392	1.35	30.22	0.252882	562.274	81.3129	31.0348	0.214306	38	2.35568
2021-02-17 01:30:00	348.312	16.5453	5.29	117.499	1.14	3.7	413.747	1.2392	1.35	30.22	0.297365	558.558	87.0982	34.4662	50.7281	38	2.13548
2021-02-17 02:30:00	342.75	16.0607	6.96	119.205	1.14	3.635	410.994	1.2392	1.35	23.35	0.405328	554.842	95.3942	32.9368	50.6106	38	2.15548
2021-02-17 03:30:00	340.5	16.1934	5.52	113.513	1.14	3.44	419.014	1.2392	1.35	23.35	0.380224	565.669	91.0823	32.6883	49.6235	38	2.19441
2021-02-17 04:30:00	330.312	15.5277	5.08	116.203	1.14	3.44	423.316	1.2392	1.35	23.35	0.337144	571.477	87.7141	0.863091	0.218644	38	2.61238
2021-02-17 05:30:00	331.062	13.2805	5.91	114.329	1.14	3.44	411.25	1.2392	1.35	23.35	0.294661	555.187	86.8808	1.02948	0.258845	38	2.61903
2021-02-17 06:30:00	342.562	17.4817	4.85712	120.376	1.14	3.44	413.236	1.2392	1.35	23.35	0.426395	557.869	92.7487	1.02116	0.254255	38	2.51897
2021-02-17 07:30:00	339.438	17.1082	4.84849	115.036	1.14	3.44	409.885	1.2392	1.35	23.35	0.412042	553.344	91.6768	0.937352	12.8639	38	2.50173
2021-02-17 08:30:00	316.625	17.1673	5.43	141.555	1.14	3.44	404.064	1.2392	1.35	23.35	0.408389	545.486	95.6971	0.875715	0.279577	38	2.52903
2021-02-17 09:30:00	320.188	16.5051	6.15	146.238	1.14	3.44	350.712	1.2392	1.35	23.35	0.496605	473.461	103.887	1.0007	0.289185	38	2.48222
2021-02-17 10:30:00	325.438	17.0083	6.15	142.324	1.14	3.44	315.967	1.2392	1.35	23.35	0.596465	426.556	107.33	0.88317	2.26623	38	2.46883
2021-02-17 11:30:00	376.188	16.1614	4.34	142.464	1.14	3.44	424.814	1.2392	1.35	23.35	0.421405	573.498	92.8185	1.24661	51.2409	38	2.05011
2021-02-17 12:30:00	354.375	16.3287	6.13	139.902	1.14	3.91125	405.161	1.2392	1.35	25.55	0.390752	546.967	94.371	1.24379	0.310005	38	2.35109
2021-02-17 13:30:00	348.5	15.5836	5.43	120.981	1.14	3.89625	419.607	1.2392	1.35	25.55	0.323872	566.469	86.3118	1.46638	0.300513	38	2.48223
2021-02-17 14:30:00	346.625	17.4031	5.87	119.357	1.14	3.88125	426.704	1.2392	1.35	25.55	0.368142	576.051	89.8217	1.37723	0.291022	38	2.50184
2021-02-17 15:30:00	344	15.9927	5.27	120.424	1.14	3.86625	417.797	1.2392	1.35	25.55	0.330681	564.025	86.6204	1.33539	0.28153	38	2.5094
2021-02-17 16:30:00	341.375	16.0295	4.57	115.54	1.14	3.85125	408.889	1.2392	1.35	24.16	0.352183	552	85.8326	24.595	68.5123	38	2.14022
2021-02-17 17:30:00	330.75	15.9874	6.34	115.389	1.14	3.83625	414.153	1.2392	1.35	24.16	0.349987	559.106	89.4057	25.234	74.1597	38	2.15741
2021-02-17 18:30:00	339.875	15.375	5.72053	116.855	1.14	3.82125	411.162	1.2392	1.35	24.16	0.342496	555.069	87.8952	25.3014	74.7889	38	2.11415
2021-02-17 19:30:00	349	16.5573	5.81611	115.309	1.14	3.80625	408.171	1.2392	1.35	24.16	0.396383	551.031	91.3219	25.247	78.3495	38	2.07481
2021-02-17 20:30:00	352.562	16.3512	5.56	115.382	1.14	3.79854	424.43	1.2392	1.35	24.16	0.370253	572.981	88.9102	0.912733	51.6888	38	2.25786
2021-02-17 21:30:00	351.812	14.572	4.86	117.73	1.14	3.79604	414.86	1.2392	1.35	24.16	0.320285	560.061	84.5354	25.6037	63.0726	38	2.10856
2021-02-17 22:30:00	346.5	17.3995	5.2	114.991	1.14	3.79354	422.761	1.2392	1.35	24.74	0.380228	570.727	89.0496	25.7894	69.9125	38	2.11374
2021-02-17 23:30:00	350.938	16.1121	4.02	127.069	1.14	3.79104	417.279	1.2392	1.35	24.74	0.347518	563.326	85.6552	30.4101	59.1096	38	2.07032
2021-02-18 00:30:00	348.25	15.2155	4.02	122.978	1.14	3.78854	416.11	1.2392	1.35	24.74	0.317277	561.748	83.2152	29.7309	64.678	38	2.07907
2021-02-18 01:30:00	348.438	16.9809	5.22573	123.435	1.14	3.78604	412.355	1.2392	1.35	24.74	0.389598	556.679	90.685	29.2277	65.4273	38	2.07567
2021-02-18 02:30:00	354.438	17.3209	6.28	121.088	1.14	3.78354	413.888	1.2392	1.35	26.68	0.382388	558.748	92.853	26.081	64.7887	38	2.0773
2021-02-18 03:30:00	351.188	16.0505	5.54	112.816	1.14	3.78104	426.068	1.2392	1.35	26.68	0.316932	575.192	86.2855	41.8982	67.8529	38	2.05545
2021-02-18 04:30:00	335.25	16.3725	6.03	112.768	1.14	3.78437	419.608	1.2392	1.35	26.68	0.317689	566.471	87.4745	26.7588	64.52	38	2.18307
2021-02-18 05:30:00	330.875	18.2905	5.32	113.268	1.14	3.79187	419.864	1.2392	1.35	26.68	0.353765	566.816	88.4003	54.9441	68.3091	38	2.07764
2021-02-18 06:30:00	340.875	17.3391	6.42648	116.878	1.14	3.79938	419.198	1.2392	1.35	26.68	0.356535	565.917	91.0792	29.1366	63.5172	38	2.13806
2021-02-18 07:30:00	339.062	16.399	6.38961	116.426	1.14	3.80687	388.66	1.2392	1.35	26.68	0.367536	524.691	92.5321	26.2507	63.5831	38	2.15766
2021-02-18 08:30:00	339.875	16.2918	6.35274	116.236	1.14	3.81437	414.817	1.2392	1.35	26.68	0.331353	560.003	89.4083	25.0285	65.4992	38	2.15272
2021-02-18 09:30:00	338.938	16.5526	6.87	123.147	1.14	3.82187	414.678	1.2392	1.35	26.68	0.3466	559.816	92.2728	29.4993	69.152	38	2.09661
2021-02-18 10:30:00	346.375	17.3127	6.87	116.17	1.14	3.82938	415.037	1.2392	1.35	26.68	0.371853	560.3	92.6971	25.7401	0.324736	38	2.40019
2021-02-18 11:30:00	348.562	15.7301	6.35	116.496	1.14	3.83687	414.188	1.2392	1.35	26.68	0.327323	559.154	89.0597	27.0221	48.9331	38	2.1743
2021-02-18 12:30:00	351.938	16.8527	6.08	113.051	1.14	3.82687	422.515	1.2392	1.35	27.42	0.336756	570.396	88.8019	29.5785	69.6717	38	2.08906
2021-02-18 13:30:00	346.438	17.2937	5.51	122.758	1.14	3.80437	417.103	1.2392	1.35	27.42	0.347435	563.089	89.5374	29.2143	69.2084	38	2.07213
2021-02-18 14:30:00	346.188	17.2265	5.82	120.537	1.14	3.78187	420.002	1.2392	1.35	27.42	0.344628	567.003	89.8451	28.8818	70.3943	38	2.07899
2021-02-18 15:30:00	353.438	17.1633	6.24	127.328	1.14	3.75938	409.447	1.2392	1.35	27.42	0.374195	552.753	93.4939	25.7621	70.4316	38	2.03736
2021-02-18 16:30:00	352.375	17.682	5.68	114.608	1.14	3.73688	406.746	1.2392	1.35	26.21	0.398768	549.107	92.1103	27.2761	69.0878	38	2.09148
2021-02-18 17:30:00	347.75	18.137	6.21	116.581	1.14	3.71438	409.423	1.2392	1.35	26.21	0.408519	552.721	93.8325	26.2481	69.5169	38	2.10228
2021-02-18 18:30:00	341.938	17.2654	5.8	128.066	1.14	3.69187	417.574	1.2392	1.35	26.21	0.367831	563.725	92.0575	25.6	68.8014	38	2.08092
2021-02-18 19:30:00	330.125	17.3507	5.8	119.133	1.14	3.66938	418.354	1.2392	1.35	26.21	0.349024	564.777	90.1995	26.0421	74.9789	38	2.13735
2021-02-18 20:30:00	346	16.7717	5.35	115.648	1.14	3.65271	414.684	1.2392	1.35	26.21	0.353456	559.823	89.3717	28.4693	74.7204	38	2.08559
2021-02-18 21:30:00	340.125	16.2902	5.35	116.876	1.14	3.64021	410.496	1.2392	1.35	26.21	0.338698	554.169	88.7883	27.7393	74.3618	38	2.10576
2021-02-18 22:30:00	343.062	15.7842	6.6588	122.394	1.14	3.62771	410.772	1.2392	1.35	26.21	0.345954	554.543	92.8594	25.9648	75.5455	38	2.07462
2021-02-18 23:30:00	349.312	17.2074	6.56137	118.766	1.14	3.61521	411.049	1.2392	1.35	25.4	0.404756	554.916	94.9129	26.0544	73.4417	38	2.07426
2021-02-19 00:30:00	353	16.7828	5.83595	125.954	1.14	3.60271	407.651	1.2392	1.35	25.4	0.398445	550.329	94.0126	26.1989	81.5957	38	2.00501
2021-02-19 01:30:00	352.25	17.0541	5.93512	123.216	1.14	3.59021	409.632	1.2392	1.35	25.4	0.402589	553.003	94.1336	25.3675	73.7024	38	2.04768
2021-02-19 02:30:00	344.562	15.5593	5.36	123.544	1.14	3.57771	410.411	1.2392	1.35	25.4	0.341898	554.055	89.7481	25.3894	73.8002	38	2.07288
2021-02-19 03:30:00	347.812	17.1985	4.71714	134.869	1.14	3.56521	409.947	1.2392	1.35	28.11	0.348504	553.429	90.635	25.7757	75.7454	38	2.00932
2021-02-19 04:30:00	345.875	16.285	4.94	123.004	1.14	3.55417	410.404	1.2392	1.35	28.11	0.320184	554.045	88.5317	25.0566	83.8916	38	2.03646
2021-02-19 05:30:00	339.438	16.0988	5.58	123.957	1.14	3.54417	412.369	1.2392	1.35	28.11	0.312965	556.698	89.6236	25.3974	85.2484	38	2.04904
2021-02-19 06:30:00	336.812	15.9803	5.58	124.549	1.14	3.53417	412.215	1.2392	1.35	28.11	0.307681	556.49	89.4224	25.4819	85.8415	38	2.05346
2021-02-19 07:30:00	342.812	16.7781	5.8	116.177	1.14	3.52417	409.582	1.2392	1.35	28.11	0.336261	552.936	90.8684	25.2597	84.4626	38	2.07152
2021-02-19 08:30:00	342.562	16.548	5.91	118.282	1.14	3.51417	413.374	1.2392	1.35	28.11	0.32818	558.055	90.8164	26.9261	93.3935	38	2.02734
2021-02-19 09:30:00	335.375	16.3089	5.39	124.983	1.14	3.50417	411.848	1.2392	1.35	28.11	0.313527	555.994	89.5883	27.1489	84.6498	38	2.05508
2021-02-19 10:30:00	344.562	16.2419	5.39	114.418	1.14	3.49417	409.718	1.2392	1.35	28.11	0.320717	553.119	89.1038	27.696	84.7964	38	2.06265
2021-02-19 11:30:00	338.75	16.5037	6.08	116.184	1.14	3.48417	404.703	1.2392	1.35	28.11	0.333897	546.35	91.724	27.8082	85.9956	38	2.07142
2021-02-19 12:30:00	340	16.7234	5.66	122.954	1.14	3.48	413.8	1.2392	1.35	30.89	0.296189	558.63	89.8894	35.5452	84.761	38	2.01805
2021-02-19 13:30:00	337.438	16.7154	4.94	117.538	1.14	3.48	418.304	1.2392	1.35	30.89	0.280199	564.711	86.6565	30.0372	83.5557	38	2.07135
2021-02-19 14:30:00	329.812	16.9303	4.58	121.061	1.14	3.48	416.929	1.2392	1.35	30.89	0.275941	562.854	85.9208	31.5696	90.3684	38	2.05472
2021-02-19 15:30:00	335	16.806	5.04	113.508	1.14	3.48	425.991	1.2392	1.35	30.89	0.271575	575.088	85.6905	29.2814	80.7961	38	2.10938
2021-02-19 16:30:00	338.375	16.967	6.47	117.126	1.14	3.75219	427.492	1.2392	1.35	26.43	0.339225	577.114	90.1245	26.3968	82.8643	38	2.08512
2021-02-19 17:30:00	340.188	16.7895	4.75	126.013	1.14	3.73344	414.799	1.2392	1.35	26.43	0.338586	559.979	87.7369	25.0685	80.7574	38	2.05504
2021-02-19 18:30:00	338.875	17.38	6.4	121.978	1.14	3.71469	410.56	1.2392	1.35	26.43	0.374955	554.255	93.2604	38.6192	45.5913	38	2.15567
2021-02-19 19:30:00	332.688	18.244	6.06	122.35	1.14	3.69594	415.251	1.2392	1.35	26.43	0.38	560.589	92.7616	25.4712	80.6481	38	2.09549
2021-02-19 20:30:00	327.812	17.1433	5.07	126.584	1.14	3.67719	414.064	1.2392	1.35	26.43	0.337769	558.987	88.797	31.1566	84.327	38	2.06226
2021-02-19 21:30:00	329.438	16.8159	5.07	120.491	1.14	3.65844	422.092	1.2392	1.35	26.43	0.319945	569.825	86.9801	43.4022	80.0668	38	2.05295
2021-02-19 22:30:00	323.438	16.95	5.94	120.672	1.14	3.63969	412.198	1.2392	1.35	26.43	0.337013	556.468	90.4118	26.571	71.8966	38	2.16596
2021-02-19 23:30:00	334	16.299	5.22	127.11	1.14	3.62094	413.961	1.2392	1.35	27.25	0.316297	558.848	88.4806	26.4066	70.1714	38	2.10569
2021-02-20 00:30:00	332.438	17.188	6.14505	147.387	1.14	3.61	409.583	1.2392	1.35	27.25	0.363413	552.937	95.8313	25.1867	51.8599	38	2.09832
2021-02-20 01:30:00	349.062	17.188	6.09158	118.007	1.14	3.61	410.693	1.2392	1.35	27.25	0.367568	554.435	92.5608	46.172	79.4033	38	1.98926
2021-02-20 02:30:00	350.062	17.188	5.56	124.048	1.14	3.61	410.327	1.2392	1.35	27.25	0.366808	553.941	92.0233	26.6075	83.6336	38	2.01388
2021-02-20 03:30:00	352.625	17.188	5.88	123.485	1.14	4.71	409.96	1.2392	1.35	29.88	0.307384	553.446	83.8685	26.2651	78.1149	38	2.02716
2021-02-20 04:30:00	62.9375	17.188	6.3	111.904	1.14	4.71	71.8456	1.2392	1.35	29.88	0.5852	96.9916	156.778	27.5598	80.522	38	4.05837
2021-02-20 05:30:00	126.312	17.188	5.6	119.408	1.14	4.71	140.953	1.2392	1.35	29.88	0.425328	190.286	111.389	27.2849	76.5861	38	3.30811
2021-02-20 06:30:00	368.938	17.188	5.6	118.412	1.14	4.71	404.462	1.2392	1.35	29.88	0.329283	546.023	84.7194	25.7065	79.2802	38	1.99009
2021-02-20 07:30:00	329.688	17.188	5.3	121.911	1.14	4.71	410.961	1.2392	1.35	29.88	0.271419	554.797	79.4012	26.3349	81.1301	38	2.10332
2021-02-20 08:30:00	331.438	17.1742	6.17	116.624	1.14	4.71	407.674	1.2392	1.35	29.88	0.283001	550.36	81.7594	25.473	79.43	38	2.12859
2021-02-20 09:30:00	329.125	17.1594	6.36	124.469	1.14	4.71	410.592	1.2392	1.35	29.88	0.282353	554.299	82.8043	25.2203	79.8763	38	2.10338
2021-02-20 10:30:00	333.625	16.4997	5.90179	130.812	1.14	4.71	408.366	1.2392	1.35	29.88	0.273005	551.294	81.6956	27.9287	80.7505	38	2.04892
2021-02-20 11:30:00	349.375	16.109	5.97256	124.371	1.14	4.71	410.016	1.2392	1.35	29.88	0.277618	553.521	81.5834	27.164	78.6817	38	2.02979
2021-02-20 12:30:00	354.688	17.1092	6.04333	130.933	1.14	4.12833	409.502	1.2392	1.35	28.11	0.353621	552.827	90.5552	26.6481	81.0206	38	1.98128
2021-02-20 13:30:00	337.875	18.3874	6.1141	121.997	1.14	4.13833	413.507	1.2392	1.35	28.11	0.35517	558.234	89.7092	26.3019	81.4007	38	2.07266
2021-02-20 14:30:00	339.438	17.6297	5.59	119.839	1.14	4.14833	418.003	1.2392	1.35	28.11	0.325919	564.304	86.3928	28.6416	79.0698	38	2.07582
2021-02-20 15:30:00	337.625	19.7624	6.7531	126.408	1.14	4.15833	411.423	1.2392	1.35	28.11	0.401091	555.421	93.8537	32.3181	80.3794	38	2.03858
2021-02-20 16:30:00	330.5	17.4483	6.63586	117.021	1.14	4.16833	412.074	1.2392	1.35	24.4	0.384995	556.3	90.6211	33.7248	80.9961	38	2.09426
2021-02-20 17:30:00	336.438	17.6461	6.27865	112.109	1.14	4.17833	411.786	1.2392	1.35	24.4	0.392873	555.911	89.7624	31.6632	78.8914	38	2.10821
2021-02-20 18:30:00	337.812	18.2426	5.89	110.148	1.14	4.18833	410.586	1.2392	1.35	24.4	0.40887	554.291	89.7325	30.4721	84.1145	38	2.09664
2021-02-20 19:30:00	344.25	17.2199	6.11	112.623	1.14	4.19833	404.886	1.2392	1.35	24.4	0.400069	546.596	90.0091	29.4793	82.9243	38	2.07128
2021-02-20 20:30:00	339.188	19.5575	6.56	120.87	1.14	4.2	399.888	1.2392	1.35	24.4	0.483287	539.848	95.9651	27.4592	79.425	38	2.07547
2021-02-20 21:30:00	326.875	18.3465	6.56	122.193	1.14	4.2	402.51	1.2392	1.35	24.4	0.421684	543.389	93.2293	30.0818	85.5922	38	2.08265
2021-02-20 22:30:00	284.25	18.7642	4.81	5.54204	1.14	4.2	400.771	1.2392	1.35	24.4	0.282893	541.04	70.0183	27.9749	82.7035	38	3.02007
2021-02-20 23:30:00	10.5625	18.7642	5.05	5.39582	1.14	3.43	37.0391	1.2392	1.35	32.48	0.0397576	50.0028	32.5787	27.8486	84.9004	38	9.36014
2021-02-21 00:30:00	84.75	18.9038	4.69	101.18	1.14	3.43	19.2957	1.2392	1.35	32.48	2.71394	26.0492	143.325	24.6041	87.6957	38	3.87903
2021-02-21 01:30:00	358.812	18.1934	4.69	114.604	1.14	3.43	401.358	1.2392	1.35	32.48	0.33559	541.833	90.471	28.4251	86.2222	38	2.00592
2021-02-21 02:30:00	333.062	18.2997	6.64	111.698	1.14	3.43	410.884	1.2392	1.35	32.48	0.312641	554.693	92.4157	28.4223	83.3559	38	2.11786
2021-02-21 03:30:00	328	19.293	4.67	134.748	1.14	3.52	413.279	1.2392	1.35	20.45	0.537977	557.927	96.9976	26.9031	85.3404	38	2.04054
2021-02-21 04:30:00	339.062	18.431	5.17515	121.746	1.14	3.64	411.707	1.2392	1.35	20.45	0.529206	555.805	96.2521	29.4395	82.1077	38	2.05597
2021-02-21 05:30:00	341.062	17.7947	4.7	114.702	1.14	3.65375	417.35	1.2392	1.35	20.45	0.488733	563.423	92.7843	27.2174	85.3852	38	2.07347
2021-02-21 06:30:00	341.938	18.6034	5.56	119.313	1.14	3.6675	414.164	1.2392	1.35	20.45	0.539981	559.121	97.0595	28.1298	84.8251	38	2.05072
2021-02-21 07:30:00	336.25	18.8457	5.56	120.922	1.14	3.68125	415.452	1.2392	1.35	20.45	0.535747	560.86	96.9689	29.337	84.3809	38	2.0615
2021-02-21 08:30:00	343.375	17.4943	4.98	121.896	1.14	3.695	412.864	1.2392	1.35	20.45	0.496822	557.367	94.2693	28.726	49.956	38	2.15998
2021-02-21 09:30:00	337.938	17.4294	4.98	119.713	1.14	3.70875	416.924	1.2392	1.35	20.45	0.475681	562.847	92.9566	1.10346	76.7414	38	2.19426
2021-02-21 10:30:00	284.5	18.7892	4.98	120.497	1.14	3.7225	401.531	1.2392	1.35	20.45	0.442438	542.067	91.7503	27.3686	81.4548	38	2.28342
2021-02-21 11:30:00	370	18.8367	4.98	107.69	1.14	3.73625	405.988	1.2392	1.35	20.45	0.604024	548.084	97.1377	30.1614	68.0947	38	2.05033
2021-02-21 12:30:00	348.438	18.5112	5.84	152.932	1.14	3.75	410.445	1.2392	1.35	30.13	0.368763	554.101	95.45	27.8058	67.9496	38	1.95913
2021-02-21 13:30:00	354.75	20.756	5.84	159.794	1.14	3.7425	413.166	1.2392	1.35	30.13	0.430728	557.774	98.3093	29.8366	69.9087	38	1.90335
2021-02-21 14:30:00	372.125	18.8775	4.98	110.357	1.14	3.735	419.373	1.2392	1.35	30.13	0.370506	566.153	89.9698	1.10082	16.4948	38	2.35058
2021-02-21 15:30:00	366.312	18.8755	5.65	116.808	1.14	3.7275	420.478	1.2392	1.35	30.13	0.370366	567.646	91.6133	22.1685	78.3001	38	2.01985
2021-02-21 16:30:00	354.125	18.6463	6.56	119.998	1.14	3.72	419.603	1.2392	1.35	27.1456	0.406433	566.464	94.648	25.1752	77.0348	38	2.04303
2021-02-21 17:30:00	358.312	18.9557	5.46784	114.706	1.14	3.7125	418.728	1.2392	1.35	27.1644	0.407972	565.283	92.2345	26.8599	84.667	38	2.01762
2021-02-21 18:30:00	356.875	18.5777	5.44626	118.862	1.14	3.705	419.145	1.2392	1.35	27.1831	0.396797	565.845	92.0571	25.8463	70.3181	38	2.05897
2021-02-21 19:30:00	362.5	16.8521	5.42468	116.182	1.14	3.6975	419.561	1.2392	1.35	27.2019	0.355521	566.408	89.6668	23.2368	79.2041	38	2.02848
2021-02-21 20:30:00	348.5	18.318	5.81987	115.131	1.14	3.69	419.651	1.2392	1.35	27.2206	0.379362	566.529	91.6416	23.3082	77.8087	38	2.08618
2021-02-21 21:30:00	351.125	18.7369	5.7595	114.229	1.14	3.69	418.476	1.2392	1.35	27.2394	0.394193	564.942	92.2043	24.4144	63.2883	38	2.1295
2021-02-21 22:30:00	341.062	18.3455	5.69912	106.914	1.14	3.69	412.871	1.2392	1.35	27.2581	0.372622	557.375	90.4791	24.3953	72.6661	38	2.16389
2021-02-21 23:30:00	337	18.4546	5.98622	117.51	1.14	3.9825	407.686	1.2392	1.35	27.2769	0.376677	550.376	90.9261	22.9499	79.7092	38	2.11253
2021-02-22 00:30:00	342.125	16.4127	6.23093	116.493	1.14	3.9875	404.958	1.2392	1.35	27.28	0.334756	546.693	88.9102	23.6697	78.0298	38	2.10152
2021-02-22 01:30:00	339.812	18.8283	6.23493	114.013	1.14	3.9925	404.864	1.2392	1.35	27.28	0.394896	546.567	92.028	25.3753	85.08	38	2.08842
2021-02-22 02:30:00	348.562	18.3829	6.23893	120.2	1.14	3.9975	404.771	1.2392	1.35	27.28	0.399145	546.44	92.8585	22.3854	72.8735	38	2.08624
2021-02-22 03:30:00	351.25	16.7453	7.12	121.37	1.14	4.0025	405.493	1.2392	1.35	26.98	0.371744	547.416	93.3456	21.9182	80.7551	38	2.04596
2021-02-22 04:30:00	348	17.2676	6.23	116.673	1.14	4.0075	405.388	1.2392	1.35	26.98	0.36943	547.273	90.7752	23.6771	72.158	38	2.10073
2021-02-22 05:30:00	348.062	16.9655	4.96	118.329	1.14	4.0125	404.855	1.2392	1.35	26.98	0.349006	546.555	87.1536	23.7471	79.5391	38	2.06704
2021-02-22 06:30:00	350.688	17.5074	5.61	116.753	1.14	4.0175	405.087	1.2392	1.35	26.98	0.373425	546.868	89.74	24.9576	82.6967	38	2.04888
2021-02-22 07:30:00	347.75	16.9374	5.61	118.876	1.14	4.02	405.319	1.2392	1.35	26.98	0.354254	547.18	88.7918	22.8986	77.7778	38	2.07518
2021-02-22 08:30:00	341.312	16.9884	6.49	115.016	1.14	4.02	415.375	1.2392	1.35	26.98	0.341365	560.757	89.0699	25.3962	84.0195	38	2.08266
2021-02-22 09:30:00	352.875	17.3925	4.91778	120.119	1.14	4.02	408.357	1.2392	1.35	26.98	0.363	551.281	87.9709	19.1097	72.731	38	2.08336
2021-02-22 10:30:00	352.875	17.1305	4.93722	116.072	1.14	4.02	407.041	1.2392	1.35	26.98	0.355817	549.506	87.2669	23.5722	77.4607	38	2.06709
2021-02-22 11:30:00	346.188	17.3563	4.95667	113.876	1.14	4.02	406.333	1.2392	1.35	26.98	0.353072	548.55	86.9665	24.6697	84.0582	38	2.07238
2021-02-22 12:30:00	353.625	17.7742	4.97611	112.714	1.14	4.27	410.585	1.2392	1.35	27.45	0.354751	554.289	85.8754	24.5589	88.9342	38	2.03453
2021-02-22 13:30:00	357	16.8754	5.69805	109.484	1.14	4.27	409.742	1.2392	1.35	27.45	0.341111	553.152	85.9726	25.2652	56.1229	38	2.15161
2021-02-22 14:30:00	348.375	16.96	5.6828	109.2	1.14	4.27	407.373	1.2392	1.35	27.45	0.334767	549.953	85.5338	25.6269	69.6105	38	2.13305
2021-02-22 15:30:00	348.062	17.145	6.54	115.924	1.14	4.27	410.04	1.2392	1.35	27.45	0.34822	553.554	88.6668	26.4074	74.6925	38	2.08456
2021-02-22 16:30:00	349.438	17.8551	6.31327	116.076	1.14	3.91438	414.243	1.2392	1.35	28.88	0.349937	559.229	90.5823	22.7849	89.0436	38	2.04145
2021-02-22 17:30:00	347.5	17.5573	6.35691	110.233	1.14	3.90313	415.457	1.2392	1.35	28.88	0.336282	560.867	89.2787	25.3297	71.4971	38	2.12597
2021-02-22 18:30:00	350.312	16.8855	6.04	112.32	1.14	3.89188	420.868	1.2392	1.35	28.88	0.315361	568.172	87.4811	20.6277	82.0957	38	2.08541
2021-02-22 19:30:00	346.25	19.1641	4.76	120.416	1.14	3.88063	420.178	1.2392	1.35	28.88	0.358781	567.24	88.5759	26.7002	81.2279	38	2.04884
2021-02-22 20:30:00	351.25	19.2031	5.21	113.542	1.14	3.86937	411.932	1.2392	1.35	28.88	0.378734	556.108	90.1786	23.4679	79.8087	38	2.07511
2021-02-22 21:30:00	367	17.3505	5.21	121.718	1.14	3.85812	416.498	1.2392	1.35	28.88	0.349791	562.272	89.202	24.6236	80.8777	38	1.98245
2021-02-22 22:30:00	369.188	17.0586	4.51	121.206	1.14	3.84687	403.583	1.2392	1.35	28.88	0.35377	544.837	88.3884	23.2742	85.2913	38	1.96742
2021-02-22 23:30:00	358.125	16.1187	5.41532	116.684	1.14	3.83562	420.045	1.2392	1.35	25.34	0.354085	567.061	88.1413	24.996	87.0788	38	2.00887
2021-02-23 00:30:00	346.062	17.8595	5.82	119.831	1.14	3.83938	418.373	1.2392	1.35	25.34	0.39585	564.804	91.6666	23.927	82.8049	38	2.05597
2021-02-23 01:30:00	338.5	18.0874	5.31	124.409	1.14	3.85812	412.126	1.2392	1.35	25.34	0.395681	556.371	91.1132	24.9936	81.3622	38	2.0655
2021-02-23 02:30:00	339.688	17.5066	5.31	115.261	1.14	3.87687	413.079	1.2392	1.35	25.34	0.37451	557.656	88.9929	23.2451	83.0825	38	2.09866
2021-02-23 03:30:00	337.062	17.1755	6.78	113.55	1.14	3.89562	415.827	1.2392	1.35	29.37	0.313277	561.367	89.2192	24.6555	84.3545	38	2.10556
2021-02-23 04:30:00	338	17.3621	5.84513	117.229	1.14	3.91438	410.648	1.2392	1.35	29.37	0.317427	554.375	88.0708	17.7508	85.6246	38	2.1074
2021-02-23 05:30:00	362.875	17.8344	5.86051	121.084	1.14	3.93313	412.246	1.2392	1.35	29.37	0.359676	556.532	90.8424	23.4293	89.3792	38	1.9745
2021-02-23 06:30:00	366.312	19.0144	5.8759	121.302	1.14	3.95187	412.97	1.2392	1.35	29.37	0.393382	557.509	92.4774	23.4274	89.2457	38	1.96314
2021-02-23 07:30:00	357.875	17.661	4.98	114.65	1.14	3.97062	425.292	1.2392	1.35	29.37	0.321721	574.144	85.8335	24.6733	83.6692	38	2.03007
2021-02-23 08:30:00	353.625	17.6031	5.38	122.331	1.14	3.97375	417.065	1.2392	1.35	29.37	0.331337	563.038	88.0196	25.0148	85.685	38	2.007
2021-02-23 09:30:00	336.938	18.2605	6.75	113.219	1.14	3.96125	414.872	1.2392	1.35	29.37	0.337665	560.077	90.2767	23.6976	85.4818	38	2.10678
2021-02-23 10:30:00	350.75	18.5361	6.75	114.438	1.14	3.94875	417.895	1.2392	1.35	29.37	0.359403	564.159	91.5947	25.1308	82.3995	38	2.05828
2021-02-23 11:30:00	328.625	17.778	4.94	121.849	1.14	3.93625	426.357	1.2392	1.35	29.37	0.291195	575.582	84.2581	22.9094	80.1876	38	2.1236
2021-02-23 12:30:00	343.688	17.7654	5.58	124.505	1.14	3.92375	429.07	1.2392	1.35	27.51	0.338521	579.244	88.3484	22.8305	82.9858	38	2.04888
2021-02-23 13:30:00	352.375	17.8482	4.11	114.85	1.14	3.91125	425.713	1.2392	1.35	27.51	0.337662	574.712	84.8835	24.7605	83.9161	38	2.04701
2021-02-23 14:30:00	348.312	18.9355	5.84066	121.239	1.14	3.89875	433.391	1.2392	1.35	27.51	0.370747	585.078	90.4765	25.13	77.9435	36	2.05528
2021-02-23 15:30:00	351.688	19.2388	5.87508	114.224	1.14	3.88625	416.684	1.2392	1.35	27.51	0.402213	562.523	91.9924	25.535	87.6619	36	2.03628
2021-02-23 16:30:00	349.125	19.6305	4.37	111.279	1.14	3.88	418.368	1.2392	1.35	26.38	0.410487	564.797	89.2391	25.2991	87.9428	36	2.05658
2021-02-23 17:30:00	345.688	19.1386	4.96	118.324	1.14	3.88	413.52	1.2392	1.35	26.38	0.407542	558.252	90.716	24.4372	80.2721	36	2.07042
2021-02-23 18:30:00	340	19.4497	7.66	117.492	1.14	3.88	420.453	1.2392	1.35	26.38	0.425686	567.611	96.3882	22.2616	80.6373	36	2.10074
2021-02-23 19:30:00	336.562	19.7929	5.89	113.622	1.14	3.88	423.888	1.2392	1.35	26.38	0.404189	572.248	91.5941	24.6821	81.4433	36	2.11771
2021-02-23 20:30:00	345.938	19.864	4.8463	124.548	1.14	3.88	408.857	1.2392	1.35	26.38	0.436282	551.957	92.445	25.2331	79.4643	36	2.0448
2021-02-23 21:30:00	339.5	19.6527	4.76126	124.681	1.14	3.88	412.413	1.2392	1.35	26.38	0.414195	556.757	91.1764	25.2566	80.2617	36	2.06383
2021-02-23 22:30:00	337.812	20.1116	5.43	122.275	1.14	3.88	411.137	1.2392	1.35	26.38	0.432191	555.035	93.1426	25.3772	80.1926	36	2.07934
2021-02-23 23:30:00	339.312	19.3875	5.86	120.92	1.14	3.55	410.403	1.2392	1.35	27.85	0.402528	554.045	94.4158	25.2848	81.9019	36	2.07375
2021-02-24 00:30:00	338.438	11.46	6.42	114.447	1.14	3.55	410.433	1.2392	1.35	27.85	0.204178	554.084	81.2358	25.1642	76.2468	36	2.12476
2021-02-24 01:30:00	342.625	11.46	5.18	125.474	1.14	3.55	409.631	1.2392	1.35	27.85	0.201242	553.001	78.9344	0.684196	93.1243	36	2.09119
2021-02-24 02:30:00	338.25	11.46	6.59	127.714	1.14	3.55	409.703	1.2392	1.35	27.85	0.213709	553.099	84.9234	1.47288	119.817	36	2.00252
2021-02-24 03:30:00	337.625	11.46	5.39	121.43	1.14	4.14	409.775	1.2392	1.35	28.34	0.173678	553.196	70.3728	2.23673	118.043	36	2.03206
2021-02-24 04:30:00	341.25	11.46	6.42	120.293	1.14	4.14	370.851	1.2392	1.35	28.34	0.224373	500.649	81.4042	1.56643	118.422	36	2.02514
2021-02-24 05:30:00	340	11.46	5.23	116.874	1.14	4.14	417.163	1.2392	1.35	28.34	0.165951	563.17	67.976	1.16603	120.86	36	2.03573
2021-02-24 06:30:00	343.125	11.3427	4.75	118.342	1.14	4.14	409.262	1.2392	1.35	28.34	0.167938	552.504	67.5638	1.22766	125.829	36	2.00265
2021-02-24 07:30:00	343.25	11.3282	5.44239	117.595	1.14	4.14	410.41	1.2392	1.35	28.34	0.173345	554.054	69.9988	2.08974	122.367	36	2.01373
2021-02-24 08:30:00	332.25	11.3137	5.45787	120.497	1.14	4.14	409.401	1.2392	1.35	28.34	0.166022	552.691	69.1796	1.47204	126.07	36	2.02926
2021-02-24 09:30:00	346.875	11.2992	5.12	121.909	1.14	4.14	409.658	1.2392	1.35	28.34	0.174945	553.038	69.958	1.62587	127.07	36	1.97184
2021-02-24 10:30:00	341.875	11.7648	5.12	115.839	1.14	4.14	406.714	1.2392	1.35	28.34	0.182512	549.065	70.6092	1.70601	123.12	36	2.02384
2021-02-24 11:30:00	343.75	11.8172	6.15	113.465	1.14	4.14375	409.718	1.2392	1.35	28.34	0.191707	553.12	73.9771	1.66497	126.087	36	2.01679
2021-02-24 12:30:00	336.75	11.7963	6.70379	124.196	1.14	4.15125	413.183	1.2392	1.35	22.45	0.255314	557.796	80.4849	1.60879	125.943	36	2.00003
2021-02-24 13:30:00	339.875	11.7753	6.6831	122.315	1.14	4.15875	398.278	1.2392	1.35	22.45	0.27433	537.675	82.7404	1.64109	120.566	36	2.01454
2021-02-24 14:30:00	342	11.7543	5.46	118.945	1.14	4.16625	413.82	1.2392	1.35	22.45	0.238179	558.657	74.3088	1.1997	124.836	36	2.0075
2021-02-24 15:30:00	340.5	11.7334	7.18	114.805	1.14	4.17375	414.555	1.2392	1.35	22.45	0.254108	559.649	79.9115	0.810547	120.678	36	2.04395
2021-02-24 16:30:00	342.625	11.7124	6.52	118.147	1.14	4.18125	412.715	1.2392	1.35	23.66	0.236019	557.165	77.5318	1.33687	121.17	36	2.02026
2021-02-24 17:30:00	340.75	11.6915	7.12	124.238	1.14	4.18875	415.071	1.2392	1.35	23.66	0.242436	560.346	80.6796	0.849021	117.796	36	2.0162
2021-02-24 18:30:00	333.5	11.6705	5.37	112.568	1.14	4.19625	415.267	1.2392	1.35	23.66	0.204257	560.61	69.6094	0.920788	121.559	36	2.07389
2021-02-24 19:30:00	339.125	11.6691	5.37	121.302	1.14	4.2	414.634	1.2392	1.35	23.66	0.215637	559.755	72.1671	1.46872	124.257	36	2.00915
2021-02-24 20:30:00	335.75	11.6691	5.37	123.47	1.14	4.2	415.009	1.2392	1.35	23.66	0.212852	560.262	72.0161	1.06999	127.716	36	2.002
2021-02-24 21:30:00	339.5	11.6691	5.37	121.973	1.14	4.2	415.384	1.2392	1.35	23.66	0.215635	560.769	72.2171	1.19232	124.99	36	2.00385
2021-02-24 22:30:00	329	11.6691	4.52	120.866	1.14	4.2	419.756	1.2392	1.35	23.66	0.188795	566.67	65.9329	1.41546	127.158	36	2.03539
2021-02-24 23:30:00	333.25	11.6691	6.49	111.395	1.14	3.47	415.531	1.2392	1.35	31.32	0.177069	560.967	80.0007	1.52076	13.217	36	2.55126
2021-02-25 00:30:00	333.25	11.6691	6.27	110.06	1.14	3.47	423.663	1.2392	1.35	31.32	0.168926	571.946	77.8152	1.53634	0.346861	36	2.63089
2021-02-25 01:30:00	328.625	11.6691	4.98	121.771	1.14	3.47	422.628	1.2392	1.35	31.32	0.160247	570.547	74.6731	1.59326	2.81854	36	2.56814
2021-02-25 02:30:00	324	11.6691	6.06	107.49	1.14	3.47	413.813	1.2392	1.35	31.32	0.16614	558.647	76.8868	1.67327	19.1796	36	2.59267
2021-02-25 03:30:00	333.5	11.6691	4.18	112.857	1.14	4.57	411.026	1.2392	1.35	21.61	0.20027	554.885	61.708	1.664	109.774	36	2.11262
2021-02-25 04:30:00	329.25	11.6691	4.99	112.643	1.14	4.57	413.559	1.2392	1.35	21.61	0.203014	558.305	63.7514	1.72165	105.804	36	2.14404
2021-02-25 05:30:00	334	11.6691	4.99	116.716	1.14	4.57	415.615	1.2392	1.35	21.61	0.208904	561.08	64.9894	1.73414	125.265	36	2.03986
2021-02-25 06:30:00	326.625	11.6691	5.74	111.163	1.14	4.57	421.293	1.2392	1.35	21.61	0.200141	568.746	64.5392	1.87318	120.053	36	2.10645
2021-02-25 07:30:00	330.875	11.6691	6.32	108.425	1.14	4.57	417.325	1.2392	1.35	21.61	0.215362	563.389	67.9095	1.77975	119.517	36	2.10462
2021-02-25 08:30:00	328	11.6691	5.28	108.048	1.14	4.57	422.173	1.2392	1.35	21.61	0.192884	569.934	62.0675	1.70711	119.37	36	2.11758
2021-02-25 09:30:00	330.5	11.6691	4.45	108.151	1.14	4.57	417.806	1.2392	1.35	21.61	0.190156	564.039	60.0987	1.72509	120.557	36	2.10353
2021-02-25 10:30:00	328.125	11.6691	4.45	106.071	1.14	4.57	414.054	1.2392	1.35	21.61	0.190293	558.973	60.0331	1.80423	120.217	36	2.12197
2021-02-25 11:30:00	331	11.6691	5.02612	106.231	1.14	3.67	414.971	1.2392	1.35	20.04	0.26336	560.211	76.5479	1.86057	126.519	36	2.08755
2021-02-25 14:30:00	320.5	16.2347	7.49	114.564	1.14	3.67	420.546	1.2392	1.35	20.04	0.44092	567.737	96.4123	1.68479	122.809	36	2.10527
2021-02-25 15:30:00	330.5	17.6196	4.85	131.917	1.14	3.67	415.435	1.2392	1.35	20.04	0.489535	560.837	94.4824	1.56447	104.14	36	2.06582
2021-02-25 16:30:00	336.875	16.9583	6.10512	127.83	1.14	4.03	414.598	1.2392	1.35	16.97	0.600182	559.707	99.7871	1.60009	105.407	36	2.05525
2021-02-25 17:30:00	330.25	17.7339	6.03683	130.544	1.14	4.03	418.991	1.2392	1.35	16.97	0.611462	565.638	100.217	1.5269	110.455	36	2.05023
2021-02-25 18:30:00	330.375	16.1841	7.33	132.163	1.14	4.03	420.295	1.2392	1.35	16.97	0.567218	567.398	102.147	1.52145	121.27	36	2.00683
2021-02-25 19:30:00	348	16.3533	5.94	120.743	1.14	4.03	408.511	1.2392	1.35	16.97	0.600603	551.49	98.7693	1.50223	121.203	36	1.99192
2021-02-25 20:30:00	328.875	17.6472	4.73	125.418	1.14	4.03	407.954	1.2392	1.35	16.97	0.597839	550.738	96.2729	1.55482	120.166	36	2.04152
2021-02-25 22:30:00	334.625	16.4059	5.12	128.184	1.14	4.03	409.878	1.2392	1.35	16.97	0.559774	553.335	95.7468	1.62781	119.851	36	2.01216
2021-02-25 23:30:00	347	16.0448	6.52	132.64	1.14	3.39	414.141	1.2392	1.35	24.16	0.401136	559.09	97.321	1.62881	119.279	36	1.95729
2021-02-26 00:30:00	346.25	16.0448	6.52	133.854	1.14	3.39	414.069	1.2392	1.35	24.16	0.400975	558.993	97.4758	1.76654	122.219	36	1.94562
2021-02-26 01:30:00	346.75	16.0448	5.2	128.129	1.14	3.39	415.36	1.2392	1.35	24.16	0.379702	560.736	92.4585	1.87379	120.163	36	1.97086
2021-02-26 02:30:00	351.75	16.0448	5.2	123.062	1.14	3.39	415.09	1.2392	1.35	24.16	0.384367	560.371	92.2041	1.92455	125.524	36	1.95611
2021-02-26 03:30:00	351.125	16.0448	6.92	128.705	1.14	4.38	419.292	1.2392	1.35	24.61	0.36414	566.044	90.0396	1.91008	125.857	36	1.93695
2021-02-26 04:30:00	351.875	16.0448	5.73	133.417	1.14	4.38	418.55	1.2392	1.35	24.61	0.353639	565.043	87.1025	2.075	123.161	36	1.9259
2021-02-26 05:30:00	350.625	16.0448	4.44829	124.781	1.14	4.38	417.808	1.2392	1.35	24.61	0.331971	564.041	81.9117	2.04147	126.361	36	1.95048
2021-02-26 06:30:00	337.75	16.0448	4.53667	126.664	1.14	4.38	416.13	1.2392	1.35	24.61	0.317969	561.776	81.1205	2.08824	124.201	36	1.99164
2021-02-26 07:30:00	352.625	16.0448	5.42	124.067	1.14	4.38	415.371	1.2392	1.35	24.61	0.349815	560.751	85.3242	2.21078	124.783	36	1.95118
2021-02-26 08:30:00	353.25	16.0448	5.42	133.768	1.14	4.38	419.424	1.2392	1.35	24.61	0.350451	566.222	86.1606	2.17398	122.18	36	1.92317
2021-02-26 09:30:00	346.625	16.0448	5.89	124.751	1.14	4.38	424.253	1.2392	1.35	24.61	0.335783	572.742	85.1011	2.30836	122.732	36	1.97398
2021-02-26 10:30:00	346.125	16.0448	5.89	130.366	1.14	4.38	412.354	1.2392	1.35	24.61	0.354356	556.677	87.4154	2.25367	127.421	36	1.94068
2021-02-26 11:30:00	342.875	16.0448	6.61	123.488	1.14	4.38	408.241	1.2392	1.35	24.61	0.36038	551.125	88.8488	2.3087	124.974	36	1.9835
2021-02-26 12:30:00	347.5	18.5624	6.06	130.595	1.14	3.91	408.988	1.2392	1.35	29.14	0.372841	552.134	92.9968	2.25947	124.563	36	1.94446
2021-02-26 13:30:00	345.625	16.5021	6.92	130.243	1.14	3.91	410.353	1.2392	1.35	29.14	0.326609	553.976	92.441	2.16821	124.787	36	1.95117
2021-02-26 14:30:00	336.625	18.0067	6.3	131.876	1.14	3.91	407.913	1.2392	1.35	29.14	0.349472	550.683	92.5172	2.01261	118.99	36	1.99319
2021-02-26 15:30:00	341.75	17.8656	6.69	123.951	1.14	3.91	408.698	1.2392	1.35	29.14	0.351539	551.742	92.5707	1.78647	124.226	36	1.98958
2021-02-26 16:30:00	337.25	17.4918	6.16053	133.159	1.14	3.75	401.045	1.2392	1.35	27.66	0.371105	541.411	94.2082	1.72674	125.205	36	1.96724
2021-02-26 17:30:00	334.75	16.9724	6.08243	123.242	1.14	3.70781	404.91	1.2392	1.35	27.66	0.344405	546.628	91.6537	1.75582	123.196	36	2.01899
2021-02-26 18:30:00	338.25	17.1784	6.00432	128.419	1.14	3.73156	407.106	1.2392	1.35	27.66	0.352735	549.594	92.2828	1.54033	124.014	36	1.98588
2021-02-26 19:30:00	335.625	16.2937	5.55484	129.266	1.14	3.75531	409.303	1.2392	1.35	27.66	0.318888	552.559	89.1242	1.56258	125.322	36	1.98696
2021-02-26 20:30:00	335.125	16.9311	6.38	125.23	1.14	3.77906	407.199	1.2392	1.35	27.66	0.343351	549.718	92.0107	1.53255	124.332	36	2.0071
2021-02-26 21:30:00	347.125	16.2093	4.04	131.622	1.14	3.80281	407.65	1.2392	1.35	27.66	0.315331	550.327	85.308	1.58602	124.551	36	1.94412
2021-02-26 22:30:00	346.5	16.1971	4.04	134.496	1.14	3.82656	410.424	1.2392	1.35	27.66	0.311353	554.072	85.0217	1.51167	109.221	36	1.98473
2021-02-26 23:30:00	330.375	15.7791	5.49	131.916	1.14	3.85031	415.681	1.2392	1.35	21.8	0.384992	561.169	90.3468	1.69936	120.134	36	2.01096
2021-02-27 00:30:00	333.375	16.5404	6.00642	133.287	1.14	3.87406	410.792	1.2392	1.35	21.8	0.430369	554.569	94.3571	1.67748	118.918	36	1.99993
2021-02-27 01:30:00	331	16.255	7.48	124.523	1.14	3.88	415.545	1.2392	1.35	21.8	0.424318	560.985	96.4462	1.71739	119.951	36	2.03791
2021-02-27 02:30:00	344	15.8611	4.89	133.401	1.14	3.59	420.297	1.2392	1.35	24.44	0.351884	567.401	89.4334	1.83345	117.506	36	1.96906
2021-02-27 03:30:00	346.5	16.6574	6.13	133.256	1.14	3.59	403.609	1.2392	1.35	24.44	0.41784	544.872	96.4043	2.02769	117.992	36	1.95946
2021-02-27 04:30:00	322.625	16.0333	6.08909	133.636	1.14	3.59	411.903	1.2392	1.35	24.44	0.353983	556.069	93.0019	2.11598	120.369	36	2.02825
2021-02-27 05:30:00	345.125	16.2423	6.04818	130.52	1.14	3.59	406.812	1.2392	1.35	24.44	0.395953	549.196	94.8084	2.20917	125.294	36	1.95003
2021-02-27 06:30:00	343.875	16.0133	5.64473	132.842	1.14	3.59	415.664	1.2392	1.35	24.44	0.371532	561.147	92.5321	2.25929	124.703	36	1.94735
2021-02-27 07:30:00	330.625	18.2847	5.54655	132.345	1.14	3.59	419.031	1.2392	1.35	24.44	0.411319	565.691	94.0667	2.30491	114.253	36	2.02621
2021-02-27 08:30:00	333	16.3321	4.84	131.152	1.14	3.59	413.023	1.2392	1.35	24.44	0.357877	557.581	89.6719	2.27913	112.757	36	2.02793
2021-02-27 09:30:00	327.625	16.844	6.31	140.191	1.14	3.59	417.739	1.2392	1.35	24.44	0.382911	563.948	95.6348	2.27776	115.378	36	2.00263
2021-02-27 10:30:00	340.875	17.9247	6.31	130.935	1.14	3.59	414.438	1.2392	1.35	24.44	0.432336	559.492	96.7541	2.29399	118.271	36	1.98424
2021-02-27 11:30:00	340.875	17.2201	4.79	137.405	1.14	3.59	392.934	1.2392	1.35	24.44	0.426384	530.461	94.1728	2.31729	114.545	36	1.97238
2021-02-27 12:30:00	343.875	16.1032	5.74	140.659	1.14	4.76	407.334	1.2392	1.35	29.92	0.277573	549.901	82.473	2.27223	114.71	36	1.9507
2021-02-27 13:30:00	343.25	16.4976	4.44	142.075	1.14	4.76	409.196	1.2392	1.35	29.92	0.269983	552.415	78.8012	2.20469	114.97	36	1.94699
2021-02-27 14:30:00	330.875	16.7564	5.17	131.81	1.14	4.76	409.557	1.2392	1.35	29.92	0.26521	552.901	79.1323	2.02731	114.761	36	2.02665
2021-02-27 15:30:00	354.25	16.0092	4.72	130.894	1.14	4.76	405.564	1.2392	1.35	29.92	0.273635	547.511	79.0398	1.86876	116.305	36	1.94933
2021-02-27 16:30:00	349	16.5476	5.05	123.804	1.14	3.5	415.208	1.2392	1.35	26.9	0.345063	560.531	90.0928	1.75059	112.978	36	2.00341
2021-02-27 17:30:00	343.75	17.361	6.06	130.245	1.14	3.5	411.186	1.2392	1.35	26.9	0.379139	555.102	94.8649	1.68334	97.5654	36	2.04875
2021-02-27 18:30:00	353	16.2755	7.04	126.717	1.14	3.5	418.316	1.2392	1.35	26.9	0.362154	564.726	95.7574	1.55808	97.6203	36	2.03104
2021-02-27 19:30:00	341.625	16.2842	5.1	123.791	1.14	3.5	413.47	1.2392	1.35	26.9	0.331444	558.185	89.4591	1.5945	97.9057	36	2.08123
2021-02-27 20:30:00	334.375	15.7725	4.73509	118.305	1.14	3.5	419.116	1.2392	1.35	26.9	0.296999	565.806	85.7117	1.56504	95.1888	36	2.14099
2021-02-27 21:30:00	343.375	17.314	4.69037	123.448	1.14	3.5	418.859	1.2392	1.35	26.9	0.349626	565.46	89.4523	1.54743	91.0424	36	2.10126
2021-02-27 22:30:00	330.75	16.111	4.64565	114.831	1.14	3.5	418.603	1.2392	1.35	26.9	0.299384	565.114	85.4074	1.59237	81.6343	36	2.22394
2021-02-27 23:30:00	352.75	17.3988	4.26	120.943	1.14	4.06	405.354	1.2392	1.35	28.88	0.331539	547.228	85.3717	1.52852	106.373	36	2.02462
2021-02-28 00:30:00	353.5	16.3409	5.47	113.251	1.14	4.06	409.459	1.2392	1.35	28.88	0.308932	552.77	85.3767	1.658	100.192	36	2.07336
2021-02-28 01:30:00	347	17.6238	5.26	121.336	1.14	4.06	405.301	1.2392	1.35	28.88	0.340313	547.156	87.9341	1.73885	99.0954	36	2.06735
2021-02-28 02:30:00	348.375	16.3917	6.32	128.082	1.14	4.06	412.615	1.2392	1.35	28.88	0.316208	557.03	89.0793	1.88675	97.6897	36	2.04017
2021-02-28 03:30:00	339.5	16.6247	5.20034	121.149	1.14	4.06	403.409	1.2392	1.35	28.88	0.307111	544.602	85.581	1.82518	94.0636	36	2.11298
2021-02-28 04:30:00	145.625	16.9182	5.11898	-2.8427	1.14	3.12	355.82	1.2392	1.35	26.98	0.082749	480.357	43.529	2.0462	108.167	36	4.79731
2021-02-28 05:30:00	108	17.4647	4.89	120.378	1.14	3.12	99.7283	1.2392	1.35	26.98	0.665306	134.633	128.124	2.05048	106.707	36	3.42324
2021-02-28 06:30:00	379.375	17.0617	5.16	132.7	1.14	3.12	396.252	1.2392	1.35	26.98	0.43752	534.94	97.556	2.12639	112.451	36	1.87807
2021-02-28 07:30:00	347.5	15.5541	6.13	129.134	1.14	3.12	409.451	1.2392	1.35	26.98	0.34748	552.759	95.8756	2.09685	112.13	36	1.99
2021-02-28 08:30:00	347.25	16.1231	5.25702	126.778	1.14	3.12	394.159	1.2392	1.35	26.98	0.370057	532.115	94.8908	2.17068	108.063	36	2.0129
2021-02-28 09:30:00	346.125	16.4965	5.04	131.118	1.14	3.12	402.037	1.2392	1.35	26.98	0.368325	542.75	94.4602	2.18076	114.036	36	1.98064
2021-02-28 10:30:00	313.25	15.3121	5.04	128.338	1.14	3.12	407.101	1.2392	1.35	26.98	0.291248	549.587	90.0359	2.28036	119.818	36	2.08336
2021-02-28 11:30:00	341.5	16.2091	5.42	126.074	1.14	3.12	414.391	1.2392	1.35	26.98	0.342299	559.427	93.3343	2.12322	114.895	36	2.01213
2021-02-28 12:30:00	334.125	15.9434	4.62	126.866	1.14	4.11729	405.977	1.2392	1.35	28.69	0.277609	548.069	81.9425	2.25734	126.841	36	1.99356
2021-02-28 13:30:00	336	16.448	5.17058	123.813	1.14	4.12979	411.093	1.2392	1.35	28.69	0.290852	554.976	83.7962	2.13486	99.1197	36	2.09507
2021-02-28 14:30:00	330.375	16.2937	5.14014	126.285	1.14	4.14229	416.21	1.2392	1.35	28.69	0.27518	561.883	82.4075	2.06051	95.9492	36	2.11722
2021-02-28 15:30:00	359	16.354	4.67	120.615	1.14	4.15479	414.533	1.2392	1.35	28.69	0.305025	559.62	83.4143	1.86793	91.285	36	2.05509
2021-02-28 16:30:00	355.25	16.6084	5.42	120.577	1.14	4.16729	413.596	1.2392	1.35	23.68	0.396358	558.355	88.8215	1.7541	103.461	36	2.02666
2021-02-28 17:30:00	348.875	16.4995	5.42	121.885	1.14	4.17979	411.92	1.2392	1.35	23.68	0.385933	556.092	88.2875	1.61209	102.613	36	2.04677
2021-02-28 18:30:00	356.375	16.7667	4.96	124.754	1.14	4.19229	410.243	1.2392	1.35	23.68	0.403864	553.828	88.6413	1.5423	95.7034	36	2.03375
2021-02-28 19:30:00	353.75	16.6193	5.2	117.889	1.14	4.20479	408.567	1.2392	1.35	23.68	0.396459	551.565	88.0781	1.5276	85.037	36	2.10853
2021-02-28 20:30:00	343.875	16.0779	5.32	126.668	1.14	4.21	410.618	1.2392	1.35	23.68	0.367211	554.334	87.1843	1.47506	88.965	36	2.09392
2021-02-28 21:30:00	340.5	16.6318	5.32	122.8	1.14	4.21	409.324	1.2392	1.35	23.68	0.37936	552.588	87.6553	1.52278	95.998	36	2.09648
2021-02-28 22:30:00	343.5	16.2603	7.03	120.352	1.14	4.21	409.324	1.2392	1.35	23.68	0.392564	552.587	91.9682	1.49604	89.3847	36	2.12006
2021-02-28 23:30:00	336	16.0497	4.98	125.272	1.14	3.78	415.211	1.2392	1.35	28.48	0.28783	560.535	85.2064	1.65575	102.138	36	2.07996
2021-03-01 00:30:00	346.75	16.1145	5.74	121.44	1.14	3.78	423.698	1.2392	1.35	28.48	0.298711	571.992	87.0855	1.67258	101.779	36	2.05862
2021-03-01 01:30:00	343.875	16.1954	4.68	126.073	1.14	3.78	413.246	1.2392	1.35	28.48	0.299936	557.882	85.5694	1.78944	78.1535	36	2.13516
2021-03-01 02:30:00	346.75	16.1194	5.44	118.507	1.14	4.5	415.924	1.2392	1.35	27.84	0.289773	561.498	81.0421	1.89774	109.822	36	2.04154
2021-03-01 03:30:00	327.5	16.1092	6.34	126.323	1.14	4.5	418.603	1.2392	1.35	27.84	0.276409	565.114	82.4274	1.86129	114.368	36	2.06179
2021-03-01 04:30:00	330.75	16.2012	5.12638	117.898	1.14	4.5	417.062	1.2392	1.35	27.84	0.267395	563.034	78.2186	2.08778	114.388	36	2.08344
2021-03-01 05:30:00	329.562	16.2977	5.11086	120.185	1.14	4.5	410.011	1.2392	1.35	27.84	0.277153	553.514	79.5157	2.04127	116.279	36	2.07181
2021-03-01 06:30:00	328.375	15.8907	6.87793	120.497	1.14	4.5	412.948	1.2392	1.35	27.84	0.280846	557.48	83.5321	2.26829	120.365	36	2.05955
2021-03-01 07:30:00	336.25	16.5294	6.90591	114.574	1.14	4.5	412.775	1.2392	1.35	27.84	0.303888	557.247	84.8225	2.35223	118.387	36	2.06226
2021-03-01 08:30:00	329.875	17.1759	6.93389	120.217	1.14	4.5	406.804	1.2392	1.35	27.84	0.32336	549.186	87.2583	2.40243	119.041	36	2.05959
2021-03-01 09:30:00	327.125	16.7341	5.06	127.178	1.14	4.5	416.565	1.2392	1.35	27.84	0.280151	562.363	80.1237	2.46965	117.884	36	2.04535
2021-03-01 10:30:00	300.125	16.2304	5.06	114.205	1.14	4.5	412.961	1.2392	1.35	27.84	0.232186	557.498	73.9802	2.41682	119.744	36	2.19336
2021-03-01 11:30:00	335.125	16.1689	4.83	118.842	1.14	4.5	416.203	1.2392	1.35	27.84	0.270283	561.874	78.0261	2.42835	99.2959	36	2.1173
2021-03-01 12:30:00	360.875	16.6269	5.52	120.417	1.14	3.92	420.407	1.2392	1.35	29.65	0.310428	567.549	87.0606	2.41247	104.623	36	2.00234
2021-03-01 13:30:00	343.25	16.6269	6.68	141.173	1.14	3.92	415.853	1.2392	1.35	29.65	0.317175	561.402	92.5072	2.3389	90.5757	36	2.02945
2021-03-01 14:30:00	305.625	16.6269	4.72553	167.428	1.14	3.92	401.073	1.2392	1.35	29.65	0.277147	541.449	87.5573	2.14889	88.1792	36	2.06501
2021-03-01 15:30:00	321.375	16.6269	4.79382	169.26	1.14	3.92	422.523	1.2392	1.35	29.65	0.274756	570.406	86.9628	2.00864	108.119	36	1.94054
2021-03-01 16:30:00	370.75	16.6269	4.57	158.314	1.14	3.56	414.384	1.2392	1.35	28.96	0.35172	559.419	92.4359	1.92604	102.244	36	1.84894
2021-03-01 17:30:00	337.875	17.3153	5.98	109.13	1.14	3.56	417.18	1.2392	1.35	28.96	0.320822	563.193	89.4406	1.84026	108.174	36	2.11741
2021-03-01 18:30:00	350.625	17.6678	4.31	113.915	1.14	3.56	422.14	1.2392	1.35	28.96	0.326466	569.89	86.9767	1.77069	109.341	36	2.04833
2021-03-01 19:30:00	349.5	17.2748	4.91	118.049	1.14	3.56	419.604	1.2392	1.35	28.96	0.325384	566.466	88.4112	0.847786	104.246	36	2.05678
2021-03-01 20:30:00	338.625	17.5183	5.69325	121.662	1.14	3.56	415.8	1.2392	1.35	28.96	0.331287	561.33	90.7843	0.905506	102.285	36	2.08746
2021-03-01 21:30:00	338.875	18.8406	5.77618	128.34	1.14	3.56	411.462	1.2392	1.35	28.96	0.37226	555.473	93.7937	0.886119	117.512	36	2.00767
2021-03-01 22:30:00	327.25	17.1112	6.12	116.243	1.14	3.56	414.134	1.2392	1.35	28.96	0.311276	559.081	90.0032	0.854469	115.653	36	2.1028
2021-03-01 23:30:00	323.875	17.1134	5.14	121.81	1.14	4.32	414.988	1.2392	1.35	26.96	0.302448	560.233	82.4187	1.01505	111.444	36	2.10674
2021-03-02 00:30:00	323	17.2082	5.14	117.631	1.14	4.32	413.054	1.2392	1.35	26.96	0.304057	557.622	82.2389	1.0903	109.839	36	2.13333
2021-03-02 01:30:00	327	16.8727	4.68	115.006	1.14	4.32	413.591	1.2392	1.35	26.96	0.294194	558.348	80.2648	1.09989	107.371	36	2.13879
2021-03-02 02:30:00	328.75	17.1241	5.62	122.222	1.14	3.7	411.489	1.2392	1.35	29.46	0.304489	555.511	88.5161	1.32571	108.985	36	2.0951
2021-03-02 03:30:00	328.75	16.7155	5.39	120.076	1.14	3.7	403.633	1.2392	1.35	29.46	0.300418	544.904	87.7596	1.60178	115.791	36	2.07843
2021-03-02 04:30:00	328.188	17.0293	4.61	117.878	1.14	3.7	404.022	1.2392	1.35	29.46	0.298229	545.43	85.7439	1.54796	124.556	36	2.05851
2021-03-02 05:30:00	327.625	16.9292	5.42	112.827	1.14	3.7	410.99	1.2392	1.35	29.46	0.293206	554.836	86.4086	1.65652	111.452	36	2.12835
2021-03-02 06:30:00	329.375	17.3793	5.1249	115.731	1.14	3.7	413.536	1.2392	1.35	29.46	0.301426	558.273	86.6039	1.69167	114.468	36	2.09845
2021-03-02 07:30:00	328.625	17.6702	5.158	115.615	1.14	3.7	411.316	1.2392	1.35	29.46	0.309857	555.276	87.2894	1.81617	120.868	36	2.07815
2021-03-02 08:30:00	331.875	17.255	6.27	118.789	1.14	3.7	412.722	1.2392	1.35	29.46	0.314506	557.175	90.1493	1.87662	127.609	36	2.03055
2021-03-02 09:30:00	326.5	16.3386	6.81	112.535	1.14	3.7	406.457	1.2392	1.35	29.46	0.295576	548.717	89.5679	1.86657	115.436	36	2.11817
2021-03-02 10:30:00	331.25	16.2923	6.81	114.977	1.14	3.7	406.755	1.2392	1.35	29.46	0.300996	549.119	90.2242	1.95012	116.444	36	2.08671
2021-03-02 11:30:00	337.25	16.2459	5.67	129.442	1.14	3.7	409.596	1.2392	1.35	29.46	0.299752	552.954	89.1225	1.9544	117.386	36	2.00576
2021-03-02 12:30:00	329.125	16.1996	4.93	126.184	1.14	4.03	410.607	1.2392	1.35	27.02	0.298731	554.32	83.919	1.93332	99.8602	36	2.10831
2021-03-02 13:30:00	331.375	16.1533	5.99	134.372	1.14	4.03	409.676	1.2392	1.35	27.02	0.317858	553.062	88.7383	1.87503	108.824	36	2.03574
2021-03-02 14:30:00	328.5	16.5067	5.02	127.241	1.14	4.03	404.603	1.2392	1.35	27.02	0.314505	546.214	85.6013	1.7453	108.768	36	2.07474
2021-03-02 15:30:00	330.75	16.3646	5.70359	113.564	1.14	4.03	405.815	1.2392	1.35	27.02	0.313072	547.85	85.6221	1.65212	110.872	36	2.11579
2021-03-02 16:30:00	340.875	17.5051	5.70872	113.469	1.14	3.79333	406.303	1.2392	1.35	28.3544	0.343293	548.509	89.4764	1.52812	111.556	36	2.07742
2021-03-02 17:30:00	341.25	17.5051	5.46	117.341	1.14	3.81333	410.219	1.2392	1.35	28.3619	0.337788	553.796	88.816	1.53518	114.256	36	2.05106
2021-03-02 18:30:00	352.5	17.5051	5.02	115.636	1.14	3.83333	410.648	1.2392	1.35	28.3694	0.346063	554.375	88.2033	1.50631	113.018	36	2.02353
2021-03-02 19:30:00	342.375	17.5051	4.4	113.786	1.14	3.85333	409.781	1.2392	1.35	28.3769	0.326714	553.205	85.5759	1.46826	101.976	36	2.1055
2021-03-02 20:30:00	330.75	17.5051	5.53	115.577	1.14	3.87333	395.356	1.2392	1.35	28.3844	0.340239	533.731	89.027	1.42312	109.368	36	2.11371
2021-03-02 21:30:00	329.5	17.5051	5.53	110.98	1.14	3.89333	419.766	1.2392	1.35	28.3919	0.306944	566.684	85.6197	Not Connect	Not Connect	36	#VALUE!
2021-03-02 22:30:00	323.75	17.5051	4.97	109.595	1.14	3.91333	409.433	1.2392	1.35	28.3994	0.304795	552.735	84.4227	Not Connect	Not Connect	36	#VALUE!
2021-03-02 23:30:00	333.5	17.5051	5.35	122.07	1.14	3.93333	420.36	1.2392	1.35	28.4069	0.313236	567.486	86.4948	Not Connect	Not Connect	36	#VALUE!
2021-03-03 00:30:00	332.375	16.424	4.56	123.381	1.14	3.94667	415.656	1.2392	1.35	28.41	0.283064	561.136	82.6641	Not Connect	Not Connect	36	#VALUE!
2021-03-03 01:30:00	335	16.6485	4.42	122.352	1.14	3.92667	419.165	1.2392	1.35	28.41	0.286678	565.872	82.635	Not Connect	Not Connect	36	#VALUE!
2021-03-03 02:30:00	338.75	17.3985	4.42	117.384	1.14	3.90667	426.848	1.2392	1.35	28.41	0.299862	576.245	83.2929	Not Connect	Not Connect	36	#VALUE!
2021-03-03 03:30:00	350.125	16.1549	5.49241	119.576	1.14	3.88667	418.426	1.2392	1.35	28.67	0.300687	564.875	86.0929	Not Connect	Not Connect	36	#VALUE!
2021-03-03 04:30:00	345.5	16.6689	6.31	120.818	1.14	3.86667	421.289	1.2392	1.35	28.67	0.31397	568.741	88.8945	Not Connect	Not Connect	36	#VALUE!
2021-03-03 05:30:00	349	16.75	7.05	122.345	1.14	3.84667	422.788	1.2392	1.35	28.67	0.327033	570.764	91.5453	Not Connect	Not Connect	36	#VALUE!
2021-03-03 06:30:00	348.75	16.75	4.69	119.113	1.14	3.82667	423.76	1.2392	1.35	28.67	0.3018	572.076	84.7368	Not Connect	Not Connect	36	#VALUE!
2021-03-03 07:30:00	343.375	16.75	4.69	152.499	1.14	3.80667	415.616	1.2392	1.35	28.67	0.317628	561.082	88.8361	Error	Error	36	#VALUE!
2021-03-03 08:30:00	354.375	16.75	5.5704	131.649	1.14	3.79	425.521	1.2392	1.35	28.67	0.321472	574.453	89.1965	Error	Error	36	#VALUE!
2021-03-03 09:30:00	336.875	16.75	4.31	131.144	1.14	3.79	411.572	1.2392	1.35	28.67	0.302463	555.623	85.3877	Error	Error	36	#VALUE!
2021-03-03 10:30:00	306.625	16.75	4.31	132.952	1.14	3.79	398.468	1.2392	1.35	28.67	0.280225	537.932	84.147	Error	Error	36	#VALUE!
2021-03-03 11:30:00	353.625	16.75	5.22	135.78	1.14	3.79	416.418	1.2392	1.35	28.67	0.32893	562.164	89.5027	Error	Error	35.9862	#VALUE!
2021-03-03 12:30:00	325.125	16.75	5.66	119.186	1.14	3.38	407.574	1.2392	1.35	30.49	0.291965	550.224	89.942	Error	Error	35.9702	#VALUE!
2021-03-03 13:30:00	340.125	16.7956	5.26	118.803	1.14	3.38	398.73	1.2392	1.35	30.49	0.315604	538.285	90.6732	Error	Error	35.9541	#VALUE!
2021-03-03 14:30:00	347.375	17.7087	4.76	124.095	1.14	3.38	416.882	1.2392	1.35	30.49	0.322647	562.791	90.001	Error	Error	35.9381	#VALUE!
2021-03-03 15:30:00	351.5	16.9728	5.52305	123.317	1.14	3.38	401.286	1.2392	1.35	30.49	0.334411	541.736	92.5863	Error	Error	35.922	#VALUE!
2021-03-03 16:30:00	342.5	16.3933	5.46203	139.47	1.14	3.93031	388.873	1.2392	1.35	28.85	0.337847	524.979	91.134	Error	Error	35.906	#VALUE!
2021-03-03 17:30:00	337.5	17.002	5.24	153.548	1.14	3.93156	366.465	1.2392	1.35	28.85	0.382091	494.728	95.0396	Error	Error	35.8899	#VALUE!
2021-03-03 18:30:00	342.5	17.3877	4.93	122.024	1.14	3.93281	377.298	1.2392	1.35	28.85	0.36543	509.352	90.1707	Error	Error	36	#VALUE!
2021-03-03 19:30:00	354.875	16.8993	6.43	125.323	1.14	3.93406	407.647	1.2392	1.35	28.85	0.346473	550.323	91.7253	Error	Error	36	#VALUE!
2021-03-03 20:30:00	334.125	16.7874	4.43	112.399	1.14	3.93531	411.862	1.2392	1.35	28.85	0.287928	556.014	82.3423	Error	Error	36	#VALUE!
2021-03-03 21:30:00	337.125	17.8779	4.43	118.433	1.14	3.93656	410.922	1.2392	1.35	28.85	0.321362	554.745	85.3347	Error	Error	36	#VALUE!
2021-03-03 22:30:00	344	17.0114	6.12	114.254	1.14	3.93781	413.155	1.2392	1.35	28.85	0.320454	557.759	88.1168	Error	Error	36	#VALUE!
2021-03-03 23:30:00	338.5	16.7883	5.43138	113.494	1.14	3.93906	405.14	1.2392	1.35	26.42	0.344117	546.939	87.5006	Error	Error	36	#VALUE!
2021-03-04 00:30:00	341.375	17.239	5.38619	117.266	1.14	3.9425	403.543	1.2392	1.35	26.42	0.363992	544.782	89.0233	Error	Error	36	#VALUE!
2021-03-04 01:30:00	338	16.5187	5.341	110.81	1.14	3.9525	389.462	1.2392	1.35	26.42	0.353843	525.774	88.034	Error	Error	36	#VALUE!
2021-03-04 02:30:00	339.917	17.0363	5.29582	128.281	1.14	3.9625	405.969	1.2392	1.35	26.42	0.356979	548.058	89.2595	Error	Error	36	#VALUE!
2021-03-04 03:30:00	341.833	16.9222	5.98	124.064	1.14	3.9725	409.522	1.2392	1.35	28.48	0.327263	552.855	89.0794	Error	Error	36	#VALUE!
2021-03-04 04:30:00	343.75	16.0123	5.98	127.337	1.14	3.9825	413.83	1.2392	1.35	28.48	0.303039	558.671	87.5988	Error	Error	36	#VALUE!
2021-03-04 05:30:00	339.375	16.4611	4.69	125.812	1.14	3.9925	409.722	1.2392	1.35	28.48	0.299071	553.125	84.3331	Error	Error	36	#VALUE!
2021-03-04 06:30:00	328.375	16.4756	5.98	126.1	1.14	4.0025	397.342	1.2392	1.35	28.48	0.314001	536.411	88.6662	Error	Error	36	#VALUE!
2021-03-04 07:30:00	340.75	16.49	5.5	123.476	1.14	4.0125	408.683	1.2392	1.35	28.48	0.309601	551.722	86.5776	Error	Error	36	#VALUE!
2021-03-04 08:30:00	338.625	16.5045	5.17	123.07	1.14	4.01687	409.461	1.2392	1.35	28.48	0.302737	552.772	85.2767	Error	Error	36	#VALUE!
2021-03-04 09:30:00	337.625	16.5189	4.82552	127.129	1.14	4.00437	399.72	1.2392	1.35	28.48	0.311617	539.622	85.8685	Error	Error	36	#VALUE!
2021-03-04 10:30:00	336.625	16.5334	4.84916	126.782	1.14	3.99187	408.176	1.2392	1.35	28.48	0.301376	551.037	84.981	Error	Error	36	#VALUE!
2021-03-04 11:30:00	339.5	16.5478	4.87281	123.251	1.14	3.97938	415.884	1.2392	1.35	28.48	0.295764	561.444	84.1805	Error	Error	36	#VALUE!
2021-03-04 12:30:00	337.25	16.5623	4.89645	127.03	1.14	3.96688	409.232	1.2392	1.35	22.9627	0.390981	552.463	88.7995	21.2911	83.5406	36	2.06474
2021-03-04 13:30:00	338	16.567	5.23	122.788	1.14	3.95438	410.881	1.2392	1.35	22.954	0.392668	554.689	89.2838	19.2124	84.7237	36	2.08242
2021-03-04 14:30:00	312.875	16.5668	6.02	116.27	1.14	3.94187	408.967	1.2392	1.35	22.9452	0.362657	552.105	88.6342	20.5187	82.617	36	2.20904
2021-03-04 15:30:00	349.875	16.5666	6.23	118.289	1.14	3.92938	410.88	1.2392	1.35	22.9365	0.422722	554.689	92.7865	19.6267	80.3783	36	2.07239
2021-03-04 16:30:00	346.25	16.5664	6.69	125.232	1.14	3.92	377.855	1.2392	1.35	22.9277	0.483873	510.104	98.6584	12.056	81.0054	36	2.08184
2021-03-04 17:30:00	340	16.5662	6.69	148.548	1.14	3.92	396.133	1.2392	1.35	22.919	0.459542	534.78	99.9988	20.562	81.6424	36	1.98151
2021-03-04 18:30:00	358.5	16.566	6.21	129.178	1.14	3.92	416.469	1.2392	1.35	22.9102	0.435466	562.233	94.4483	16.412	83.8978	36	1.99941
2021-03-04 19:30:00	356.75	16.5657	5.92585	122.395	1.14	3.92	413.838	1.2392	1.35	22.9015	0.428742	558.682	92.8214	20.2817	94.8409	36	1.98198
2021-03-04 20:30:00	348.25	17.4255	6.37	126.777	1.14	3.92	412.011	1.2392	1.35	22.9	0.455501	556.215	95.6072	27.4141	58.8606	36	2.09272
2021-03-04 21:30:00	340.25	17.2693	6.37	132.791	1.14	3.92	420.272	1.2392	1.35	22.9	0.428662	567.367	94.7855	14.9811	85.3265	36	2.04715
2021-03-04 22:30:00	351.25	17.1862	4.89804	125.49	1.14	3.92	410.989	1.2392	1.35	22.9	0.433245	554.835	91.1878	22.5636	72.7461	36	2.05521
2021-03-04 23:30:00	343.875	16.2587	5.86	123.415	1.14	3.65	410.732	1.2392	1.35	29.28	0.309012	554.489	89.7331	22.7161	97.8618	36	2.00247
2021-03-05 00:30:00	353	16.3527	5.86	127.035	1.14	3.66	414.445	1.2392	1.35	29.28	0.319049	559.501	90.545	20.2663	101.675	36	1.95525
2021-03-05 01:30:00	348.625	16.6371	6.12	129.175	1.14	3.67	418.158	1.2392	1.35	29.28	0.320227	564.513	91.257	18.5678	89.9521	36	2.00493
2021-03-05 02:30:00	349	16.324	5.86	124.692	1.14	3.68	407.773	1.2392	1.35	29.28	0.319618	550.493	90.4277	16.9671	90.8279	36	2.02321
2021-03-05 03:30:00	348.375	16.5849	6.28	124.843	1.14	3.69	413.988	1.2392	1.35	31.94	0.29194	558.883	90.1962	21.3716	88.691	36	2.0171
2021-03-05 04:30:00	351.125	17.5621	6.72	127.305	1.14	3.7	419.62	1.2392	1.35	31.94	0.315407	566.486	92.546	20.7062	85.9139	36	2.01003
2021-03-05 05:30:00	349.875	16.6558	5.82	123.184	1.14	3.71	419.223	1.2392	1.35	31.94	0.284479	565.951	88.2442	20.82	87.6074	36	2.02393
2021-03-05 06:30:00	339	16.4196	6.62	129.982	1.14	3.72	418.827	1.2392	1.35	31.94	0.278505	565.416	90.3596	20.4582	86.1057	36	2.04093
2021-03-05 07:30:00	333.25	16.9429	4.65	123.37	1.14	3.73	420.532	1.2392	1.35	31.94	0.261163	567.719	83.873	19.493	73.8682	36	2.13624
2021-03-05 08:30:00	335.75	16.7662	6.63	130.617	1.14	3.73	415.351	1.2392	1.35	31.94	0.286065	560.724	91.0118	25.9526	83.5216	36	2.03961
2021-03-05 09:30:00	355.25	16.4207	5.66	135.034	1.14	3.73	407.09	1.2392	1.35	31.94	0.300247	549.572	90.3466	20.3329	87.5981	36	1.96362
2021-03-05 10:30:00	335.125	16.4092	5.66	130.842	1.14	3.73	422.807	1.2392	1.35	31.94	0.261728	570.79	86.7694	19.3112	88.6378	36	2.04614
2021-03-05 11:30:00	316.25	16.3978	4.59	103.327	1.14	3.73	408.251	1.2392	1.35	31.94	0.236095	551.139	80.1433	20.3683	80.1254	36	2.26699
2021-03-05 12:30:00	321.625	16.3863	4.34	101.24	1.14	4.07385	423.961	1.2392	1.35	27.6	0.255436	572.347	76.5632	19.5386	76.6916	36	2.27238
2021-03-05 13:30:00	324	16.7214	4.95	137.25	1.14	4.0976	426.006	1.2392	1.35	27.6	0.283778	575.109	83.142	19.068	76.1221	36	2.10506
2021-03-05 14:30:00	305.25	16.5013	5.74	142.712	1.14	4.12135	341.209	1.2392	1.35	27.6	0.376554	460.633	95.0423	18.6573	81.7863	36	2.13199
2021-03-05 15:30:00	302.25	16.6283	5.74	127.636	1.14	4.1451	407.491	1.2392	1.35	27.6	0.277523	550.113	83.8388	19.714	84.8385	35.9739	2.19405
2021-03-05 16:30:00	359.125	16.1837	5.89	143.137	1.14	4.16885	410.56	1.2392	1.35	28.8	0.326874	554.256	89.7759	19.9882	86.6954	35.9773	1.92658
2021-03-05 17:30:00	387.375	18.7651	4.82	145.61	1.14	4.1926	425.895	1.2392	1.35	28.8	0.399956	574.958	91.1083	21.4315	72.808	35.9807	1.87117
2021-03-05 18:30:00	387.375	16.221	4.82	135.821	1.14	4.21635	424.61	1.2392	1.35	28.8	0.327351	573.223	86.0045	19.4528	78.2938	35.9841	1.89355
2021-03-05 19:30:00	303.625	16.2995	5.58	145.208	1.14	4.2401	426.886	1.2392	1.35	28.8	0.242273	576.296	81.2515	21.0296	79.901	35.9875	2.1256
2021-03-05 20:30:00	345	16.6146	6.11	147.617	1.14	4.25	435.274	1.2392	1.35	28.8	0.295497	587.62	87.2436	18.7264	75.6724	35.9909	1.99412
2021-03-05 21:30:00	293.25	16.8846	6.11	152.016	1.14	4.25	412.868	1.2392	1.35	28.8	0.26612	557.371	86.2749	18.7548	89.8891	35.9943	2.10676
2021-03-05 22:30:00	318.25	16.348	6.33	129.209	1.14	3.21	411.135	1.2392	1.35	21.86	0.420573	555.032	98.079	18.2445	83.2486	35.9977	2.13704
2021-03-05 23:30:00	358	16.9233	5.74	118.373	1.14	3.21	412.85	1.2392	1.35	21.86	0.485259	557.348	97.5848	20.2093	87.9145	36	2.01606
2021-03-06 00:30:00	320.125	16.777	5.74	119.356	1.14	3.21	415.185	1.2392	1.35	21.86	0.41638	560.5	94.9908	20.1305	83.1716	36	2.16587
2021-03-06 01:30:00	367	17.1033	6.31826	130.685	1.14	3.21	414.561	1.2392	1.35	21.86	0.51944	559.657	101.242	19.972	83.8905	36	1.955
2021-03-06 02:30:00	349.75	16.8758	6.21391	134.394	1.14	3.21	415.109	1.2392	1.35	21.86	0.483711	560.397	100.395	20.6506	84.8055	36	1.99172
2021-03-06 03:30:00	311.5	16.385	6.35878	125.294	1.14	3.82	414.499	1.2392	1.35	20.37	0.418381	559.574	93.4365	20.4429	82.9279	36	2.17281
2021-03-06 04:30:00	346.875	16.3414	6.28531	124.167	1.14	3.82	415.137	1.2392	1.35	20.37	0.476241	560.435	95.914	20.8523	87.5904	36	2.03025
2021-03-06 05:30:00	368.125	17.0515	5.06	119.726	1.14	3.82	414.847	1.2392	1.35	20.37	0.52093	560.043	94.6747	20.6396	89.0886	36	1.9725
2021-03-06 06:30:00	364.375	16.9801	4.66	128.884	1.14	3.82	411.63	1.2392	1.35	20.37	0.516375	555.701	94.4733	20.7685	83.0641	36	1.96996
2021-03-06 07:30:00	358.75	17.279	6.32	119.868	1.14	3.82	416.292	1.2392	1.35	20.37	0.528508	561.995	97.6031	20.2708	81.0651	36	2.0307
2021-03-06 08:30:00	357.188	16.1372	6.32	119.75	1.14	3.82	416.953	1.2392	1.35	20.37	0.480535	562.886	95.59	20.2638	83.2807	36	2.02896
2021-03-06 09:30:00	355.625	16.5868	5.61	128.192	1.14	3.82	412.015	1.2392	1.35	20.37	0.499027	556.221	95.8532	18.2473	86.5346	36	1.99785
2021-03-06 10:30:00	352.5	16.2664	5.61	121.105	1.14	3.82	409.525	1.2392	1.35	20.37	0.480502	552.858	94.3734	18.7948	87.0272	36	2.0319
2021-03-06 11:30:00	334	16.6974	4.17	122.317	1.14	3.82	398.024	1.2392	1.35	20.37	0.461697	537.332	90.614	19.7803	79.2835	36	2.11664
2021-03-06 12:30:00	357.625	16.5429	4.6	119.921	1.14	4.6	413.319	1.2392	1.35	25.62	0.339192	557.981	81.9606	19.8504	87.4934	36	2.01402
2021-03-06 13:30:00	359.25	16.9659	5.53	126.462	1.14	4.6	402.088	1.2392	1.35	25.62	0.385211	542.819	87.894	19.1788	88.8749	36	1.98176
2021-03-06 14:30:00	332.125	16.5958	4.26	128.415	1.14	4.6	401.828	1.2392	1.35	25.62	0.319238	542.468	80.4947	19.9509	90.6573	36	2.05693
2021-03-06 15:30:00	266.625	17.139	5.23	121.85	1.14	4.6	415.647	1.2392	1.35	25.62	0.230186	561.124	72.4153	18.4276	78.8126	36	2.41021
2021-03-06 16:30:00	170.25	17.3361	5.7	142.384	1.14	3.75	255.414	1.2392	1.35	28.28	0.305462	344.809	100.92	18.3327	71.5913	36	2.8682
2021-03-06 17:30:00	383.625	16.1623	5.49	131.87	1.14	3.75	403.035	1.2392	1.35	28.28	0.373517	544.097	92.6949	18.9971	84.7307	36	1.9003
2021-03-06 18:30:00	326.25	16.8047	6.22	138.15	1.14	3.75	413.741	1.2392	1.35	28.28	0.318771	558.55	91.8417	20.0128	79.2358	36	2.07858
2021-03-06 19:30:00	362	16.429	5.8	126.206	1.14	3.75	405.693	1.2392	1.35	28.28	0.351918	547.686	91.6504	19.2297	78.1833	36	2.00864
2021-03-06 20:30:00	355.125	16.0496	4.43	125.746	1.14	3.75	410.602	1.2392	1.35	28.28	0.313002	554.313	86.0867	17.8902	77.7845	36	2.03954
2021-03-06 21:30:00	363.375	17.5001	4.43	132.566	1.14	3.75	414.615	1.2392	1.35	28.28	0.359034	559.73	89.3712	20.7027	78.78	36	1.97366
2021-03-06 22:30:00	344.375	15.5892	5.37	124.4	1.14	3.75	415.157	1.2392	1.35	28.28	0.293011	560.462	86.5074	20.1276	74.4889	36	2.08639
2021-03-06 23:30:00	355.25	16.4703	6.25	108.242	1.14	4.19167	415.11	1.2392	1.35	27.64	0.325203	560.398	86.0901	18.0737	62.8251	36	2.16567
2021-03-07 00:30:00	359	17.1886	5.18	93.4798	1.14	4.18167	415.063	1.2392	1.35	27.64	0.333189	560.335	83.6257	21.6607	75.1472	36	2.15477
2021-03-07 01:30:00	350.875	15.6838	4.16	93.4903	1.14	4.17167	415.016	1.2392	1.35	27.64	0.274489	560.271	77.2428	17.9716	89.4876	36	2.14509
2021-03-07 02:30:00	349.5	17.4158	4.16	97.3301	1.14	4.16167	415.904	1.2392	1.35	27.64	0.319498	561.471	81.4596	21.0007	89.2533	36	2.1233
2021-03-07 03:30:00	352	16.8447	5.97	94.4749	1.14	4.15167	415.067	1.2392	1.35	29.44	0.299644	560.34	83.3659	18.7979	87.1395	36	2.14234
2021-03-07 04:30:00	340.75	17.5523	5.72	103.731	1.14	4.14167	415.163	1.2392	1.35	29.44	0.305812	560.469	84.3672	18.0334	84.8762	36	2.15655
2021-03-07 05:30:00	345	17.9425	6.06	96.3337	1.14	4.13167	414.826	1.2392	1.35	29.44	0.320458	560.016	85.3508	20.2974	74.6315	36	2.20426
2021-03-07 06:30:00	340.375	16.9719	5.82	99.0654	1.14	4.12167	414.913	1.2392	1.35	29.44	0.290899	560.132	83.039	18.5275	84.044	36	2.17994
2021-03-07 07:30:00	350.125	16.9036	5.49313	96.7783	1.14	4.12	419.53	1.2392	1.35	29.44	0.292251	566.366	82.3357	20.9821	85.6044	36	2.13705
2021-03-07 08:30:00	345.625	16.5329	5.1	99.0634	1.14	4.12	418.839	1.2392	1.35	29.44	0.276638	565.433	80.589	20.9765	85.7626	36	2.14364
2021-03-07 09:30:00	340.625	16.834	6.31	108.234	1.14	4.12	413.89	1.2392	1.35	29.44	0.29762	558.752	85.3795	18.1243	75.7916	36	2.17195
2021-03-07 10:30:00	350.625	16.5017	6.31	117.239	1.14	4.12	416.039	1.2392	1.35	29.44	0.303441	561.653	86.7178	18.8926	80.2619	36	2.077
2021-03-07 11:30:00	352.5	16.7466	4.82	113.46	1.14	4.12	414.392	1.2392	1.35	29.44	0.298047	559.429	83.1539	17.9699	73.4865	36	2.11371
2021-03-07 12:30:00	348.25	17.3383	5.06	117.326	1.14	4.03	413.825	1.2392	1.35	29.92	0.308593	558.664	85.4281	20.0698	83.4581	36	2.06956
2021-03-07 13:30:00	349.25	16.0898	5.06	120.533	1.14	3.91	389.413	1.2392	1.35	29.92	0.311483	525.707	87.1876	18.8548	78.2723	36	2.07575
2021-03-07 14:30:00	342.5	16.995	5.43	114.03	1.14	3.90375	405.401	1.2392	1.35	29.92	0.308331	547.291	86.7394	18.2426	83.003	36	2.11209
2021-03-07 15:30:00	351	18.0939	4.16	118.08	1.14	3.8975	415.272	1.2392	1.35	29.92	0.323946	560.617	85.5581	22.3344	85.7061	36	2.04125
2021-03-07 16:30:00	339.5	16.7598	5.07647	111.122	1.14	3.89125	423.135	1.2392	1.35	23.75	0.362327	571.232	86.391	18.1504	83.4325	36	2.13433
2021-03-07 17:30:00	338.625	17.9891	5.07059	111.782	1.14	3.885	424.724	1.2392	1.35	23.75	0.395969	573.378	88.519	19.3234	73.8297	36	2.16697
2021-03-07 18:30:00	325.875	16.9436	4.89	111.031	1.14	3.87875	426.314	1.2392	1.35	23.75	0.341728	575.523	84.5963	19.3883	78.1485	36	2.2033
2021-03-07 19:30:00	341.875	16.6444	5.29	113.014	1.14	3.8725	410.683	1.2392	1.35	23.75	0.383362	554.422	88.711	17.9257	86.6129	36	2.10655
2021-03-07 20:30:00	350.625	16.5952	5.97	121.735	1.14	3.86625	423.681	1.2392	1.35	23.75	0.390035	571.969	91.0571	17.6484	76.4337	36	2.07682
2021-03-07 21:30:00	350	16.9151	5.97	114.302	1.14	3.86	417.178	1.2392	1.35	23.75	0.403888	563.19	91.2508	18.0976	85.5759	36	2.07506
2021-03-07 22:30:00	354.875	15.1888	5.37	123.217	1.14	3.86	411.839	1.2392	1.35	23.75	0.361563	555.983	88.5747	19.9291	75.4436	36	2.05139
2021-03-07 23:30:00	349.625	17.023	6.47	119.116	1.14	4.27	399.021	1.2392	1.35	28.36	0.349093	538.679	89.6061	17.8446	66.8727	36	2.12545
2021-03-08 00:30:00	353.875	16.1963	5.13257	120.066	1.14	4.27	408.65	1.2392	1.35	28.36	0.306873	551.678	83.7694	0.871848	0.198652	36	2.46388
2021-03-08 01:30:00	350.125	16.2898	5.17504	118.618	1.14	4.27	408.41	1.2392	1.35	28.36	0.304845	551.354	83.575	1.08149	0.21389	36	2.49009
2021-03-08 02:30:00	347.875	16.492	6.41	135.078	1.14	4.27	411.393	1.2392	1.35	28.36	0.32534	555.38	89.3176	20.8047	90.2808	36	1.97698
2021-03-08 03:30:00	345.625	16.4849	4.62	123.422	1.14	3.81	414.375	1.2392	1.35	27.95	0.312224	559.406	85.6809	21.5434	81.8738	36	2.05477
2021-03-08 04:30:00	349.875	17.2786	6.49	115.588	1.14	3.81	406.686	1.2392	1.35	27.95	0.362829	549.026	92.0991	19.4911	76.2034	36	2.09892
2021-03-08 05:30:00	353.375	16.4622	5.53	120.778	1.14	3.81	397.301	1.2392	1.35	27.95	0.350274	536.356	90.265	18.9598	69.3843	36	2.09143
2021-03-08 06:30:00	349.812	15.0749	4.54	129.27	1.14	3.81	409.792	1.2392	1.35	27.95	0.28714	553.22	84.1943	21.5101	79.7577	36	2.02489
2021-03-08 07:30:00	346.25	16.0379	4.89	123.626	1.14	3.81	390.985	1.2392	1.35	27.95	0.332077	527.829	88.2219	20.2913	78.0217	36	2.06968
2021-03-08 08:30:00	348.625	15.288	5.19	122.912	1.14	3.81	323.395	1.2392	1.35	27.95	0.416886	436.583	95.446	19.967	81.0186	36	2.05482
2021-03-08 09:30:00	337.875	16.0818	5.18071	158.823	1.14	3.81	392.915	1.2392	1.35	27.95	0.339773	530.435	92.7069	20.8576	76.9971	36	1.96468
2021-03-08 10:30:00	328.625	17.1697	5.19143	127.571	1.14	3.81	414.752	1.2392	1.35	27.95	0.315478	559.915	87.5003	20.9079	83.253	36	2.09574
2021-03-08 11:30:00	346.5	16.5391	5.20214	121.552	1.14	3.81	416.555	1.2392	1.35	27.95	0.317427	562.349	87.0596	20.3784	82.6258	36	2.06061
2021-03-08 12:30:00	348.25	17.2511	5.42	132.812	1.14	4.21583	419.296	1.2392	1.35	20.59	0.479248	566.049	92.9742	20.2618	76.5914	36	2.03147
2021-03-08 13:30:00	338.125	17.212	6.84	127.766	1.14	4.20958	417.358	1.2392	1.35	20.59	0.481537	563.434	95.9889	22.4476	87.2	36	2.04203
2021-03-08 14:30:00	339	15.1852	5.34	131.528	1.14	4.20333	415.421	1.2392	1.35	20.59	0.390772	560.818	87.656	23.1305	79.3187	36	2.04905
2021-03-08 15:30:00	335.625	17.7342	5.34	125.828	1.14	4.19708	417.715	1.2392	1.35	20.59	0.470697	563.916	91.8219	19.1493	81.2034	36	2.09138
2021-03-08 16:30:00	349	17.8577	5.49	131.43	1.14	4.19083	414.342	1.2392	1.35	26.87	0.371336	559.361	89.5522	21.0769	81.3965	36	2.01527
2021-03-08 17:30:00	353	17.9951	5.07	126.797	1.14	4.18458	417.359	1.2392	1.35	26.87	0.369855	563.435	88.1483	20.8319	83.4883	36	2.01338
2021-03-08 18:30:00	359.625	16.015	5.46	127.465	1.14	4.17833	396.817	1.2392	1.35	26.87	0.354923	535.703	88.7052	20.1053	80.6139	36	2.00079
2021-03-08 19:30:00	353.5	16.6205	5.46	130.484	1.14	4.17208	414.567	1.2392	1.35	26.87	0.342634	559.666	87.6987	0.869419	0.156325	36	2.4078
2021-03-08 20:30:00	346.375	16.9492	6.51	124.689	1.14	4.155	399.205	1.2392	1.35	26.87	0.372242	538.927	91.8182	20.6424	52.8868	36	2.15602
2021-03-08 21:30:00	344.25	16.9498	6.51	134.095	1.14	4.1325	385.888	1.2392	1.35	26.87	0.394874	520.948	94.7291	20.62	78.5776	36	2.03213
2021-03-08 22:30:00	370.5	19.1598	4.52	133.375	1.14	4.11	409.33	1.2392	1.35	26.87	0.438479	552.596	91.716	22.503	83.6817	36	1.92736
2021-03-08 23:30:00	356	17.1676	5.1	128.781	1.14	4.0875	408.51	1.2392	1.35	22.58	0.451657	551.489	92.0259	19.9057	63.081	36	2.06862
2021-03-09 00:30:00	361.625	16.6647	4.96	140.111	1.14	4.065	416.913	1.2392	1.35	22.58	0.434772	562.833	91.6874	20.4251	84.5172	36	1.93486
2021-03-09 01:30:00	346.375	14.6157	5.91	125.524	1.14	4.0425	422.561	1.2392	1.35	22.58	0.340633	570.458	86.6698	20.6999	77.1081	36	2.06339
2021-03-09 02:30:00	339.875	16.474	5.36	129.029	1.14	4.02	421.858	1.2392	1.35	26.92	0.314229	569.508	86.0406	22.5344	94.167	36	2.00737
2021-03-09 03:30:00	365.75	16.6827	6.81	127.034	1.14	3.9975	411.126	1.2392	1.35	26.92	0.382727	555.02	93.7177	21.8643	86.9257	36	1.95652
2021-03-09 04:30:00	349.625	15.4349	6.81	123.332	1.14	3.99833	349.379	1.2392	1.35	26.92	0.413277	471.662	97.2389	20.448	81.1173	36	2.04767
2021-03-09 05:30:00	348	17.2942	5.15	132.752	1.14	4.01083	422.317	1.2392	1.35	26.92	0.345381	570.128	88.0778	20.2626	80.7731	36	2.01839
2021-03-09 06:30:00	352.125	15.058	4.68	125.616	1.14	4.02333	415.791	1.2392	1.35	26.92	0.288984	561.318	82.3557	20.5776	82.3525	36	2.02553
2021-03-09 07:30:00	338	17.0051	5.37	129.424	1.14	4.03583	397.893	1.2392	1.35	26.92	0.355681	537.156	89.4829	19.6931	80.666	36	2.06824
2021-03-09 08:30:00	355.5	17.0119	5.97	124.621	1.14	4.04833	407.122	1.2392	1.35	26.92	0.37157	549.615	90.9036	19.1719	82.5378	36	2.02208
2021-03-09 09:30:00	346	15.3248	5.13	125.132	1.14	4.06083	423.808	1.2392	1.35	26.92	0.283731	572.14	82.4162	20.8109	93.3633	36	2.01019
2021-03-09 10:30:00	329.625	15.9513	5.13	122.831	1.14	4.07333	420.479	1.2392	1.35	26.92	0.282529	567.646	82.1108	22.6862	95.7558	36	2.06054
2021-03-09 11:30:00	371.875	16.7481	4.18	115.831	1.14	4.08583	400.584	1.2392	1.35	26.92	0.370134	540.789	86.5165	19.2604	76.2997	36	2.02139
2021-03-09 12:30:00	337.125	17.1144	5.2	120.146	1.14	4.09	408.38	1.2392	1.35	18.85	0.51946	551.313	93.5641	19.347	80.9339	36	2.10976
2021-03-09 13:30:00	340.625	17.4616	6.17	119.149	1.14	4.09	399.451	1.2392	1.35	18.85	0.575461	539.259	98.3476	20.2516	66.9871	36	2.14973
2021-03-09 14:30:00	378.625	17.1558	4.84	121.186	1.14	4.09	407.461	1.2392	1.35	18.85	0.605302	550.072	96.6234	20.5425	79.269	36	1.96531
2021-03-09 15:30:00	332.125	15.8313	5.66	123.6	1.14	4.09	419.781	1.2392	1.35	18.85	0.446847	566.705	90.7837	26.3411	84.5635	36	2.07522
2021-03-09 16:30:00	328	15.7368	5.23	138.369	1.14	3.77083	421.006	1.2392	1.35	24.8728	0.320463	568.357	87.7677	23.0776	78.738	36	2.06243
2021-03-09 17:30:00	369.875	14.7257	5.23	127.829	1.14	3.79583	404.362	1.2392	1.35	24.8541	0.359856	545.888	89.6395	23.2066	77.3267	36	1.96677
2021-03-09 18:30:00	347.25	18.1319	4.76	133.073	1.14	3.82083	429.75	1.2392	1.35	24.8353	0.393846	580.163	90.1282	25.9455	86.7422	36	1.98121
2021-03-09 19:30:00	373.125	17.6968	7.35	134.468	1.14	3.84583	402.459	1.2392	1.35	24.8166	0.495035	543.319	101.084	27.6085	83.801	36	1.89987
2021-03-09 20:30:00	348.25	17.5062	6.25778	133.227	1.14	3.87083	422.099	1.2392	1.35	24.7978	0.405975	569.834	94.0977	38.2399	82.2692	36	1.95249
2021-03-09 21:30:00	306.5	16.1397	6.2837	137.642	1.14	3.89583	410.763	1.2392	1.35	24.7791	0.325762	554.53	90.4867	25.5158	68.6312	36	2.17338
2021-03-09 22:30:00	361	16.7288	6.30963	148.365	1.14	3.92083	413.832	1.2392	1.35	24.7603	0.422232	558.674	96.7149	32.185	82.976	36	1.87788
2021-03-09 23:30:00	368.5	17.7761	6.68	124.707	1.14	3.94583	408.617	1.2392	1.35	24.7416	0.464061	551.632	96.6891	28.5332	68.7631	36	1.9932
2021-03-10 00:30:00	354.875	14.9559	5.89	127.627	1.14	3.93229	409.205	1.2392	1.35	24.74	0.347303	552.426	89.4321	31.7873	84.8999	36	1.96382
2021-03-10 01:30:00	355.625	16.9764	6.35	147.885	1.14	3.91104	408.892	1.2392	1.35	24.74	0.430423	552.004	97.3643	27.8446	79.2017	36	1.91964
2021-03-10 02:30:00	348.375	16.5371	5.52	148.106	1.14	3.88979	418.365	1.2392	1.35	24.74	0.381808	564.792	92.6035	27.6749	87.8732	36	1.91508
2021-03-10 03:30:00	362.5	16.5529	6.82	135.849	1.14	3.86854	410.251	1.2392	1.35	26.65	0.389473	553.839	95.8022	31.8084	79.8948	36	1.92632
2021-03-10 04:30:00	349.875	16.7171	6.25	119.305	1.14	3.84729	415.129	1.2392	1.35	26.65	0.355485	560.425	90.7743	28.6965	82.559	36	2.02933
2021-03-10 05:30:00	355.5	16.4271	5.62	126.859	1.14	3.82604	405.488	1.2392	1.35	26.65	0.36483	547.408	91.1377	28.731	79.7709	36	1.99104
2021-03-10 06:30:00	355.75	16.4853	4.91	125.393	1.14	3.80479	418.171	1.2392	1.35	26.65	0.342611	564.531	87.8911	27.9021	84.5086	36	1.98294
2021-03-10 07:30:00	361.125	17.1671	6.28	123.965	1.14	3.78354	416.681	1.2392	1.35	26.65	0.385502	562.52	93.2195	30.7414	84.2078	36	1.96275
2021-03-10 08:30:00	374.875	14.7486	5.31	118.738	1.14	3.79875	404.087	1.2392	1.35	26.65	0.334947	545.518	88.0733	31.1147	87.0887	36	1.92825
2021-03-10 09:30:00	348.25	17.598	4.68	117.691	1.14	3.82125	412.583	1.2392	1.35	26.65	0.363973	556.987	88.1569	30.939	83.7209	36	2.02954
2021-03-10 10:30:00	359.75	17.3926	4.68	118.856	1.14	3.84375	411.39	1.2392	1.35	26.65	0.375521	555.377	88.8289	30.4868	81.9973	36	1.99396
2021-03-10 11:30:00	354.5	16.5109	5.5	124.688	1.14	3.86625	410.728	1.2392	1.35	26.65	0.355503	554.483	89.7515	30.3505	82.1059	36	1.98947
2021-03-10 12:30:00	360.75	16.1898	5.76525	124.975	1.14	3.88875	407.792	1.2392	1.35	27.69	0.345036	550.519	90.0559	30.4453	85.6797	36	1.95656
2021-03-10 13:30:00	362.25	17.3481	5.69639	121.926	1.14	3.91125	410.247	1.2392	1.35	27.69	0.372828	553.833	90.9809	30.3423	77.555	36	1.98934
2021-03-10 14:30:00	356.875	17.2891	5.42	121.712	1.14	3.93375	416.915	1.2392	1.35	27.69	0.352111	562.836	88.9396	30.3137	80.6091	36	1.99784
2021-03-10 15:30:00	365.875	17.3791	5.71	133.767	1.14	3.95625	418.77	1.2392	1.35	27.69	0.372099	565.34	91.6076	30.8192	77.4855	36	1.93369
2021-03-10 16:30:00	362.875	18.1751	6.49627	125.652	1.14	3.44	418.989	1.2392	1.35	27.22	0.41485	565.635	96.8458	27.1757	71.3143	36	2.00425
2021-03-10 17:30:00	364.25	17.5004	6.56746	126.909	1.14	3.44	415.394	1.2392	1.35	27.22	0.404607	560.782	96.8874	30.5938	86.3456	36	1.93618
2021-03-10 18:30:00	358	16.9904	5.52	122.938	1.14	3.44	412.754	1.2392	1.35	27.22	0.372764	557.218	92.9523	30.9299	88.5218	36	1.96209
2021-03-10 19:30:00	356.75	16.695	5.32417	126.191	1.14	3.44	408.725	1.2392	1.35	27.22	0.367627	551.779	92.7065	30.3922	79.3557	36	1.98538
2021-03-10 20:30:00	359.375	16.6365	5.43896	129.145	1.14	3.44	412.283	1.2392	1.35	27.22	0.36756	556.583	93.1399	31.0594	29.9989	36	2.13472
2021-03-10 21:30:00	360.875	15.9637	5.55374	126.894	1.14	3.44	413.832	1.2392	1.35	27.22	0.349445	558.674	92.2432	27.791	87.3813	36	1.95227
2021-03-10 22:30:00	340.875	12.9301	5.66852	125.737	1.14	3.44	408.787	1.2392	1.35	27.22	0.253112	551.863	86.2651	30.2955	86.8266	36	2.01516
2021-03-10 23:30:00	328.625	16.9534	6.29	125.153	1.14	4.22229	428.123	1.2392	1.35	21.41	0.405519	577.966	90.0685	30.6063	83.0104	36	2.07173
2021-03-11 00:30:00	328.125	17.2676	4.95	124.415	1.14	4.20104	411.697	1.2392	1.35	21.41	0.42167	555.792	88.5584	27.4931	77.63	36	2.10717
2021-03-11 01:30:00	337.875	15.646	5.05	123.135	1.14	4.17979	414.233	1.2392	1.35	21.41	0.37963	559.214	85.9797	28.5278	90.4301	36	2.0291
2021-03-11 02:30:00	354.5	16.774	6.28	131.107	1.14	4.15854	415.336	1.2392	1.35	23.43	0.421383	560.704	93.0959	28.1943	76.5174	36	1.99087
2021-03-11 03:30:00	357.25	16.9044	4.45	131.358	1.14	4.13729	414.022	1.2392	1.35	23.43	0.407391	558.93	88.3426	28.0635	71.1026	36	1.99911
2021-03-11 04:30:00	358.5	16.0867	6.53	122.504	1.14	4.11604	414.655	1.2392	1.35	23.43	0.404649	559.784	92.0271	31.8377	81.9748	36	1.98016
2021-03-11 05:30:00	358.75	15.8765	6.53	124.987	1.14	4.09479	411.272	1.2392	1.35	23.43	0.405453	555.217	92.6036	29.6443	81.7379	36	1.97805
2021-03-11 06:30:00	353.75	15.9767	5.4	124.65	1.14	4.07354	414.746	1.2392	1.35	23.43	0.381839	559.907	88.6308	32.9011	74.0599	36	2.01023
2021-03-11 07:30:00	353	16.2698	5.4	126.172	1.14	4.07	420.439	1.2392	1.35	23.43	0.38311	567.593	88.7108	27.9874	84.4075	36	1.98905
2021-03-11 08:30:00	324.875	15.4159	4.37	125.774	1.14	4.07	427.745	1.2392	1.35	23.43	0.293803	577.455	79.371	28.0994	83.8869	36	2.08841
2021-03-11 09:30:00	348.75	16.6328	5.13	128.902	1.14	4.07	423.043	1.2392	1.35	23.43	0.382586	571.109	88.2552	32.0626	88.0877	36	1.96768
2021-03-11 10:30:00	360.25	16.4876	5.13	125.894	1.14	4.07	413.22	1.2392	1.35	23.43	0.407917	557.848	89.7631	29.5443	76.7083	36	1.98647
2021-03-11 11:30:00	352.375	14.8238	4.39	127.027	1.14	4.07	406.453	1.2392	1.35	23.43	0.341333	548.711	84.0098	29.7176	84.1221	36	1.98321
2021-03-11 12:30:00	358.625	16.5719	5.19	128.038	1.14	3.66	415.005	1.2392	1.35	30.15	0.313324	560.257	89.0544	29.2663	91.5089	36	1.93774
2021-03-11 13:30:00	357.25	15.3786	4.7	132.33	1.14	3.66	413.323	1.2392	1.35	30.15	0.281496	557.986	86.1972	31.8209	84.4378	36	1.94084
2021-03-11 14:30:00	358.25	17.6527	5.61	131.668	1.14	3.66	425.688	1.2392	1.35	30.15	0.332572	574.679	91.1173	31.1265	73.1462	36	1.97803
2021-03-11 15:30:00	359.25	14.3292	5.08034	125.672	1.14	3.66	427.027	1.2392	1.35	30.15	0.246587	576.486	83.2584	30.9812	79.9836	36	1.97527
2021-03-11 16:30:00	355.5	14.8097	5.02303	124.662	1.14	3.84	412.784	1.2392	1.35	21.45	0.391185	557.259	88.8137	27.5414	83.5975	36	1.99061
2021-03-11 17:30:00	355	17.3929	4.96573	132.164	1.14	3.88	420.294	1.2392	1.35	21.45	0.473576	567.396	93.3476	30.2861	85.3387	36	1.95044
2021-03-11 18:30:00	370.5	16.82	6.11	126.393	1.14	3.88	414.023	1.2392	1.35	21.45	0.503392	558.932	96.8453	30.8079	70.5526	36	1.96736
2021-03-11 19:30:00	361.375	15.8888	5.28	127.068	1.14	3.88	416.594	1.2392	1.35	21.45	0.437644	562.402	91.9489	30.6402	82.572	36	1.95625
2021-03-11 20:30:00	363.125	16.3734	5.58	129.25	1.14	3.88	409.671	1.2392	1.35	21.45	0.475644	553.056	94.9037	31.268	85.2204	36	1.93281
2021-03-11 21:30:00	367.125	15.92	5.58	132.733	1.14	3.88	402.747	1.2392	1.35	21.45	0.479367	543.709	95.6544	30.1355	78.738	36	1.93171
2021-03-11 22:30:00	351.5	17.0103	5.11	134.171	1.14	3.88	412.127	1.2392	1.35	21.45	0.47077	556.372	93.9646	29.792	79.3799	36	1.9748
2021-03-11 23:30:00	357.125	16.3931	5.39	138.634	1.14	4.37	418.317	1.2392	1.35	28.11	0.31614	564.728	85.7232	29.8306	83.3411	36	1.92856
2021-03-12 00:30:00	346.75	16.9063	5.00503	129.199	1.14	4.37	409.94	1.2392	1.35	28.11	0.318232	553.42	84.4489	29.5439	79.9901	36	2.0077
2021-03-12 01:30:00	371.125	17.5679	5.06183	129.119	1.14	4.37	410.675	1.2392	1.35	28.11	0.367898	554.412	87.939	29.1756	79.2943	36	1.93332
2021-03-12 02:30:00	356.75	17.9604	5.11864	127.945	1.14	4.37	415.724	1.2392	1.35	28.11	0.352864	561.228	86.8814	32.1261	81.4308	36	1.96667
2021-03-12 03:30:00	361.75	17.5364	5.38	125.33	1.14	4.37	409.579	1.2392	1.35	28.11	0.357759	552.932	87.6544	31.9425	84.4447	36	1.95131
2021-03-12 04:30:00	348.5	17.2476	5.61548	131.955	1.14	3.69	428.21	1.2392	1.35	29.21	0.320104	578.083	89.9252	30.7572	79.8577	36	1.98803
2021-03-12 05:30:00	364.25	17.6418	5.532	134.194	1.14	3.69	409.019	1.2392	1.35	29.21	0.371485	552.175	93.2411	30.4556	82.3994	36	1.92321
2021-03-12 06:30:00	357.25	18.2929	5.42	142.038	1.14	3.69	410.114	1.2392	1.35	29.21	0.380046	553.654	94.0486	27.5585	80.1217	36	1.93313
2021-03-12 07:30:00	355	18.9795	5.42	134.658	1.14	3.69	410.693	1.2392	1.35	29.21	0.390403	554.436	93.8388	27.887	76.5679	36	1.97693
2021-03-12 08:30:00	357	16.4514	5.69	135.387	1.14	3.69	415.88	1.2392	1.35	29.21	0.32661	561.438	91.1995	30.6162	84.511	36	1.93432
2021-03-12 09:30:00	353.875	18.0678	5.16831	139.572	1.14	3.69	409.722	1.2392	1.35	29.21	0.366616	553.125	92.6425	30.395	82.6408	36	1.9357
2021-03-12 10:30:00	347.25	18.0985	5.15986	136.66	1.14	3.69	412.766	1.2392	1.35	29.21	0.353879	557.234	91.6515	30.9352	74.6131	36	1.99114
2021-03-12 11:30:00	337.625	17.9683	5.15141	133.171	1.14	3.69	408.859	1.2392	1.35	29.21	0.341607	551.959	90.787	27.3522	80.1113	36	2.03013
2021-03-12 12:30:00	518.923	16.8016	5.82	114.275	1.14	4.12	404.952	1.2392	1.35	24.34	0.653575	546.685	99.7468	30.2643	83.0512	36	1.58921
2021-03-12 13:30:00	359.675	17.9209	7.16	120.838	1.14	4.12	407.385	1.2392	1.35	24.34	0.464566	549.97	96.4798	30.8288	80.3784	36	1.99099
2021-03-12 14:30:00	350.123	17.8317	7.16	114.2	1.14	4.12	411.5	1.2392	1.35	24.34	0.43504	555.524	94.2192	30.7897	80.8472	36	2.04712
2021-03-12 15:30:00	356.58	18.3827	6.59	117.986	1.14	4.12	410.973	1.2392	1.35	24.34	0.459556	554.813	94.676	30.8421	83.9176	36	2.00017
2021-03-12 16:30:00	374.057	17.2959	7.08	125.664	1.14	3.55167	405.181	1.2392	1.35	23.56	0.506298	546.995	100.852	30.4085	83.2407	36	1.92054
2021-03-12 17:30:00	365.517	16.3229	5.12	119.366	1.14	3.53917	411.716	1.2392	1.35	23.56	0.421991	555.816	92.6202	30.8212	87.0045	36	1.95633
2021-03-12 18:30:00	359.315	17.2035	5.12	114.604	1.14	3.52667	400.016	1.2392	1.35	23.56	0.457175	540.021	94.0972	30.9081	78.3503	36	2.02227
2021-03-12 19:30:00	348.647	17.5263	5.55	118.479	1.14	3.51417	403.848	1.2392	1.35	23.56	0.452398	545.195	95.098	31.1772	81.3135	36	2.03251
2021-03-12 20:30:00	352.515	18.2607	6.15	118.782	1.14	3.50167	414.953	1.2392	1.35	23.56	0.472422	560.187	96.8602	31.0458	77.8655	36	2.03035
2021-03-12 21:30:00	353.78	18.132	6.15	116.182	1.14	3.48917	402.741	1.2392	1.35	23.56	0.488634	543.7	97.5752	30.7876	82.1489	36	2.02247
2021-03-12 22:30:00	349.833	17.85	4.49	118.772	1.14	3.47667	413.539	1.2392	1.35	23.56	0.438056	558.278	92.2691	31.0312	79.2992	36	2.0347
2021-03-12 23:30:00	395.465	17.5469	5.28	124.892	1.14	3.46417	409.416	1.2392	1.35	30.49	0.386696	552.712	93.9109	30.7302	79.7909	36	1.869
2021-03-13 00:30:00	348.163	18.6736	4.73553	120.658	1.14	3.46	370.398	1.2392	1.35	30.49	0.401207	500.037	94.0841	30.9979	74.0195	36	2.05134
2021-03-13 01:30:00	349.489	18.0567	5.34	130.792	1.14	3.46	410.163	1.2392	1.35	30.49	0.346824	553.72	92.7869	31.3685	83.625	36	1.97493
2021-03-13 02:30:00	343.441	19.0669	4.03	121.199	1.14	3.46	423.968	1.2392	1.35	27.6	0.370916	572.356	89.4783	27.4247	75.6561	36	2.07254
2021-03-13 03:30:00	331.128	19.3796	5.86	111.724	1.14	3.46	420.712	1.2392	1.35	27.6	0.379147	567.962	92.618	31.2684	85.3304	36	2.10713
2021-03-13 04:30:00	367.133	18.8336	6.29	113.57	1.14	3.46	408.274	1.2392	1.35	27.6	0.437553	551.17	96.2651	30.9564	73.9981	36	2.01442
2021-03-13 05:30:00	368.829	18.4558	6.67	114.961	1.14	3.46	381.648	1.2392	1.35	27.6	0.474251	515.224	99.0731	27.9331	74.072	36	2.01331
2021-03-13 06:30:00	264.03	17.3018	5.79	113.589	1.14	3.46	254.873	1.2392	1.35	27.6	0.49692	344.079	103.302	30.335	74.6445	36	2.43086
2021-03-13 07:30:00	320.54	20.138	5.46431	143.544	1.14	3.46	359.267	1.2392	1.35	27.6	0.484371	485.01	100.447	30.758	80.9704	38	2.03352
2021-03-13 08:30:00	331.863	20.2824	5.54236	151.805	1.14	3.47362	405.561	1.2392	1.35	27.6	0.438196	547.507	98.3761	30.8369	82.5497	35	1.95985
2021-03-13 09:30:00	344.176	19.8078	4.77933	119	1.14	3.49404	413.816	1.2392	1.35	27.6	0.409433	558.652	92.6013	30.582	81.4388	38	2.04744
2021-03-13 10:30:00	348.004	18.3472	4.85933	121.796	1.14	3.51447	423.102	1.2392	1.35	27.6	0.367236	571.188	90.6731	31.1501	86.9499	38	2.00312
2021-03-13 11:30:00	335.979	21.0508	4.93933	123.333	1.14	3.53489	423.055	1.2392	1.35	27.6	0.418232	571.124	93.2127	30.6473	81.6773	38	2.05771
2021-03-13 12:30:00	368.305	20.043	4.72	113.914	1.14	3.55532	420.829	1.2392	1.35	30.38	0.392073	568.119	91.6692	30.308	87.6676	38	1.96674
2021-03-13 13:30:00	356.271	20.0113	6.19	161.664	1.14	3.57574	418.603	1.2392	1.35	30.38	0.41258	565.114	99.3519	30.9493	79.5942	38	1.86111
2021-03-13 14:30:00	354.472	20.2744	4.65	117.495	1.14	3.59617	414.717	1.2392	1.35	30.38	0.386529	559.868	91.48	30.2561	79.0411	38	2.02738
2021-03-13 15:30:00	349.518	20.3484	6.19	121.322	1.14	3.6166	414.384	1.2392	1.35	30.38	0.397078	559.419	94.8861	30.9029	83.9982	38	2.01052
2021-03-13 16:30:00	357.086	20.6279	4.46	114.62	1.14	3.88	414.823	1.2392	1.35	24.28	0.505581	560.011	93.3271	27.4472	71.1376	38	2.06671
2021-03-13 17:30:00	355.957	20.9722	5.59	121.786	1.14	3.88	415.707	1.2392	1.35	24.28	0.529658	561.205	96.677	30.4639	66.1978	38	2.04883
2021-03-13 18:30:00	357.363	20.6036	4.39	114.882	1.14	3.88	415.715	1.2392	1.35	24.28	0.503145	561.216	93.1146	29.9489	67.7452	38	2.06782
2021-03-13 19:30:00	362.624	20.95	5.18	119.847	1.14	3.88	415.723	1.2392	1.35	24.28	0.535166	561.227	95.992	30.2593	70.0049	38	2.02129
2021-03-13 20:30:00	344.158	21.0164	5.23941	125.902	1.14	3.88	413.001	1.2392	1.35	24.28	0.511838	557.551	95.7965	29.9385	72.2695	38	2.05425
2021-03-13 21:30:00	342.232	19.0259	5.17765	128.607	1.14	3.88	409.061	1.2392	1.35	24.28	0.455169	552.233	93.7296	29.6024	75.0538	38	2.04177
2021-03-13 22:30:00	328.911	20.3432	6.08	129.948	1.14	3.88	408.284	1.2392	1.35	23.82	0.496169	551.183	97.3578	30.208	69.4131	38	2.10135
2021-03-13 23:30:00	333.66	19.9319	6.08	125.677	1.14	3.88	408.041	1.2392	1.35	23.8175	0.49025	550.856	96.7159	31.478	69.1505	38	2.09812
2021-03-14 00:30:00	360.447	20.2727	5.28	125.071	1.14	3.88	407.798	1.2392	1.35	23.815	0.539785	550.528	96.8495	27.5575	75.7729	38	1.99847
2021-03-14 01:30:00	349.769	19.9342	5.77	111.126	1.14	3.88	416.281	1.2392	1.35	23.8125	0.493037	561.98	94.6294	30.8978	80.2084	38	2.06242
2021-03-14 02:30:00	337.29	20.0754	5.77	112.069	1.14	3.88	416.609	1.2392	1.35	23.81	0.475169	562.422	93.9728	30.161	80.8528	38	2.10357
2021-03-14 03:30:00	345.034	19.6196	5.42059	111.57	1.14	3.47	419.754	1.2392	1.35	23.8075	0.476591	566.668	94.981	30.2668	84.0899	38	2.06586
2021-03-14 04:30:00	349.126	18.8179	5.36765	111.569	1.14	3.47	421.285	1.2392	1.35	23.805	0.456456	568.734	94.064	30.5044	75.2262	38	2.08195
2021-03-14 05:30:00	344.521	19.2644	5.89	111.303	1.14	3.47	422.406	1.2392	1.35	23.8025	0.466217	570.248	95.3462	27.5058	78.0561	38	2.10027
2021-03-14 06:30:00	333.479	19.2786	6.08714	113.402	1.14	3.47	422.068	1.2392	1.35	23.8	0.452248	569.792	95.3948	30.1366	74.6753	38	2.13505
2021-03-14 07:30:00	344.121	19.576	5.21	114.792	1.14	3.47	415.893	1.2392	1.35	23.8	0.479224	561.456	95.0596	30.5597	80.8158	38	2.06663
2021-03-14 08:30:00	346.012	19.0652	4.96	116.206	1.14	3.47	415.484	1.2392	1.35	23.8	0.465442	560.903	94.1887	30.5373	83.2764	38	2.04591
2021-03-14 09:30:00	353.854	19.049	4.56	109.64	1.14	3.47	415.536	1.2392	1.35	23.8	0.470333	560.973	93.1596	30.4463	85.7444	38	2.0365
2021-03-14 10:30:00	343.871	18.7864	5.42	116.186	1.14	3.47	411.322	1.2392	1.35	23.8	0.46516	555.284	95.1601	30.3703	80.4759	38	2.06378
2021-03-14 11:30:00	342.021	18.8522	5.42	115.758	1.14	3.47	416.147	1.2392	1.35	23.8	0.456484	561.798	94.6601	27.2639	81.2029	38	2.0805
2021-03-14 12:30:00	353.834	21.6014	5.42	114.908	1.14	3.72	405.7	1.2392	1.35	20.45	0.689286	547.695	101.007	30.2869	82.1186	38	2.029
2021-03-14 13:30:00	114.146	20.6506	5.42	-3.65864	1.14	3.72	183.589	1.2392	1.35	20.45	0.340678	247.845	73.2525	27.3434	83.0142	38	5.49981
2021-03-14 14:30:00	62.2812	20.6597	6.29	1.41105	1.14	3.72	26.9117	1.2392	1.35	20.45	1.91124	36.3307	110.358	30.202	80.6169	15	6.93606
2021-03-14 15:30:00	126.703	20.2796	6.29	1.67996	1.14	3.72	162.575	1.2392	1.35	20.45	0.480707	219.477	83.9683	27.4741	81.4195	35	5.10202
2021-03-14 16:30:00	167.227	18.4737	5.69	114.089	1.14	3.72	163.424	1.2392	1.35	20.45	0.815126	220.622	119.044	30.3001	79.1041	0	2.97962
2021-03-14 17:30:00	359.58	19.0583	5.36756	124.675	1.14	3.72	395.22	1.2392	1.35	20.45	0.630846	533.547	100.441	30.3557	87.6665	0	1.95535
2021-03-14 18:30:00	358.17	21.7572	5.28463	130.119	1.14	3.72	407.997	1.2392	1.35	20.45	0.708393	550.796	102.392	30.1892	79.4113	0	1.96685
2021-03-14 19:30:00	337.568	20.2155	6.29	128.571	1.14	3.72	394.948	1.2392	1.35	20.45	0.646027	533.18	103.222	30.2469	84.7718	0	2.02249
2021-03-14 20:30:00	354.764	19.8708	5.35	134.832	1.14	3.72	407.184	1.2392	1.35	20.45	0.633603	549.698	101.037	30.7516	81.3398	0	1.95272
2021-03-14 21:30:00	350.057	20.6944	5.35	137.996	1.14	3.72	418.692	1.2392	1.35	20.45	0.632715	565.234	100.957	30.7456	81.7972	0	1.95477
2021-03-14 22:30:00	351.789	20.427	7.08	142.807	1.14	3.72	416.059	1.2392	1.35	20.45	0.665025	561.68	106.3	30.3969	81.5841	0	1.93401
2021-03-14 23:30:00	348.953	20.9946	6.33	109.653	1.14	3.8	413.898	1.2392	1.35	29.57	0.416278	558.762	93.8831	30.5076	83.2099	0	2.06201
2021-03-15 00:30:00	349.305	20.0199	5.15	145.772	1.14	3.92	417.735	1.2392	1.35	29.57	0.38978	563.943	92.9479	30.6144	79.0515	0	1.9384
2021-03-15 01:30:00	339.93	19.8968	4.71	133.164	1.14	3.93	427.67	1.2392	1.35	29.57	0.351915	577.354	88.8299	30.2126	83.5373	0	2.00135
2021-03-15 02:30:00	346.471	18.0816	5.62	133.649	1.14	3.93	422.592	1.2392	1.35	29.57	0.333544	570.5	89.8164	29.9934	80.0473	0	1.99022
2021-03-15 03:30:00	348.428	19.7031	5.31	136.341	1.14	3.42	414.527	1.2392	1.35	26.42	0.448802	559.612	96.6556	30.5518	77.5858	0	1.98007
2021-03-15 04:30:00	353.324	20.3586	5.58877	133.678	1.14	3.42	413.132	1.2392	1.35	26.42	0.478452	557.728	98.0102	30.3349	79.7184	0	1.96793
2021-03-15 05:30:00	355.461	20.4691	4.7	134.496	1.14	3.42	415.664	1.2392	1.35	26.42	0.47089	561.147	95.9484	30.4091	77.5268	0	1.96489
2021-03-15 06:30:00	342.564	19.6418	7.21	142.655	1.14	3.42	421.11	1.2392	1.35	26.42	0.455576	568.498	101.695	30.4844	76.5433	0	1.97934
2021-03-15 07:30:00	347.643	21.1004	5.35	163.116	1.14	3.42	429.186	1.2392	1.35	26.42	0.476406	579.402	99.4181	30.5122	84.3405	0	1.86876
2021-03-15 08:30:00	348.396	20.3235	5.46538	127.446	1.14	3.42	425.297	1.2392	1.35	26.42	0.447625	574.151	95.8961	30.0385	84.8358	0	1.99124
2021-03-15 09:30:00	348.594	20.8163	6.18	132.837	1.14	3.42	432.112	1.2392	1.35	26.42	0.461891	583.351	98.1024	30.3017	92.5254	0	1.94554
2021-03-15 10:30:00	345.812	19.7998	6.18	132.091	1.14	3.42	427.565	1.2392	1.35	26.42	0.43715	577.212	97.3639	27.0377	76.1416	0	2.02108
2021-03-15 11:30:00	340.82	17.18	4.59	138.756	1.14	3.43633	421.527	1.2392	1.35	26.42	0.353683	569.062	90.815	30.0311	73.1829	0	2.01222
2021-03-15 12:30:00	346.793	18.7791	5.37	139.097	1.14	3.46433	429.095	1.2392	1.35	30.39	0.343464	579.278	92.8441	29.7668	68.9694	0	2.00594
2021-03-15 13:30:00	344.387	19.0654	5.00939	133.061	1.14	3.49233	416.757	1.2392	1.35	30.39	0.354248	562.621	92.2487	30.5368	84.6438	0	1.98246
2021-03-15 14:30:00	346.596	19.0395	4.89918	131.178	1.14	3.52033	423.095	1.2392	1.35	30.39	0.346699	571.178	91.196	30.4135	78.5024	0	2.00278
2021-03-15 15:30:00	343.547	15.3194	6.33	128.759	1.14	3.54833	426.645	1.2392	1.35	30.39	0.268328	575.971	89.2418	30.3339	86.5349	0	1.9957
2021-03-15 16:30:00	352.139	16.6131	5.22	135.748	1.14	3.25	416.758	1.2392	1.35	32.45	0.293963	562.623	91.7404	0.858733	0.247567	0	2.38543
2021-03-15 17:30:00	343.703	18.715	6.5	130.209	1.14	3.25	411.984	1.2392	1.35	32.45	0.344183	556.178	96.5706	1.01849	0.244678	0	2.45598
2021-03-15 18:30:00	346.01	21.6425	5.72	128.708	1.14	3.25	411.698	1.2392	1.35	32.45	0.401837	555.793	96.7791	27.5971	60.9705	0	2.0846
2021-03-15 19:30:00	341.098	17.6441	5.37	132.62	1.14	3.25	406.32	1.2392	1.35	32.45	0.315132	548.532	93.2031	28.1368	53.1503	0	2.11271
2021-03-15 20:30:00	341.186	19.8867	5.4287	132.243	1.14	3.25	385.93	1.2392	1.35	32.45	0.388489	521.005	96.8013	29.1331	50.5003	0	2.12009
2021-03-15 21:30:00	355.236	16.5768	5.46599	129.744	1.14	3.25	412.547	1.2392	1.35	32.45	0.300512	556.938	92.2284	29.3559	73.7727	0	1.99875
2021-03-15 22:30:00	344.57	18.8816	5.50328	126.067	1.14	3.25	413.727	1.2392	1.35	32.45	0.336115	558.531	93.6338	28.6984	83.2068	0	2.019
2021-03-15 23:30:00	346.771	15.0738	5.13	135.415	1.14	3.91	385.533	1.2392	1.35	29.44	0.299833	520.47	87.8915	31.0561	55.9126	0	2.06047
2021-03-16 00:30:00	367.65	16.2275	6.34	123.695	1.14	3.91	409.403	1.2392	1.35	29.44	0.333022	552.694	90.8256	27.2944	76.7044	0	1.97791
2021-03-16 01:30:00	349.314	19.8662	5.59081	126.386	1.14	3.91	410.381	1.2392	1.35	29.44	0.394435	554.014	92.7049	30.8281	85.7299	0	1.9867
2021-03-16 02:30:00	349.045	19.9605	5.59452	129.867	1.14	3.91	409.438	1.2392	1.35	29.44	0.39926	552.741	93.253	28.0248	79.7487	0	2.0034
2021-03-16 03:30:00	346.795	16.0179	5.59824	118.738	1.14	3.4	409.186	1.2392	1.35	26.31	0.350405	552.401	91.6784	23.2939	83.3143	0	2.05819
2021-03-16 04:30:00	338.936	16.2531	5.60195	117.7	1.14	3.4	408.165	1.2392	1.35	26.31	0.34751	551.022	91.4543	28.8394	81.3702	0	2.07739
2021-03-16 05:30:00	307.678	16.2531	5.60567	117.97	1.14	3.4	407.921	1.2392	1.35	26.31	0.307714	550.694	89.155	28.8176	78.6159	0	2.20487
2021-03-16 06:30:00	362.854	16.2531	5.60938	157.792	1.14	3.4	407.678	1.2392	1.35	26.31	0.399344	550.366	98.051	30.1839	80.9885	0	1.85315
2021-03-16 07:30:00	357.477	16.2531	6.28	130.836	1.14	3.4	320.202	1.2392	1.35	26.31	0.532855	432.272	104.305	30.1796	79.9299	0	1.96484
2021-03-16 08:30:00	380.938	16.578	5.78	126.171	1.14	3.4	385.939	1.2392	1.35	26.31	0.450306	521.018	97.7452	29.7027	84.9348	0	1.89517
2021-03-16 09:30:00	351.23	8.0518	6.15	128.748	1.14	3.4	412.404	1.2392	1.35	26.31	0.144081	556.745	74.6275	29.4308	85.871	0	1.97583
2021-03-16 10:30:00	335.604	18.19	6.15	117.15	1.14	3.4	395.108	1.2392	1.35	26.31	0.418361	533.396	96.1752	28.9362	78.4473	0	2.10184
2021-03-16 11:30:00	361.779	9.6412	5.02977	120.476	1.14	3.39368	415.309	1.2392	1.35	26.31	0.177147	560.667	74.9178	28.5964	70.2264	0	2.02659
2021-03-16 12:30:00	397.303	14.8946	5.12279	122.453	1.14	3.38105	412.236	1.2392	1.35	31.96	0.298727	556.519	89.7865	31.9905	76.8731	0	1.87652
2021-03-16 13:30:00	376.254	13.65	4.87965	117.147	1.14	3.36842	413.998	1.2392	1.35	31.96	0.244367	558.898	84.99	28.4327	76.9907	0	1.96967
2021-03-16 14:30:00	369.344	19.5675	4.98491	110.203	1.14	3.35579	410.012	1.2392	1.35	31.96	0.378699	553.517	92.6971	30.2768	69.7238	0	2.0367
2021-03-16 15:30:00	359.238	16.8555	5.23	121.606	1.14	3.34316	408.709	1.2392	1.35	31.96	0.312585	551.757	91.0328	30.1931	74.9012	0	2.00973
2021-03-16 16:30:00	388.787	7.99895	6.02	126.185	1.14	3.52	408.112	1.2392	1.35	27.58	0.153632	550.951	75.066	30.1288	77.0183	0	1.89406
2021-03-16 17:30:00	372.761	6.7409	4.68	125.816	1.14	3.56	402.075	1.2392	1.35	27.58	0.0959975	542.802	57.1935	30.2177	77.9959	0	1.94071
2021-03-16 18:30:00	359.439	10.7179	5.89	131.637	1.14	3.56	409.824	1.2392	1.35	27.58	0.208188	553.263	82.4609	29.8915	76.4977	0	1.96753
2021-03-16 19:30:00	347.563	10.7198	4.53	126.568	1.14	3.56	412.589	1.2392	1.35	27.58	0.179126	556.996	73.8556	29.7619	77.3843	0	2.02303
2021-03-16 20:30:00	347.357	18.5983	4.55	119.404	1.14	3.56	417.311	1.2392	1.35	27.58	0.374959	563.37	90.1825	29.748	71.3855	0	2.07282
2021-03-16 21:30:00	347.603	17.0043	4.55396	128.983	1.14	3.56148	417.877	1.2392	1.35	27.5722	0.337476	564.133	88.8086	28.979	75.7668	0	2.02171
2021-03-16 22:30:00	347.849	16.9616	4.58789	141.08	1.14	3.57924	418.442	1.2392	1.35	27.5251	0.341249	564.897	89.9314	31.3152	73.9512	0	1.97377
2021-03-16 23:30:00	348.095	16.919	4.62183	142.498	1.14	3.597	419.007	1.2392	1.35	27.4781	0.340935	565.66	89.979	31.3669	79.8658	0	1.94892
2021-03-17 00:30:00	348.341	16.8764	4.65577	140.565	1.14	3.61477	419.573	1.2392	1.35	27.431	0.339309	566.423	89.6798	30.8998	81.5282	0	1.95131
2021-03-17 01:30:00	348.587	16.8337	4.6897	145.531	1.14	3.63253	420.138	1.2392	1.35	27.384	0.340404	567.187	90.1	31.0649	82.3634	0	1.92984
2021-03-17 02:30:00	348.833	16.7911	4.72364	126.857	1.14	3.65029	420.704	1.2392	1.35	27.3369	0.332067	567.95	88.0213	31.4783	85.3632	0	1.98559
2021-03-17 03:30:00	349.08	16.7485	4.75757	129.484	1.14	3.66805	421.269	1.2392	1.35	27.2899	0.332198	568.713	88.1843	32.4381	83.016	0	1.97958
2021-03-17 04:30:00	349.326	16.7058	4.79151	117.507	1.14	3.68581	421.835	1.2392	1.35	27.2428	0.326396	569.477	86.7709	29.2129	84.3061	0	2.03047
2021-03-17 05:30:00	349.572	16.6632	4.82544	117.007	1.14	3.70357	422.4	1.2392	1.35	27.1958	0.325221	570.24	86.585	27.8345	77.1868	0	2.06093
2021-03-17 06:30:00	349.818	16.6206	4.85938	118.622	1.14	3.72134	422.966	1.2392	1.35	27.1487	0.324914	571.003	86.6299	31.2705	79.0439	0	2.03539
2021-03-17 07:30:00	350.064	16.578	4.89332	119.353	1.14	3.7391	423.531	1.2392	1.35	27.1017	0.324246	571.767	86.5785	27.7303	81.299	0	2.03609
2021-03-17 08:30:00	350.31	16.5353	4.92725	118.257	1.14	3.75686	424.096	1.2392	1.35	27.0546	0.322809	572.53	86.3216	30.9887	78.7653	0	2.03704
2021-03-17 09:30:00	350.556	16.4927	4.96119	110.532	1.14	3.77462	424.662	1.2392	1.35	27.0076	0.318545	573.294	85.3069	27.7041	80.7369	0	2.07142
2021-03-17 10:30:00	350.802	16.4501	4.99512	132.551	1.14	3.79238	425.227	1.2392	1.35	26.9605	0.326958	574.057	87.6889	27.8925	91.9055	0	1.94913
2021-03-17 11:30:00	351.049	16.4074	5.02906	157.174	1.14	3.81014	425.793	1.2392	1.35	26.9135	0.336647	574.82	90.4208	30.6917	78.2666	0	1.89584
2021-03-17 12:30:00	351.295	16.3648	5.06299	147.05	1.14	3.82791	426.358	1.2392	1.35	26.8664	0.331383	575.584	89.1386	29.9398	89.4035	0	1.89854
2021-03-17 13:30:00	351.541	16.3222	5.09693	151.221	1.14	3.84567	426.924	1.2392	1.35	26.8194	0.332316	576.347	89.5221	29.716	79.3752	0	1.91429
2021-03-17 14:30:00	351.787	16.2795	5.13086	151.093	1.14	3.86343	427.489	1.2392	1.35	26.7723	0.331374	577.11	89.4007	29.0389	85.0676	0	1.89894
2021-03-17 15:30:00	352.033	16.2369	5.1648	159.902	1.14	3.88119	428.055	1.2392	1.35	26.7253	0.334413	577.874	90.3547	27.8599	76.8974	0	1.89615
2021-03-17 16:30:00	352.279	16.1943	5.19874	132.394	1.14	3.89895	428.62	1.2392	1.35	26.6782	0.321182	578.637	86.9091	30.7769	77.6482	0	1.98124
2021-03-17 17:30:00	352.525	16.1516	5.23267	130.074	1.14	3.91671	429.185	1.2392	1.35	26.6312	0.319165	579.4	86.492	30.2512	74.5739	0	2.00086
2021-03-17 18:30:00	352.771	16.109	5.26661	133.108	1.14	3.93448	429.751	1.2392	1.35	26.5841	0.319572	580.164	86.7319	29.6223	76.9096	0	1.98314
2021-03-17 19:30:00	353.018	16.0664	5.734	130.767	1.14	3.95224	430.316	1.2392	1.35	26.5371	0.322447	580.927	87.6432	27.9705	79.8942	0	1.98668
2021-03-17 20:30:00	360.812	14.8932	5.6	126.071	1.14	3.97	423.01	1.2392	1.35	26.49	0.30414	571.064	85.6194	28.0876	75.0061	0	1.9943
2021-03-17 21:30:00	295.075	15.9309	5.6	150.829	1.14	3.97	404.41	1.2392	1.35	26.49	0.284369	545.953	87.4874	30.8317	75.3816	0	2.11396
2021-03-17 22:30:00	311.006	16.2661	4.68	139.811	1.14	3.97	398.715	1.2392	1.35	26.49	0.302584	538.266	85.2852	30.2061	69.3108	0	2.12629
2021-03-17 23:30:00	315.295	16.219	4.68	41.6166	1.14	3.97	374.243	1.2392	1.35	26.49	0.292681	505.228	76.599	29.1542	82.1241	0	2.55643
2021-03-18 00:30:00	319.585	14.4183	5.62	112.739	1.14	3.71312	349.77	1.2392	1.35	30.57	0.282052	472.19	88.3573	31.565	81.9665	0	2.1576
2021-03-18 01:30:00	366.084	17.7452	5.1	112.496	1.14	3.73062	415.674	1.2392	1.35	30.57	0.335751	561.16	88.6621	30.4738	79.645	0	2.00479
2021-03-18 02:30:00	350.39	17.0674	6.01	104.772	1.14	3.74813	418.78	1.2392	1.35	28.04	0.333423	565.353	88.3842	30.602	85.8326	0	2.06697
2021-03-18 03:30:00	350.773	16.495	4.56	108.089	1.14	3.76562	423.337	1.2392	1.35	28.04	0.302447	571.504	83.7661	30.2265	86.6771	0	2.05076
2021-03-18 04:30:00	357.093	17.1364	5.74	120.797	1.14	3.78312	415.67	1.2392	1.35	28.04	0.351666	561.155	90.4252	30.385	83.8368	0	1.98973
2021-03-18 05:30:00	353.454	17.0113	5.25444	121.704	1.14	3.80062	409.535	1.2392	1.35	28.04	0.34627	552.873	89.2787	31.1283	80.3879	0	2.00723
2021-03-18 06:30:00	359.485	15.9824	5.22662	121.082	1.14	3.81813	410.917	1.2392	1.35	28.04	0.32365	554.739	87.6232	27.8045	80.4083	0	2.00054
2021-03-18 07:30:00	353.727	16.115	5.19881	120.329	1.14	3.83562	417.468	1.2392	1.35	28.04	0.311686	563.582	86.4082	30.0525	83.709	0	2.00407
2021-03-18 08:30:00	349.752	15.5709	5.94455	122.281	1.14	3.84	420.12	1.2392	1.35	28.04	0.298479	567.162	87.1616	30.3945	70.0826	0	2.05517
2021-03-18 09:30:00	348.192	16.7491	6.25	127.463	1.14	3.84	415.009	1.2392	1.35	28.04	0.33844	560.262	91.1674	30.1035	76.005	0	2.02097
2021-03-18 10:30:00	347.283	16.0863	6.25	117.683	1.14	3.84	419.454	1.2392	1.35	28.04	0.310178	566.263	88.1591	29.9581	76.885	0	2.05987
2021-03-18 11:30:00	348.624	16.2619	5.81	119.751	1.14	3.84	415.787	1.2392	1.35	28.04	0.317071	561.313	88.0258	28.8523	86.4938	0	2.01801
2021-03-18 12:30:00	337.152	16.6693	5.17	121.443	1.14	4.21	420.851	1.2392	1.35	25.99	0.318721	568.149	83.7406	31.4229	69.1951	0	2.10302
2021-03-18 13:30:00	349.393	16.9063	5.17	115.646	1.14	4.21	399.873	1.2392	1.35	25.99	0.367074	539.828	87.1872	30.6394	94.7844	0	1.9975
2021-03-18 14:30:00	339.073	16.5187	4.51	123.806	1.14	4.21	412.735	1.2392	1.35	25.99	0.320693	557.192	82.9145	30.1601	78.9305	0	2.05631
2021-03-18 15:30:00	345.078	18.0025	6.37	129.447	1.14	4.21	406.969	1.2392	1.35	25.99	0.404415	549.408	92.9563	31.0287	76.0685	0	2.02051
2021-03-18 16:30:00	342.47	18.5515	5.06	133.662	1.14	3.65	420.431	1.2392	1.35	27.9	0.367097	567.582	91.4981	30.0554	82.0883	0	1.9964
2021-03-18 17:30:00	352.391	16.6444	6.21	140.866	1.14	3.65	408.983	1.2392	1.35	27.9	0.362035	552.127	95.0826	32.1604	84.2885	0	1.92523
2021-03-18 18:30:00	361.717	17.0673	5.46	135.546	1.14	3.65	410.202	1.2392	1.35	27.9	0.372027	553.773	93.1059	28.4247	77.1821	0	1.9487
2021-03-18 19:30:00	362.211	16.0714	4.51	135.314	1.14	3.65	410.007	1.2392	1.35	27.9	0.335005	553.509	88.8719	31.1643	77.3182	0	1.93901
2021-03-18 20:30:00	369.877	15.545	6.05	128.797	1.14	3.65	401.284	1.2392	1.35	27.9	0.354777	541.734	93.2604	30.26	74.6795	0	1.94933
2021-03-18 21:30:00	359.287	16.0289	6.05	130.179	1.14	3.65	418.625	1.2392	1.35	27.9	0.335216	565.143	91.7789	30.2155	78.6012	0	1.96557
2021-03-18 22:30:00	356.76	15.3777	4.91	131.973	1.14	3.65	421.179	1.2392	1.35	27.9	0.300942	568.591	87.0202	29.4945	76.3134	0	1.97676
2021-03-18 23:30:00	339.604	16.2135	5.69	130.568	1.14	3.77	424.187	1.2392	1.35	20.44	0.439363	572.652	93.3999	29.2628	76.6785	0	2.0387
2021-03-19 00:30:00	355.9	15.8358	5.22	126.305	1.14	3.86625	412.07	1.2392	1.35	20.44	0.459531	556.295	92.7109	31.0047	76.9086	0	1.99373
2021-03-19 01:30:00	358.68	17.2823	6.39588	126.824	1.14	3.89125	409.73	1.2392	1.35	20.44	0.543074	553.135	99.0519	30.3149	76.9496	0	1.98484
2021-03-19 02:30:00	355.445	16.8866	6.46647	130.216	1.14	3.91625	422.354	1.2392	1.35	20.44	0.50196	570.178	97.4646	30.6849	74.6444	0	1.98908
2021-03-19 03:30:00	350.977	15.1677	4.53	154.149	1.14	3.94125	412.793	1.2392	1.35	17.57	0.516559	557.271	95.0081	30.5436	76.1523	0	1.91314
2021-03-19 04:30:00	351.668	15.5175	5.91	133.039	1.14	3.96625	412.324	1.2392	1.35	17.57	0.547464	556.638	98.1169	29.9663	74.6215	0	1.99334
2021-03-19 05:30:00	364.496	14.9628	5.91	131.733	1.14	3.99125	402.292	1.2392	1.35	17.57	0.565973	543.094	99.0232	30.4134	90.0604	0	1.90789
2021-03-19 06:30:00	358.262	16.2973	5.13	162.218	1.14	4.01625	405.207	1.2392	1.35	17.57	0.619124	547.029	101.916	30.6573	86.6708	0	1.8346
2021-03-19 07:30:00	257.553	15.7081	5.51	159.01	1.14	4.04125	368.866	1.2392	1.35	17.57	0.450068	497.968	97.3334	30.701	83.1387	0	2.19263
2021-03-19 08:30:00	385.66	15.0888	5.25	134.005	1.14	4.05802	406.363	1.2392	1.35	17.57	0.59291	548.59	98.2087	29.9593	86.4405	0	1.85055
2021-03-19 09:30:00	358.932	15.6608	6.11	127.324	1.14	4.05011	407.258	1.2392	1.35	17.57	0.575969	549.798	98.9799	30.4383	86.0689	0	1.95265
2021-03-19 10:30:00	346.137	15.8736	3.85	126.061	1.14	4.0422	408.622	1.2392	1.35	17.57	0.511611	551.639	90.2493	30.6498	83.2015	0	2.00728
2021-03-19 11:30:00	340.818	16.0475	3.85	126.156	1.14	4.03429	414.848	1.2392	1.35	17.57	0.496477	560.045	89.3231	30.5501	83.2813	0	2.02482
2021-03-19 12:30:00	333.506	18.5698	6.67	127.565	1.14	4.02637	411.818	1.2392	1.35	28.51	0.361792	555.954	92.5944	30.2283	63.532	0	2.11596
2021-03-19 13:30:00	344.742	16.3948	4.50286	124.242	1.14	4.01846	407.266	1.1268	1.35	28.51	0.30302	549.81	84.0387	30.0458	77.4581	0	2.04045
2021-03-19 14:30:00	345.773	16.7352	4.51798	121.766	1.14	4.01055	405.315	1.1274	1.35	28.51	0.314742	547.175	84.8508	29.7207	70.2317	0	2.07307
2021-03-19 15:30:00	339.25	13.3636	4.22	124.154	1.14	4.00264	409.052	1.2465	1.35	28.51	0.215802	552.22	74.9413	28.8565	78.3809	0	2.06079
2021-03-19 16:30:00	358.324	14.812	5.01	128.917	1.14	4.34	410.422	1.2519	1.35	29.63	0.259709	554.069	80.3325	29.749	77.2079	0	1.97925
2021-03-19 17:30:00	347.99	15.7341	5.81	129.873	1.14	4.34	410.669	1.25551	1.35	29.63	0.280254	554.403	84.0814	30.2103	83.5082	0	1.98731
2021-03-19 18:30:00	353.826	13.0604	5.83	134.06	1.14	4.34	410.136	1.25701	1.35	29.63	0.222037	553.684	78.8266	30.0029	74.0977	0	1.98409
2021-03-19 19:30:00	354.906	15.3125	5.83	134.38	1.14	4.34	410.351	1.2607	1.35	29.63	0.280041	553.974	84.5829	29.7766	80.4782	0	1.9597
2021-03-19 20:30:00	357.027	15.546	5.81	134.42	1.14	4.34	409.801	1.2683	1.35	29.63	0.288728	553.231	85.2719	29.7454	77.9811	0	1.96085
2021-03-19 21:30:00	354.408	15.7072	5.81	133.917	1.14	4.34	410.048	1.2689	1.35	29.63	0.289385	553.565	85.2652	29.5981	75.8885	0	1.97824
2021-03-19 22:30:00	345.631	15.934	4.44	138.021	1.14	4.34	408.15	1.27229	1.35	29.63	0.273741	551.003	81.1498	30.7048	79.6674	0	1.9757
2021-03-19 23:30:00	353.451	15.8154	4.44	121.53	1.14	3.8	420.378	1.27486	1.35	28.05	0.294181	567.511	83.7746	30.1829	91.1522	0	1.97575
2021-03-20 00:30:00	330.986	15.8304	6.1	123.435	1.14	3.8	420.068	1.2749	1.35	28.05	0.286727	567.092	87.0468	29.4778	80.7446	0	2.08239
2021-03-20 01:30:00	362.76	15.054	4.76	123.532	1.14	3.8	417.195	1.2811	1.35	28.05	0.292218	563.213	84.5363	28.4711	80.2065	0	1.97919
2021-03-20 02:30:00	357.496	15.8475	5.53	116.944	1.14	3.8	417.029	1.2841	1.35	28.05	0.312271	562.989	87.0431	30.8241	77.2753	0	2.02332
2021-03-20 03:30:00	352.727	16.0828	6.34	114.683	1.14	4.14	415.798	1.2865	1.35	27.7	0.315906	561.328	86.5873	30.119	79.9709	0	2.04158
2021-03-20 04:30:00	352.613	15.924	5.42	117.469	1.14	4.14	421.618	1.28733	1.35	27.7	0.297123	569.184	83.4291	29.2921	78.9031	0	2.03757
2021-03-20 05:30:00	349.707	15.3904	5.42	118.471	1.14	4.14	423.072	1.2862	1.35	27.7	0.278651	571.147	81.9095	28.8494	77.7863	0	2.04902
2021-03-20 06:30:00	351.932	16.1173	5.9617	123.141	1.14	4.14	421.544	1.28738	1.35	27.7	0.309755	569.085	86.0844	28.3117	80.6273	0	2.01545
2021-03-20 07:30:00	350.949	16.2792	5.91064	118.695	1.14	4.14	421.641	1.29251	1.35	27.7	0.309932	569.215	85.5353	31.5176	73.2274	0	2.05038
2021-03-20 08:30:00	219.832	13.3613	5.35	141.968	1.14	4.14	357.384	1.2909	1.35	27.7	0.158854	482.468	72.2782	28.422	77.6496	0	2.48446
2021-03-20 09:30:00	393.064	15.6793	6.31049	133.482	1.14	4.14	412.877	1.2909	1.35	27.7	0.366714	557.384	91.8693	31.9076	82.772	0	1.83629
2021-03-20 10:30:00	327.797	16.1458	6.27246	129.365	1.14	4.14	413.024	1.2909	1.35	27.7	0.297579	557.583	86.8414	31.687	82.0767	0	2.05724
2021-03-20 11:30:00	375.35	15.7445	6.23444	123.271	1.14	4.14	407.719	1.2909	1.35	27.7	0.347555	550.421	89.6673	31.3034	83.9308	0	1.92008
2021-03-20 12:30:00	383.359	14.6038	5.89	125.947	1.14	4.14	418.321	1.2909	1.35	26.8606	0.320018	564.733	86.7087	30.926	79.8293	0	1.90027
2021-03-20 13:30:00	350.428	16.5816	6.5755	126.323	1.14	4.14	421.82	1.2962	1.35	26.8494	0.340242	569.457	89.5281	27.0786	87.5278	0	1.98966
2021-03-20 14:30:00	343.34	16.9698	7.25	128.93	1.14	4.14	419.43	1.2962	1.35	26.8381	0.353851	566.23	92.2922	30.1	83.9875	0	2.00492
2021-03-20 15:30:00	340.844	16.2582	7.25	129.864	1.14	4.14	415.403	1.297	1.35	26.8269	0.337441	560.794	91.6101	30.2833	85.7156	0	2.00333
2021-03-20 16:30:00	372.254	15.5325	6.36	129.088	1.14	3.64542	413.332	1.2983	1.35	26.8156	0.362274	557.999	93.7517	29.8312	78.4682	0	1.93048
2021-03-20 17:30:00	385.23	15.4998	6.62	128.129	1.14	3.62042	412.594	1.3013	1.35	26.8044	0.381103	557.002	95.2924	33.0995	78.921	0	1.88366
2021-03-20 18:30:00	374.488	15.9628	6.01	126.741	1.14	3.59542	404.099	1.3034	1.35	26.7931	0.385994	545.534	94.3797	27.3933	74.5979	0	1.95147
2021-03-20 19:30:00	359.809	15.294	6.35256	139.599	1.14	3.57042	417.047	1.3059	1.35	26.7819	0.344625	563.014	94.4308	27.3753	78.9723	0	1.93794
2021-03-20 20:30:00	354.496	15.6137	6.29674	120.816	1.14	3.54542	417.187	1.30711	1.35	26.78	0.33666	563.202	91.7381	30.2006	78.0997	0	2.01788
2021-03-20 21:30:00	339.629	15.2729	6.24093	122.61	1.14	3.52042	409.018	1.30717	1.35	26.78	0.320443	552.174	91.3507	30.3132	78.2768	0	2.06089
2021-03-20 22:30:00	327.461	16.1072	4.54	132.755	1.14	3.49542	415.751	1.3119	1.35	26.78	0.30605	561.264	87.215	30.957	79.4712	0	2.05657
2021-03-20 23:30:00	353.344	16.8185	4.82	122.781	1.14	3.47042	411.058	1.3118	1.35	29.54	0.324298	554.928	89.4555	30.9705	79.6214	0	2.00659
2021-03-21 00:30:00	357.574	16.7054	5.5	126.239	1.14	3.46	419.669	1.3164	1.35	29.54	0.325173	566.553	91.1051	29.0857	85.9426	0	1.96555
2021-03-21 01:30:00	358.07	16.2097	5.72937	129.608	1.14	3.46	415.61	1.3182	1.35	29.54	0.32184	561.074	91.9026	28.2457	85.9587	0	1.95441
2021-03-21 02:30:00	313.242	16.0175	4.65	125.306	1.14	4.03	416.173	1.3203	1.35	26.8	0.267132	561.834	80.1667	30.6166	84.8699	0	2.12008
2021-03-21 03:30:00	385.098	16.3809	6.62	130.364	1.14	4.03	407.045	1.324	1.35	26.8	0.405803	549.511	94.7365	30.6385	82.2463	0	1.8741
2021-03-21 04:30:00	349.887	17.0074	6.62	140.984	1.14	4.03	410.484	1.32297	1.35	26.8	0.378933	554.153	94.5718	27.7493	75.0566	0	1.97548
2021-03-21 05:30:00	318.898	15.0662	4.99	117.002	1.14	4.03	420.946	1.3239	1.35	26.8	0.245757	568.277	77.9012	29.9895	86.2078	0	2.13164
2021-03-21 06:30:00	369.453	16.4256	5.24	117.895	1.14	4.03	421.538	1.3239	1.35	26.8	0.345687	569.077	86.8776	29.7955	70.9193	0	2.00439
2021-03-21 07:30:00	358.719	16.1453	4.78337	121.068	1.14	4.03	421.124	1.3239	1.35	26.8	0.321409	568.517	84.5544	29.228	74.89	0	2.01678
2021-03-21 08:30:00	353.867	16.7782	5.17	116.865	1.14	4.03	421.455	1.3261	1.35	26.8	0.334466	568.964	85.8985	28.1865	72.9501	0	2.06006
2021-03-21 09:30:00	348.316	16.5602	4.38519	114.253	1.14	4.03	416.816	1.3256	1.35	26.8	0.317784	562.701	83.0816	30.803	78.9303	0	2.05982
2021-03-21 10:30:00	345.867	16.1779	4.44815	113.875	1.14	4.03	415.634	1.3259	1.35	26.8	0.306158	561.106	82.28	27.7128	71.0123	0	2.10963
2021-03-21 11:30:00	356.121	16.4047	4.51111	116.61	1.14	4.03	412.468	1.3255	1.35	26.8	0.331075	556.832	84.5705	30.769	76.7368	0	2.03129
2021-03-21 12:30:00	354.938	16.2874	4.77	148.32	1.14	3.55	415.702	1.3255	1.35	27.86	0.336831	561.197	91.0973	30.3994	82.6577	0	1.9021
2021-03-21 13:30:00	379.172	17.8234	5.22	115.228	1.14	3.55	396.969	1.3255	1.35	27.86	0.425345	535.908	93.9692	30.2338	85.2122	0	1.93584
2021-03-21 14:30:00	347.66	17.0696	6.46	126.176	1.14	3.55	406.189	1.3255	1.35	27.86	0.36885	548.355	94.9545	29.8424	72.4168	0	2.04087
2021-03-21 15:30:00	341.461	17.1347	5.08	133.186	1.14	3.55	410.796	1.3307	1.35	27.86	0.345164	554.574	91.1484	29.6445	83.1584	0	1.99934
2021-03-21 16:30:00	332.73	14.636	6.14	143.2	1.14	4.10927	414.745	1.3299	1.35	27.58	0.271765	559.906	86.1765	28.0404	79.7017	0	2.0072
2021-03-21 17:30:00	200.625	18.1657	4.59	178.848	1.14	4.10802	310.685	1.3299	1.35	27.58	0.290238	419.425	92.1227	29.9717	74.66	0	2.38006
2021-03-21 18:30:00	324.32	17.9114	5.58	129.535	1.14	4.10677	410.92	1.3299	1.35	27.58	0.334432	554.742	88.0823	28.9833	78.062	0	2.09277
2021-03-21 19:30:00	306.27	17.6592	5.09	127.104	1.14	4.10552	346.573	1.3304	1.35	27.58	0.384696	467.873	91.7837	27.3647	75.6514	0	2.18662
2021-03-21 20:30:00	359	15.9019	4.96	125.217	1.14	4.10427	413.982	1.33079	1.35	27.58	0.314255	558.875	84.8493	29.9704	74.5695	0	1.99871
2021-03-21 21:30:00	356.184	16.5618	4.96	118.797	1.14	4.10302	414.123	1.331	1.35	27.58	0.325856	559.066	85.1728	29.4298	89.899	0	1.98348
2021-03-21 22:30:00	359.578	16.673	5.94148	118.654	1.14	4.10177	405.008	1.3315	1.35	27.58	0.354931	546.761	89.2746	31.2006	80.848	0	1.99671
2021-03-21 23:30:00	339.863	14.6353	4.96	131.77	1.14	4.10052	417.834	1.3314	1.35	17.47	0.45165	564.076	89.4802	29.7668	82.7687	0	2.01088
2021-03-22 00:30:00	351.918	16.5124	6.26662	120.489	1.14	4.1	420.551	1.33193	1.35	17.47	0.572279	567.744	97.6792	29.226	80.8134	0	2.02196
2021-03-22 01:30:00	368.543	18.1244	6.31074	125.305	1.14	4.1	411.405	1.3332	1.35	17.47	0.714277	555.396	103.755	27.4112	81.4544	0	1.95369
2021-03-22 02:30:00	353.629	15.899	6.35485	123.165	1.14	4.1	409.203	1.33341	1.35	17.47	0.575379	552.424	98.7644	30.7852	80.3245	0	2.00247
2021-03-22 03:30:00	345.969	16.4611	6.63	120.919	1.14	3.35	410.03	1.33454	1.35	25.27	0.391855	553.54	96.2461	30.1407	76.9869	0	2.0506
2021-03-22 04:30:00	336.133	15.8921	5.47	120.194	1.14	3.35	410.857	1.33471	1.35	25.27	0.348185	554.657	91.3582	29.8804	80.0698	0	2.07817
2021-03-22 05:30:00	377.879	15.3297	5.12116	123.84	1.14	3.35	411.684	1.3371	1.35	25.27	0.382016	555.773	92.6185	29.954	80.265	0	1.92569
2021-03-22 06:30:00	316.797	14.9485	5.19554	127.024	1.14	3.35	425.661	1.3357	1.35	25.27	0.282859	574.642	86.735	30.0557	78.6539	0	2.12478
2021-03-22 07:30:00	365.184	15.0832	4.5	126.397	1.14	3.35	422.969	1.3357	1.35	25.27	0.339046	571.009	88.8182	29.581	79.196	0	1.96066
2021-03-22 08:30:00	384.684	14.0482	5.66	123.027	1.14	3.35	414.277	1.34	1.35	25.27	0.352742	559.274	92.2492	31.401	77.7633	0	1.91104
2021-03-22 09:30:00	381.828	14.7549	6.08491	123.637	1.14	3.35	426.176	1.3401	1.35	25.27	0.361902	575.338	93.3932	31.5927	75.4015	0	1.92418
2021-03-22 10:30:00	365.785	16.3727	6.01945	127.531	1.14	3.35	412.943	1.3398	1.35	25.27	0.408884	557.474	96.1798	31.7666	80.8182	0	1.94273
2021-03-22 11:30:00	352.637	15.3266	5.954	129.099	1.14	3.35	411.377	1.34	1.35	25.27	0.363128	555.359	94.2901	31.4185	80.2183	0	1.98184
2021-03-22 12:30:00	338.168	16.7632	4.8	134.653	1.14	3.92	409.811	1.2535	1.35	27.51	0.324639	553.245	87.1604	0.668857	97.3005	0	2.05513
2021-03-22 13:30:00	328.051	16.6868	4.29	131.809	1.14	3.92	410.746	1.253	1.35	27.51	0.301591	554.507	84.0433	1.24432	103.368	0	2.07881
2021-03-22 14:30:00	355.188	15.2453	4.81708	139.138	1.14	3.92	409.554	1.25285	1.35	27.51	0.307575	552.898	86.3958	0.852041	107.5	0	1.94772
2021-03-22 15:30:00	356.785	16.1508	4.84208	135.883	1.14	3.92	410.224	1.2521	1.35	27.51	0.332323	553.802	87.8628	0.983772	105.794	0	1.95934
2021-03-22 16:30:00	312.008	17.7044	5.65	134.793	1.14	4.17	410.893	1.252	1.35	28.73	0.299407	554.706	86.38	0.444344	97.2807	0	2.15086
2021-03-22 17:30:00	368.504	17.1852	5.45316	131.884	1.14	4.17	409.584	1.252	1.35	28.73	0.356913	552.938	89.5318	0.932762	101.43	0	1.95068
2021-03-22 18:30:00	395.027	18.1593	5.48474	137.163	1.14	4.17	409.849	1.25306	1.35	28.73	0.421209	553.297	93.3394	1.21707	99.5861	0	1.85801
2021-03-22 19:30:00	400.859	15.2565	4.96	134.153	1.14	4.17	410.115	1.2536	1.35	28.73	0.335755	553.655	87.3274	0.962484	94.601	0	1.86614
2021-03-22 20:30:00	346.184	17.337	4.84605	128.489	1.14	4.17	409.728	1.25351	1.35	28.73	0.32426	553.132	85.8575	0.533995	106.786	0	2.01971
2021-03-22 21:30:00	344.785	16.2577	4.76233	123.053	1.14	4.17	410.667	1.2537	1.35	28.73	0.290952	554.401	82.6747	0.912107	98.6965	0	2.07259
2021-03-22 22:30:00	349.23	15.7208	5.61	126.762	1.14	3.995	409.811	1.2531	1.35	31.57	0.26814	553.245	85.3034	1.28503	99.9622	0	2.03667
2021-03-22 23:30:00	344.059	16.9968	5.61	124.217	1.14	3.82	422.37	1.25153	1.35	31.57	0.28213	570.2	86.8461	1.23582	110.216	0	2.0294
2021-03-23 00:30:00	343.379	17.12	5.32	121.616	1.14	3.82	419.137	1.2519	1.35	31.57	0.283706	565.835	86.2097	1.06339	111.822	0	2.03694
2021-03-23 01:30:00	362.305	16.0688	5.32	164.663	1.14	3.82	414.016	1.2519	1.35	31.57	0.302084	558.922	91.5582	0.798395	102.386	0	1.85515
2021-03-23 02:30:00	355.145	15.7864	5.32	121.259	1.14	3.82	422.523	1.2537	1.35	31.57	0.262996	570.406	84.4735	1.50757	110.424	0	2.00193
2021-03-23 03:30:00	363.281	16.7453	5.32	127.975	1.14	3.82	422.327	1.25428	1.35	31.57	0.295893	570.142	87.5501	1.29331	111.774	0	1.94746
2021-03-23 04:30:00	344.426	15.2312	5.32	145.572	1.14	3.82	416.496	1.25415	1.35	31.57	0.255145	562.269	86.3328	0.833029	107.841	0	1.95749
2021-03-23 05:30:00	357.051	15.4544	5.32	148.902	1.14	3.82	419.792	1.25557	1.35	31.57	0.270639	566.719	87.7509	1.23277	109.837	0	1.89975
2021-03-23 06:30:00	351.742	15.5583	5.32	147.024	1.14	3.82	423.088	1.2554	1.35	31.57	0.26387	571.169	86.9445	1.10112	98.6736	0	1.95727
2021-03-23 07:30:00	354.863	16.3509	5.32	148.969	1.14	3.82	425.127	1.2557	1.35	31.57	0.283394	573.922	88.4942	1.32478	111.564	0	1.90062
2021-03-23 08:30:00	352.23	15.242	5.32	138.571	1.14	3.82	436.544	1.25596	1.35	31.57	0.24201	589.335	83.8689	1.30056	121.781	0	1.9135
2021-03-23 09:30:00	376.75	15.5927	5.32	145.846	1.14	3.82	429.277	1.2562	1.35	31.57	0.282637	579.523	88.0237	1.32072	0.246055	0	2.22518
2021-03-23 10:30:00	371.598	16.3836	5.32	139.814	1.14	3.82	410.959	1.25711	1.35	31.57	0.312865	554.795	90.0082	1.95899	99.4408	0	1.91622
2021-03-23 11:30:00	356.551	16.2944	5.32	117.173	1.14	3.82	419.185	1.25799	1.35	31.57	0.277557	565.899	85.3506	1.1744	86.7663	0	2.09627
2021-03-23 12:30:00	382.023	16.9484	5.32	124.706	1.14	3.82	413.754	1.25752	1.35	31.57	0.32885	558.568	89.5635	1.40174	102.326	0	1.92986
2021-03-23 13:30:00	354.852	17.149	4.86	136.606	1.14	3.78	410.728	1.25682	1.35	29.7797	0.329226	554.482	89.3342	1.11206	105.954	0	1.96194
2021-03-23 14:30:00	356.359	18.1236	4.86	130.407	1.14	3.6	413.587	1.25682	1.35	29.7759	0.353812	558.343	91.0761	1.08848	98.7446	0	2.00343
2021-03-23 15:30:00	357.312	17.1199	6.43	135.61	1.14	3.6	416.447	1.25821	1.35	29.7722	0.345741	562.203	94.6033	1.21225	101.379	0	1.972
2021-03-23 16:30:00	373.246	15.174	4.61	132.473	1.14	4.11438	424.673	1.2581	1.35	29.7684	0.272036	573.309	81.974	1.13884	92.5433	0	1.96099
2021-03-23 17:30:00	367.992	16.8618	5.38	138.135	1.14	4.12188	419.57	1.2577	1.35	29.7647	0.324795	566.42	88.2482	1.00196	102.745	0	1.92588
2021-03-23 18:30:00	365.621	Calc Failed	5.38	Error	1.14	4.12937	424.215	Error	1.35	29.7609	#VALUE!	572.69	#VALUE!	1.25541	107.418	0	#VALUE!
2021-03-23 19:30:00	363.25	Calc Failed	5.38	Error	1.14	4.13688	212.238	Error	1.35	29.7572	#VALUE!	286.522	#VALUE!	1.32052	107.309	Error	#VALUE!
2021-03-23 20:30:00	360.879	16.2882	4.02	-4.29805	1.14	4.14438	0.261856	1.2585	1.35	29.7534	646.961	0.353506	115.765	0.931758	110.007	Error	2.59529
2021-03-23 21:30:00	358.508	16.2882	4.02	128.388	1.14	4.15188	431.729	1.2595	1.35	29.75	0.26864	582.835	79.7685	0.987832	79.3228	0	2.0708
2021-03-23 22:30:00	395.512	16.4761	4.02	132.346	1.14	4.15938	411.148	1.2595	1.35	29.75	0.33894	555.05	85.8873	1.26112	102.621	0	1.86352
2021-03-23 23:30:00	354.008	16.57	5.50529	126.034	1.14	4.16687	424.909	1.262	1.35	29.75	0.290741	573.627	84.5838	1.12782	93.2104	0	2.04686
2021-03-24 00:30:00	336.309	21	5.47588	125.655	1.14	4.17	418.31	1.2627	1.35	29.26	0.387613	564.719	90.6875	1.54043	95.0626	0	2.10322
2021-03-24 01:30:00	362.602	18.3141	5.19	133.293	1.14	4.17	404.468	1.2635	1.35	29.26	0.376088	546.032	90.4833	1.45143	104.816	0	1.95191
2021-03-24 02:30:00	357.547	15.9092	4.6	128.446	1.14	4.17	409.556	1.26326	1.35	29.26	0.292401	552.901	83.1607	1.10684	106.234	0	1.98226
2021-03-24 03:30:00	359.773	15.6845	5.73	129.501	1.14	4.17	408.914	1.2637	1.35	29.26	0.302285	552.034	86.528	0.507538	96.7039	0	2.00423
2021-03-24 04:30:00	357.629	15.1292	5.48287	138.749	1.14	3.94	410.017	1.2637	1.35	27.9	0.30892	553.522	88.173	1.62071	100.615	0	1.96071
2021-03-24 05:30:00	358.082	14.2647	5.52713	133.682	1.14	3.92	409.431	1.26436	1.35	27.9	0.285453	552.732	86.1804	1.20921	101.846	0	1.9751
2021-03-24 06:30:00	356.23	14.5245	4.55	141.016	1.14	3.9	409.485	1.2647	1.35	27.9	0.282617	552.805	84.2448	1.40095	97.475	0	1.96762
2021-03-24 07:30:00	327.23	15.734	6.08	139.035	1.14	3.88	407.636	1.2644	1.35	27.9	0.300878	550.309	89.7238	1.54934	105.824	0	2.04313
2021-03-24 08:30:00	344.977	16.844	5.68	128.108	1.14	3.86	409.578	1.2644	1.35	27.9	0.33899	552.93	89.9966	1.62477	100.603	0	2.04264
2021-03-24 09:30:00	375.461	15.0842	5.21	138.893	1.14	3.84	402.875	1.2644	1.35	27.9	0.33624	543.882	90.0888	1.46133	102.455	0	1.9002
2021-03-24 10:30:00	355.566	15.4949	5.252	133.988	1.14	3.82	410.554	1.26846	1.35	27.9	0.314279	554.248	88.2093	1.24683	98.5001	0	1.99288
2021-03-24 11:30:00	345.98	16.8796	5.42	134.342	1.14	3.8	398.039	1.2686	1.35	27.9	0.357381	537.352	91.7446	5.62599	103.269	0	1.99299
2021-03-24 12:30:00	350.051	15.7872	5.11	133.422	1.14	3.78	409.52	1.26867	1.35	22.15	0.41491	552.851	91.9391	39.825	81.7317	0	1.94288
2021-03-24 13:30:00	371.641	16.2399	6.27	134.709	1.14	3.7575	407.69	1.2684	1.35	22.15	0.487037	550.381	98.3768	26.4292	82.9988	0	1.90942
2021-03-24 14:30:00	363.586	16.1962	6.32318	133.787	1.14	3.735	410.989	1.2684	1.35	22.15	0.467911	554.835	97.6521	26.8749	77.7038	0	1.95235
2021-03-24 15:30:00	357.574	16.9786	6.24136	129.309	1.14	3.7125	414.288	1.26878	1.35	22.15	0.476614	559.289	97.2545	26.764	77.1206	0	1.99022
2021-03-24 16:30:00	352.016	17.192	6.15955	128.646	1.14	3.69	411.361	1.26886	1.35	24.52	0.424113	555.337	95.4267	25.5855	84.1181	0	1.99185
2021-03-24 17:30:00	340.719	17.4472	6.39192	120.127	1.14	3.6675	414.901	1.26841	1.35	24.52	0.408027	560.117	94.2687	25.8288	79.9944	0	2.07681
2021-03-24 18:30:00	362.984	16.951	5.31	131.14	1.14	3.645	415.493	1.2689	1.35	24.52	0.418672	560.915	93.5851	25.6572	83.0287	0	1.95082
2021-03-24 19:30:00	370.086	17.7979	4.32	127.146	1.14	3.6225	410.927	1.27096	1.35	24.52	0.448836	554.751	92.6908	26.0826	74.8274	0	1.96737
2021-03-24 20:30:00	372.945	15.9183	6.34	127.999	1.14	3.6	409.896	1.2709	1.35	24.52	0.420661	553.359	96.1431	25.9472	77.4296	0	1.94746
2021-03-24 21:30:00	347.336	15.8845	6.34	124.943	1.14	3.6	415.637	1.2713	1.35	24.52	0.374863	561.11	93.4798	27.1066	72.3561	0	2.05655
2021-03-24 22:30:00	359.211	16.8773	4.57	128.723	1.14	3.6	420.601	1.27176	1.35	24.52	0.394745	567.811	90.6542	23.7809	83.0987	0	1.97735
2021-03-24 23:30:00	369.188	15.7172	5.02	129.216	1.14	3.345	413.157	1.2717	1.35	28.48	0.333565	557.762	91.3159	25.8851	83.8646	0	1.93502
2021-03-25 00:30:00	372.422	15.2857	5.23	120.7	1.14	3.36	404.196	1.27194	1.35	28.48	0.334056	545.665	91.1936	25.9663	87.2421	0	1.94438
2021-03-25 01:30:00	272.188	17.0151	4.13	148.308	1.14	3.375	397.7	1.2716	1.35	28.48	0.260969	536.895	86.1621	23.4927	75.8353	0	2.24162
2021-03-25 02:30:00	402.672	16.7069	5.28	126.253	1.14	3.39	402.007	1.2716	1.35	31.71	0.367451	542.71	93.9975	27.4076	85.3864	0	1.83773
2021-03-25 03:30:00	361.258	16.4533	4.35176	133.682	1.14	3.405	420.972	1.2716	1.35	31.71	0.290437	568.312	88.057	23.7668	84.7259	0	1.94775
2021-03-25 04:30:00	366.445	16.4003	4.29416	131.255	1.14	3.42	411.631	1.27357	1.35	31.71	0.302264	555.702	88.6268	23.8569	86.4195	0	1.93468
2021-03-25 05:30:00	343.789	16.4002	4.52	130.618	1.14	3.435	416.149	1.27382	1.35	31.71	0.275825	561.801	87.1509	26.9097	80.7699	0	2.0184
2021-03-25 06:30:00	348.062	16.4001	5.86	135.729	1.14	3.45	417.411	1.2739	1.35	31.71	0.293312	563.505	91.8163	26.5709	87.0425	0	1.96589
2021-03-25 07:30:00	326.109	16.4	5.86	133.697	1.14	3.46	418.673	1.272	1.35	31.71	0.268409	565.209	89.9486	26.9299	89.3162	0	2.03741
2021-03-25 08:30:00	339.234	17.29	6.67	120.387	1.14	3.46	422.668	1.272	1.35	31.71	0.298178	570.602	91.9835	25.9961	81.8156	0	2.07396
2021-03-25 09:30:00	362.156	16.3969	6.65	127.71	1.14	3.46	414.963	1.272	1.35	31.71	0.313929	560.201	93.91	25.9813	82.8028	0	1.9655
2021-03-25 10:30:00	358.781	16.2506	6.65	127.276	1.14	3.46	414.34	1.272	1.35	31.71	0.307552	559.36	93.5636	25.4262	76.7268	0	1.99956
2021-03-25 11:30:00	328.789	16.1476	5.04	129.253	1.14	3.46	417.373	1.2751	1.35	31.71	0.257719	563.454	86.731	26.8872	69.4939	0	2.11659
[truncated: 325 more rows]
